# Supplementary material
Source: publisher figshare collection journal article supplement (https://acs.figshare.com/ndownloader/files/22221984)

**Supporting Information for**

**A Hg(OTf)<sub>2</sub>-Catalyzed Enolate Umpolung Reaction Enables the  
Synthesis of Coumaran-3-ones and Indolin-3-ones**

Zhouting Rong,\* Weican Hu, Ning Dai and Guoying Qian\*

*College of Biological and Environmental Sciences, Zhejiang Wanli University,  
Ningbo 315100, People's Republic of China*

## Table of Contents

|                                                                           |    |
|---------------------------------------------------------------------------|----|
| 1. General Methods.....                                                   | 2  |
| 2. Procedure for the preparation of substrates.....                       | 2  |
| 3. Procedure for the synthesis of coumaran-3-ones and indolin-3-ones..... | 10 |
| 4. Procedure for the preparation of compounds 7a-d and 8a'-d'.....        | 17 |
| 5. References.....                                                        | 19 |
| 6. <sup>1</sup> H NMR and <sup>13</sup> C NMR Spectra.....                | 20 |

## 1. General Methods.

All reactions were carried out in solvents dried using a Solvent Purification System (SPS). Thin layer chromatography was carried out using TLC aluminum sheets coated with 0.2 mm of silica gel (Merck Gf234). Chromatographic purifications were carried out using flash grade silica gel (SDS Chromatogel 60 ACC, 40-60  $\mu\text{m}$ ). NMR spectra were recorded at 23  $^{\circ}\text{C}$  on Bruker Avance 400 Ultrashield apparatus (400 MHz,  $\text{CDCl}_3$  as solvent). Mass spectra were recorded on a Waters LCT Premier Spectrometer (ESI). Infrared spectra of **2d** and **6i** were recorded on a Nicolet AVATER FTIR330 spectrometer as thin film and are reported in reciprocal centimeter ( $\text{cm}^{-1}$ ). IR data of other products have been reported in previous publications.<sup>1</sup>

Note 1: The NMR spectra of compounds **2a**, **8a'-c'** were calibrated to 7.26 ppm ( $\text{CHCl}_3$  in  $\text{CDCl}_3$ ). All other compounds were calibrated to 0 ppm (TMS in  $\text{CDCl}_3$ ).

Note 2: Warning!  $\text{Hg}(\text{OTf})_2$  and the organomercury intermediates generated during the reactions might be toxic. Please take special care when operating reactions and disposing mercury containing waste.

## 2. Procedures for the preparation of substrates.

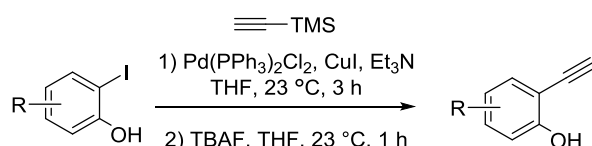

**General procedure A:**  $\text{Pd}(\text{PPh}_3)_2\text{Cl}_2$  (0.06 mmol),  $\text{CuI}$  (0.12 mmol) and  $\text{Et}_3\text{N}$  (9 mmol) were added sequentially to a solution of 2-iodophenol (3 mmol) and trimethylsilylacetylene (4.5 mmol) in THF (10 mL) at 23  $^{\circ}\text{C}$  and the mixture was stirred at this temperature for 3 h before it was quenched with saturated aqueous  $\text{NH}_4\text{Cl}$  (10 mL). The aqueous layer was extracted with  $\text{Et}_2\text{O}$  (10 mL) and the combined organic layer was washed sequentially with 0.1 N  $\text{HCl}$  (10 mL), water (10 mL) and brine (10 mL), dried over anhydrous  $\text{Na}_2\text{SO}_4$ . The solvent was evaporated and the residue was dissolved in THF (15 mL) and tetrabutylammonium fluoride (4.5 mL, 1.0 M in THF, 4.5 mmol) was added dropwise. The reaction mixture was then stirred at 23  $^{\circ}\text{C}$  for 1 h before it was quenched with saturated aqueous  $\text{NH}_4\text{Cl}$  (15 mL). The aqueous layer was extracted with  $\text{Et}_2\text{O}$  and the combined organic layer was washed sequentially with water (10 mL) and brine (10 mL), dried over anhydrous  $\text{Na}_2\text{SO}_4$ . The solvent was evaporated and the residue was purified by flash column chromatography (hexane/ $\text{EtOAc}$ =10/1) to give 2-ethynylphenol. Substrates **1b**, **1g** and **1h** were synthesized using general procedure A.

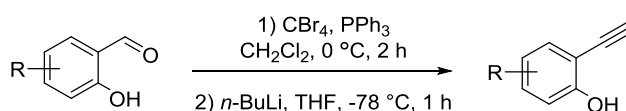

**General procedure B:** To a stirred solution of salicylaldehyde (10 mmol) and carbon tetrabromide (20 mmol) in dichloromethane (10 mL) was added triphenylphosphine (40 mmol) in portions over a period of 20 minutes at 0 °C temperature. The reaction mixture was allowed to stir at 0 °C temperature for 2 h before it was quenched with water (15 mL). The reaction mixture was extracted with dichloromethane (2 x 20 mL) and the organic layers were washed with brine (10 mL). The organic layers were dried over anhydrous Na<sub>2</sub>SO<sub>4</sub> and the solvent was evaporated under reduced pressure and the residue was purified by flash column chromatography (hexane/EtOAc=10/1) to give product. The product was then dissolved in THF (40 mL) and *n*-BuLi (15 mL, 2.0 M in hexanes, 30 mmol) was added dropwise at -78 °C and the mixture was stirred at -78 °C for 1 h before it was quenched with saturated aqueous NH<sub>4</sub>Cl (50 mL). The aqueous layer was extracted with Et<sub>2</sub>O (50 mL) and the combined organic layer was washed sequentially with water (50 mL) and brine (50 mL), dried over anhydrous Na<sub>2</sub>SO<sub>4</sub>. The solvent was evaporated and the residue was purified by flash column chromatography (hexane/EtOAc=10/1) to give 2-ethynylphenol. Substrates **1c**, **1d**, **1e**, **1f**, **1i**, **1j**, **1k** and **1l** were synthesized using general procedure B.

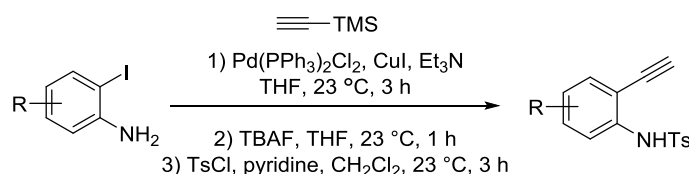

**General procedure C:** Pd(PPh<sub>3</sub>)<sub>2</sub>Cl<sub>2</sub> (0.06 mmol), CuI (0.12 mmol) and Et<sub>3</sub>N (9 mmol) were added sequentially to a solution of 2-iodoaniline (3 mmol) and trimethylsilylacetylene (4.5 mmol) in THF (10 mL) at 23 °C and the mixture was stirred at this temperature for 3 h before it was quenched with saturated aqueous NH<sub>4</sub>Cl (10 mL). The aqueous layer was extracted with Et<sub>2</sub>O (10 mL) and the combined organic layer was washed sequentially with 0.1 N HCl (10 mL), water (10 mL) and brine (10 mL), dried over anhydrous Na<sub>2</sub>SO<sub>4</sub>. The solvent was evaporated and the residue was dissolved in THF (15 mL) and tetrabutylammonium fluoride (4.5 mL, 1.0 M in THF, 4.5 mmol) was added dropwise. The reaction mixture was then stirred at 23 °C for 1 h before it was quenched with saturated aqueous NH<sub>4</sub>Cl (15 mL). The aqueous layer was extracted with Et<sub>2</sub>O and the combined organic layer was washed sequentially with water (10 mL) and brine (10 mL), dried over anhydrous Na<sub>2</sub>SO<sub>4</sub>. The solvent was evaporated and the residue was purified by flash column chromatography (hexane/EtOAc=5/1) to give 2-ethynylaniline which was dissolved in dichloromethane (3 mL). Tosyl chloride (3.6 mmol) and pyridine (12 mmol) was added and the mixture was stirred at 23 °C for 3 h before it was quenched with saturated aqueous NH<sub>4</sub>Cl (5 mL). The aqueous layer was extracted with dichloromethane (5 mL) and the combined organic layer was washed sequentially with 0.1 N HCl (5 mL), water (5 mL) and brine (5 mL), dried over anhydrous Na<sub>2</sub>SO<sub>4</sub>. The solvent was evaporated and the residue was purified by flash column

chromatography (hexane/EtOAc=3/1) to give *N*-tosyl-2-ethynylaniline. Substrates **5a-i** were synthesized using general procedure C.

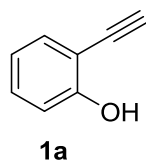

Substrate **1a** was purchased from commercial sources and used without purification.

**<sup>1</sup>H NMR** (400 MHz, CDCl<sub>3</sub>) δ 7.37 (dd, *J* = 7.5, 1.5 Hz, 1H), 7.27 (td, *J* = 7.5, 1.5 Hz, 1H), 6.93 (d, *J* = 8.0 Hz, 1H), 6.86 (t, *J* = 8.0 Hz, 1H), 5.89 (s, 1H), 3.45 (s, 1H). The data is in accordance with the literature.<sup>2</sup>

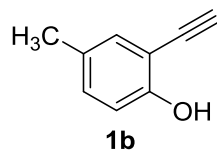

333 mg, overall yield: 84%, colorless oil.

**<sup>1</sup>H NMR** (400 MHz, CDCl<sub>3</sub>) δ 7.21 (d, *J* = 2.2 Hz, 1H), 7.14 – 7.06 (m, 1H), 6.87 (d, *J* = 8.3 Hz, 1H), 5.73 (s, 1H), 3.46 (s, 1H), 2.28 (s, 3H).

**<sup>13</sup>C NMR** (101 MHz, CDCl<sub>3</sub>) δ 155.3, 132.1, 131.7, 129.6, 114.7, 107.9, 83.9, 78.6, 20.3.

**HRMS** (ESI) *m/z*: [*M* + *H*]<sup>+</sup> Calcd for C<sub>9</sub>H<sub>9</sub>O 133.0653; Found 133.0655.

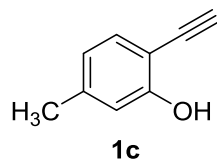

581 mg, overall yield: 44%, colorless oil.

**<sup>1</sup>H NMR** (400 MHz, CDCl<sub>3</sub>) δ 7.25 (d, *J* = 8.0 Hz, 1H), 6.76 (s, 1H), 6.67 (d, *J* = 7.5 Hz, 1H), 5.75 (s, 1H), 3.41 (s, 1H), 2.31 (s, 3H). The data is in accordance with the literature.<sup>2</sup>

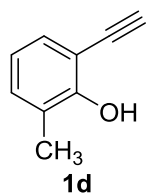

554 mg, overall yield: 42%, colorless oil.

**<sup>1</sup>H NMR** (400 MHz, CDCl<sub>3</sub>) δ 7.25 (dd, *J* = 7.7, 1.6 Hz, 1H), 7.15 (ddt, *J* = 7.5, 1.7, 0.9 Hz, 1H), 6.80 (t, *J* = 7.6 Hz, 1H), 5.89 (s, 1H), 3.48 (s, 1H), 2.28 (s, 3H).

**$^{13}\text{C}$  NMR** (101 MHz,  $\text{CDCl}_3$ )  $\delta$  155.6, 132.2, 129.4, 124.1, 119.9, 107.6, 84.0, 78.7, 15.9.

**HRMS** (ESI)  $m/z$ :  $[\text{M} + \text{H}]^+$  Calcd for  $\text{C}_9\text{H}_9\text{O}$  133.0653; Found 133.0651.

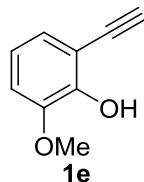

725 mg, overall yield: 49%, colorless oil.

**$^1\text{H}$  NMR** (400 MHz,  $\text{CDCl}_3$ )  $\delta$  7.05 (dd,  $J = 7.7, 1.6$  Hz, 1H), 6.89 (dd,  $J = 8.1, 1.5$  Hz, 1H), 6.85 – 6.80 (m, 1H), 6.01 (s, 1H), 3.92 (s, 3H), 3.38 (s, 1H).

**$^{13}\text{C}$  NMR** (101 MHz,  $\text{CDCl}_3$ )  $\delta$  147.6, 146.6, 125.0, 119.8, 111.7, 108.5, 82.0, 78.9, 56.1.

**HRMS** (ESI)  $m/z$ :  $[\text{M} + \text{H}]^+$  Calcd for  $\text{C}_9\text{H}_9\text{O}_2$  149.0603; Found 149.0606.

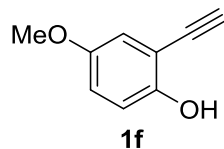

770 mg, overall yield: 52%, colorless oil.

**$^1\text{H}$  NMR** (400 MHz,  $\text{CDCl}_3$ )  $\delta$  6.92 – 6.90 (m, 1H), 6.89 (d,  $J = 1.2$  Hz, 2H), 5.54 (s, 1H), 3.77 (s, 3H), 3.47 (s, 1H).

**$^{13}\text{C}$  NMR** (101 MHz,  $\text{CDCl}_3$ )  $\delta$  152.9, 151.7, 118.0, 115.8, 115.7, 108.3, 84.0, 78.5, 55.8.

**HRMS** (ESI)  $m/z$ :  $[\text{M} + \text{H}]^+$  Calcd for  $\text{C}_9\text{H}_9\text{O}_2$  149.0603; Found 149.0608.

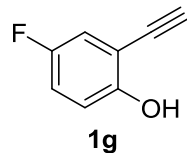

326 mg, overall yield: 80%, colorless oil.

**$^1\text{H}$  NMR** (400 MHz,  $\text{CDCl}_3$ )  $\delta$  7.08 (dd,  $J = 8.4$  Hz, 2.8 Hz, 1H), 7.04 – 6.96 (m, 1H), 6.90 (dd,  $J = 9.0$  Hz, 4.8 Hz, 1H), 5.66 (s, 1H), 3.50 (s, 1H). The data is in accordance with the literature.<sup>3</sup>

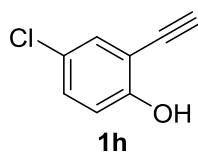

403 mg, overall yield: 88%, colorless oil.

**<sup>1</sup>H NMR** (400 MHz, CDCl<sub>3</sub>) δ 7.33 (d, J = 2.4 Hz, 1H), 7.21 (dd, J = 8.8, 2.4 Hz, 1H), 6.88 (d, J = 8.8 Hz, 1H), 5.79 (s, 1H), 3.48 (s, 1H). The data is in accordance with the literature.<sup>2</sup>

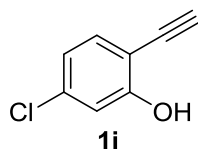

687 mg, overall yield: 45%, colorless oil.

**<sup>1</sup>H NMR** (400 MHz, CDCl<sub>3</sub>) δ 7.44 (d, J = 2.0 Hz, 1H), 7.29 (d, J = 8.3 Hz, 1H), 6.92 (dd, J = 8.3, 2.0 Hz, 1H), 5.76 (s, 1H), 3.45 (s, 1H). The data is in accordance with the literature.<sup>4</sup>

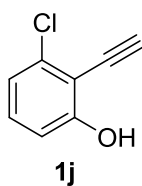

595 mg, overall yield: 39%, colorless oil.

**<sup>1</sup>H NMR** (400 MHz, CDCl<sub>3</sub>) δ 7.21 (t, J = 8.2 Hz, 1H), 7.00 (dd, J = 8.0, 1.0 Hz, 1H), 6.90 (dd, J = 8.3, 1.0 Hz, 1H), 5.96 (s, 1H), 3.78 (s, 1H).

**<sup>13</sup>C NMR** (101 MHz, CDCl<sub>3</sub>) δ 158.5, 135.8, 130.7, 121.1, 113.1, 109.2, 89.0, 75.4.

**HRMS** (ESI) m/z: [M + H]<sup>+</sup> Calcd for C<sub>6</sub>H<sub>6</sub>ClO 153.0107; Found 153.0104.

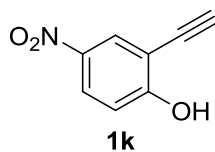

505 mg, overall yield: 31%, light yellow solid.

**<sup>1</sup>H NMR** (400 MHz, CDCl<sub>3</sub>) δ 8.34 (d, J = 2.8 Hz, 1H), 8.20 (dd, J = 9.1, 2.8 Hz, 1H), 7.08 (d, J = 9.1 Hz, 1H), 3.61 (s, 1H).

**<sup>13</sup>C NMR** (101 MHz, CDCl<sub>3</sub>) δ 162.3, 141.1, 128.3, 126.7, 115.5, 109.2, 86.4, 76.1.

**HRMS** (ESI) m/z: [M + H]<sup>+</sup> Calcd for C<sub>8</sub>H<sub>6</sub>NO<sub>3</sub> 164.0348; Found 164.0344.

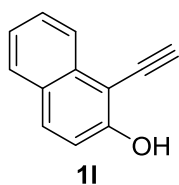

722 mg, overall yield: 43%, white solid

**<sup>1</sup>H NMR** (400 MHz, CDCl<sub>3</sub>) δ 8.75 (dq, J = 8.3, 0.9 Hz, 1H), 8.04 (d, J = 9.0 Hz, 1H), 7.89 (dt, J = 8.2, 0.9 Hz, 1H), 7.75 (ddd, J = 8.3, 7.0, 1.3 Hz, 1H), 7.54 (ddd, J = 8.3, 7.0, 1.3 Hz, 1H), 7.32 – 7.29 (m, 1H), 5.73 (s, 1H), 3.43 (s, 1H). The data is in accordance with the literature.<sup>5</sup>

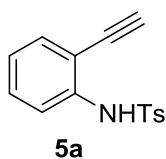

520 mg, overall yield: 64%, light yellow solid.

**<sup>1</sup>H NMR** (400 MHz, CDCl<sub>3</sub>) δ 7.73 – 7.69 (m, 2H), 7.61 (dd, J = 8.4, 1.1 Hz, 1H), 7.36 (dd, J = 7.7, 1.5 Hz, 1H), 7.34 – 7.28 (m, 1H), 7.26 (s, 1H), 7.24 (d, J = 8.1 Hz, 2H), 7.03 (td, J = 7.6, 1.1 Hz, 1H), 3.39 (s, 1H), 2.39 (s, 3H).

**<sup>13</sup>C NMR** (101 MHz, CDCl<sub>3</sub>) δ 144.1, 138.5, 135.9, 132.5, 130.2, 129.7, 127.4, 124.2, 119.3, 112.7, 84.4, 78.6, 21.6.

**HRMS** (ESI) m/z: [M + Na]<sup>+</sup> Calcd for C<sub>15</sub>H<sub>13</sub>NNaO<sub>2</sub>S 294.0565; Found 294.0569.

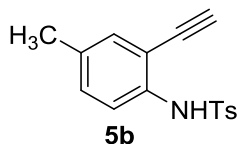

599 mg, overall yield: 70%, light yellow solid.

**<sup>1</sup>H NMR** (400 MHz, CDCl<sub>3</sub>) δ 7.72 – 7.65 (m, 2H), 7.51 (d, J = 8.3 Hz, 1H), 7.22 (d, J = 8.0 Hz, 2H), 7.18 – 7.08 (m, 3H), 3.32 (s, 1H), 2.38 (s, 3H), 2.24 (s, 3H).

**<sup>13</sup>C NMR** (101 MHz, CDCl<sub>3</sub>) δ 144.0, 136.0, 135.9, 134.2, 132.8, 131.0, 129.6, 127.4, 119.96, 113.0, 83.8, 78.8, 21.6, 20.5.

**HRMS** (ESI) m/z: [M + Na]<sup>+</sup> Calcd for C<sub>16</sub>H<sub>15</sub>NNaO<sub>2</sub>S 308.0723; Found 308.0728.

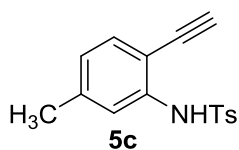

616 mg, overall yield: 72%, light yellow solid.



**<sup>1</sup>H NMR** (400 MHz, CDCl<sub>3</sub>) δ 7.74 – 7.68 (m, 2H), 7.46 – 7.42 (m, 1H), 7.26 – 7.18 (m, 4H), 6.83 (ddd, J = 7.9, 1.7, 0.8 Hz, 1H), 3.34 (s, 1H), 2.36 (s, 3H), 2.32 (s, 3H).

**<sup>13</sup>C NMR** (101 MHz, CDCl<sub>3</sub>) δ 144.1, 140.8, 138.3, 136.0, 132.2, 129.6, 127.3, 125.2, 120.1, 109.9, 83.8, 78.8, 21.8, 21.6.

**HRMS** (ESI) m/z: [M + Na]<sup>+</sup> Calcd for C<sub>16</sub>H<sub>15</sub>NNaO<sub>2</sub>S 308.0723; Found 308.0729.

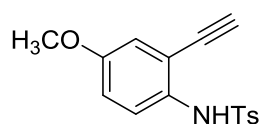

**5d**

686 mg, overall yield: 76%, brown solid.

**<sup>1</sup>H NMR** (400 MHz, CDCl<sub>3</sub>) δ 7.65 – 7.60 (m, 2H), 7.56 (d, J = 9.0 Hz, 1H), 7.24 – 7.19 (m, 2H), 6.90 (dd, J = 9.0, 3.0 Hz, 1H), 6.84 (d, J = 3.0 Hz, 1H), 3.76 (s, 3H), 3.25 (s, 1H), 2.39 (s, 3H).

**<sup>13</sup>C NMR** (101 MHz, CDCl<sub>3</sub>) δ 156.5, 143.9, 135.8, 131.5, 129.5, 127.4, 123.2, 116.7, 116.6, 115.2, 83.6, 78.7, 55.5, 21.6.

**HRMS** (ESI) m/z: [M + Na]<sup>+</sup> Calcd for C<sub>16</sub>H<sub>15</sub>NNaO<sub>3</sub>S 324.0672; Found 324.0678.

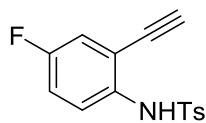

**5e**

512 mg, overall yield: 59%, yellow solid.

**<sup>1</sup>H NMR** (400 MHz, CDCl<sub>3</sub>) δ 7.67 – 7.64 (m, 2H), 7.61 (ddt, J = 9.1, 5.1, 1.2 Hz, 1H), 7.25 – 7.21 (m, 2H), 7.10 (s, 1H), 7.04 (td, J = 8.4, 2.3 Hz, 2H), 3.37 (s, 1H), 2.39 (s, 3H).

**<sup>13</sup>C NMR** (101 MHz, CDCl<sub>3</sub>) δ 159.0 (d, J = 246.4 Hz), 144.3, 135.6, 134.7 (d, J = 3.0 Hz), 129.7, 127.4, 122.5 (d, J = 9.1 Hz), 118.9 (d, J = 24.2 Hz), 117.5 (d, J = 22.2 Hz), 115.1 (d, J = 10.1 Hz), 85.0, 77.6 (d, J = 3.0 Hz), 21.6.

**HRMS** (ESI) m/z: [M + Na]<sup>+</sup> Calcd for C<sub>15</sub>H<sub>12</sub>FNNaO<sub>2</sub>S 312.0472; Found 312.0477.

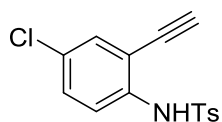

**5f**

569 mg, overall yield: 62%, brown solid.

**<sup>1</sup>H NMR** (400 MHz, CDCl<sub>3</sub>) δ 7.71 – 7.67 (m, 2H), 7.57 (d, J = 8.9 Hz, 1H), 7.33 (d, J = 2.4 Hz, 1H), 7.30 – 7.23 (m, 4H), 3.42 (s, 1H), 2.41 (s, 3H).

**$^{13}\text{C}$  NMR** (101 MHz,  $\text{CDCl}_3$ )  $\delta$  144.4, 137.1, 135.6, 132.0, 130.4, 129.8, 129.5, 127.0, 120.7, 114.3, 85.4, 77.4, 21.6.

**HRMS** (ESI)  $m/z$ :  $[\text{M} + \text{Na}]^+$  Calcd for  $\text{C}_{15}\text{H}_{12}\text{ClNNaO}_2\text{S}$  328.0174; Found 328.0178.

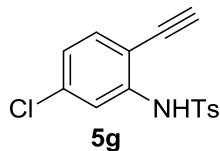

597 mg, overall yield: 65%, brown solid.

**$^1\text{H}$  NMR** (400 MHz,  $\text{CDCl}_3$ )  $\delta$  7.77 – 7.71 (m, 2H), 7.64 (d,  $J$  = 2.0 Hz, 1H), 7.31 – 7.26 (m, 4H), 7.01 (dd,  $J$  = 8.3, 2.0 Hz, 1H), 3.45 (s, 1H), 2.41 (s, 3H).

**$^{13}\text{C}$  NMR** (101 MHz,  $\text{CDCl}_3$ )  $\delta$  144.5, 139.5, 136.2, 135.6, 133.3, 129.8, 127.3, 124.3, 119.3, 110.7, 85.3, 77.7, 21.6.

**HRMS** (ESI)  $m/z$ :  $[\text{M} + \text{Na}]^+$  Calcd for  $\text{C}_{15}\text{H}_{12}\text{ClNNaO}_2\text{S}$  328.0174; Found 328.0179.

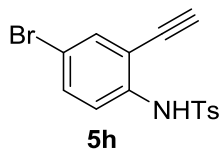

567 mg, overall yield: 54%, brown solid.

**$^1\text{H}$  NMR** (400 MHz,  $\text{CDCl}_3$ )  $\delta$  7.72 – 7.67 (m, 2H), 7.51 (d,  $J$  = 8.8 Hz, 1H), 7.47 (d,  $J$  = 2.3 Hz, 1H), 7.41 (dd,  $J$  = 8.8, 2.3 Hz, 1H), 7.26 (d,  $J$  = 8.1 Hz, 2H), 7.21 (s, 1H), 3.44 (s, 1H), 2.40 (s, 3H).

**$^{13}\text{C}$  NMR** (101 MHz,  $\text{CDCl}_3$ )  $\delta$  144.4, 137.6, 135.6, 134.9, 133.2, 129.8, 127.3, 120.8, 116.8, 114.5, 85.6, 77.2, 21.6.

**HRMS** (ESI)  $m/z$ :  $[\text{M} + \text{Na}]^+$  Calcd for  $\text{C}_{15}\text{H}_{12}\text{BrNNaO}_2\text{S}$  371.9671; Found 371.9676.

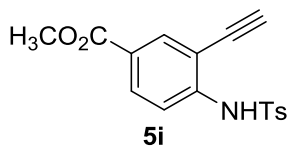

543 mg, overall yield: 55%, yellow solid.

**$^1\text{H}$  NMR** (400 MHz,  $\text{CDCl}_3$ )  $\delta$  8.04 (d,  $J$  = 2.0 Hz, 1H), 7.94 (dd,  $J$  = 8.7, 2.0 Hz, 1H), 7.78 – 7.74 (m, 2H), 7.63 (d,  $J$  = 8.7 Hz, 1H), 7.28 – 7.24 (m, 2H), 3.88 (s, 3H), 3.51 (s, 1H), 2.38 (s, 3H).

**$^{13}\text{C}$  NMR** (101 MHz,  $\text{CDCl}_3$ )  $\delta$  165.6, 144.6, 142.2, 135.6, 134.1, 131.4, 129.9, 127.3, 125.5, 117.2, 111.7, 85.5, 77.6, 52.2, 21.6.

**HRMS** (ESI)  $m/z$ :  $[M + H]^+$  Calcd for  $C_{17}H_{16}NO_4S$  330.0803; Found 330.0807.

### 3. Procedure for the synthesis of coumaran-3-ones and indolin-3-ones

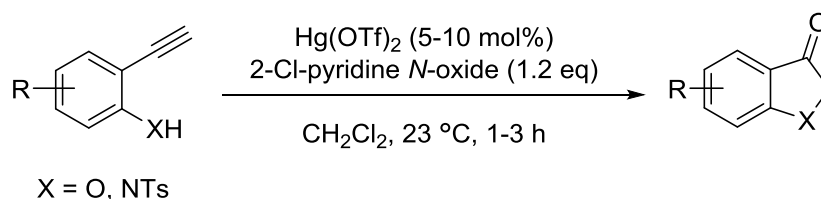

**General procedure:** 2-Cl-pyridine *N*-oxide (77.7 mg, 0.6 mmol) and  $Hg(OTf)_2$  (12.5 mg, 0.025 mmol) were added sequentially to a solution of 2-ethynyl phenol (or 2-ethynyl tosylaniline, 0.5 mmol) in  $CH_2Cl_2$  (2 mL) and the mixture was stirred at 23 °C for 1 h. Then  $CH_2Cl_2$  (10 mL) was added and the resulting mixture was washed sequentially with 0.1 N HCl (10 mL), water (10 mL) and brine (10 mL), dried over anhydrous  $Na_2SO_4$ . The solvent was evaporated and the residue was purified by flash column chromatography (hexane/EtOAc) to give the corresponding coumaran-3-one (or indolin-3-one). Note: 0.05 mmol of  $Hg(OTf)_2$  and 3 h of reaction time were needed for 2-ethynyl tosylanilines.

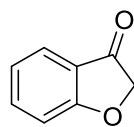

**2a** 61.6 mg, 92%, white solid.

**$^1H$  NMR** (500 MHz,  $CDCl_3$ )  $\delta$  7.68 (dd,  $J = 7.7, 1.4$  Hz, 1H), 7.62 (ddd,  $J = 8.5, 7.2, 1.5$  Hz, 1H), 7.15 (d,  $J = 8.4$  Hz, 1H), 7.12 – 7.07 (m, 1H), 4.63 (s, 2H).

**$^{13}C$  NMR** (126 MHz,  $CDCl_3$ )  $\delta$  199.9, 174.0, 137.9, 124.1, 122.0, 121.2, 113.7, 74.7.

**HRMS** (ESI)  $m/z$ :  $[M + H]^+$  Calcd for  $C_8H_7O_2$  135.0448; Found 135.0444.

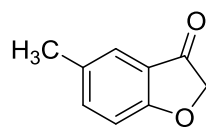

**2b** 65.9 mg, 89%, white solid.

**$^1H$  NMR** (400 MHz,  $CDCl_3$ )  $\delta$  7.49 – 7.40 (m, 2H), 7.04 (dd,  $J = 8.4, 2.0$  Hz, 1H), 4.66 – 4.58 (m, 2H), 2.37 (s, 3H).

**$^{13}C$  NMR** (101 MHz,  $CDCl_3$ )  $\delta$  200.0, 172.5, 139.2, 131.6, 123.4, 121.0, 113.2, 74.96, 20.6.

**HRMS** (ESI)  $m/z$ :  $[M + H]^+$  Calcd for  $C_9H_9O_2$  149.0604; Found 149.0609.

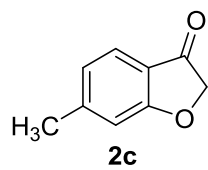

63.6 mg, 86%, white solid.

**$^1H$  NMR** (400 MHz,  $CDCl_3$ )  $\delta$  7.56 (d,  $J = 7.9$  Hz, 1H), 6.95 (dt,  $J = 1.5, 0.8$  Hz, 1H), 6.92 (dd,  $J = 7.9, 1.2$  Hz, 1H), 4.62 (s, 2H), 2.45 (s, 3H).

**$^{13}C$  NMR** (101 MHz,  $CDCl_3$ )  $\delta$  199.2, 174.6, 150.0, 123.6, 123.6, 118.8, 113.6, 74.95, 22.5.

**HRMS** (ESI)  $m/z$ :  $[M + H]^+$  Calcd for  $C_9H_9O_2$  149.0604; Found 149.0610.

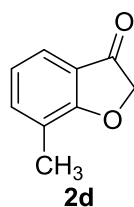

62.9 mg, 85%, white solid.

**$^1H$  NMR** (400 MHz,  $CDCl_3$ )  $\delta$  7.57 – 7.48 (m, 1H), 7.44 (dt,  $J = 7.3, 1.1$  Hz, 1H), 7.02 (t,  $J = 7.5$  Hz, 1H), 4.66 (s, 2H), 2.35 (s, 3H).

**$^{13}C$  NMR** (101 MHz,  $CDCl_3$ )  $\delta$  200.4, 172.8, 138.2, 123.8, 121.9, 121.3, 120.6, 74.70, 14.2.

**IR (neat)**: 2930, 1710, 1618, 1492, 1422, 1288, 1130, 815, 726.

**HRMS** (ESI)  $m/z$ :  $[M + H]^+$  Calcd for  $C_9H_9O_2$  149.0604; Found 149.0606.

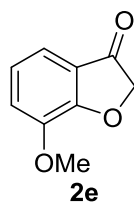

69.7 mg, 85%, white solid.

**$^1H$  NMR** (400 MHz,  $CDCl_3$ )  $\delta$  7.24 (dd,  $J = 7.7, 1.2$  Hz, 1H), 7.10 (dd,  $J = 7.9, 1.2$  Hz, 1H), 7.01 (t,  $J = 7.8$  Hz, 1H), 4.66 (s, 2H), 3.95 (s, 3H).

**$^{13}C$  NMR** (101 MHz,  $CDCl_3$ )  $\delta$  199.7, 164.0, 146.8, 122.5, 122.4, 118.3, 115.1, 75.1, 56.2.

**HRMS** (ESI)  $m/z$ :  $[M + H]^+$  Calcd for  $C_9H_8NaO_3$  187.0373; Found 187.0377.

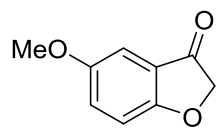

**2f** 72.2 mg, 88%, white solid.

**$^1H$  NMR** (400 MHz,  $CDCl_3$ )  $\delta$  7.26 (dd,  $J$  = 9.0, 2.8 Hz, 1H), 7.10 – 7.06 (m, 2H), 4.65 (s, 2H), 3.82 (s, 3H).

**$^{13}C$  NMR** (101 MHz,  $CDCl_3$ )  $\delta$  200.1, 169.4, 155.0, 127.9, 121.1, 114.5, 103.8, 75.46, 55.9.

**HRMS** (ESI)  $m/z$ :  $[M + H]^+$  Calcd for  $C_9H_8NaO_3$  187.0373; Found 187.0379.

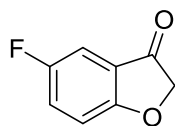

**2g** 68.4 mg, 90%, white solid.

**$^1H$  NMR** (400 MHz,  $CDCl_3$ )  $\delta$  7.39 – 7.30 (m, 2H), 7.14 – 7.09 (m, 1H), 4.68 (s, 2H).

**$^{13}C$  NMR** (101 MHz,  $CDCl_3$ )  $\delta$  199.3, 170.2, 157.8 (d,  $J$  = 244.4 Hz), 125.6 (d,  $J$  = 26.3 Hz), 121.6 (d,  $J$  = 8.1 Hz), 114.8 (d,  $J$  = 8.1 Hz), 109.1 (d,  $J$  = 24.2 Hz), 75.7.

**HRMS** (ESI)  $m/z$ :  $[M + Na]^+$  Calcd for  $C_8H_5FNaO_2$  175.0173; Found 175.0179.

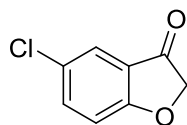

**2h** 80.9 mg, 96%, white solid.

**$^1H$  NMR** (400 MHz,  $CDCl_3$ )  $\delta$  7.65 – 7.60 (m, 1H), 7.55 (dd,  $J$  = 8.8, 2.4 Hz, 1H), 7.10 (d,  $J$  = 8.8 Hz, 1H), 4.67 (s, 2H).

**$^{13}C$  NMR** (101 MHz,  $CDCl_3$ )  $\delta$  198.4, 172.2, 137.7, 127.6, 123.5, 122.3, 115.0, 75.4.

**HRMS** (ESI)  $m/z$ :  $[M + Na]^+$  Calcd for  $C_8H_5ClNaO_2$  190.9875; Found 190.9871.

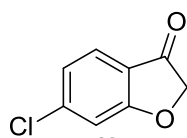

**2i** 78.4 mg, 93%, white solid.

**$^1\text{H}$  NMR** (400 MHz,  $\text{CDCl}_3$ )  $\delta$  7.62 (d,  $J$  = 8.2 Hz, 1H), 7.19 (d,  $J$  = 1.6 Hz, 1H), 7.10 (dd,  $J$  = 8.2, 1.6 Hz, 1H), 4.68 (s, 2H).

**$^{13}\text{C}$  NMR** (101 MHz,  $\text{CDCl}_3$ )  $\delta$  198.2, 174.1, 144.2, 124.8, 123.1, 119.8, 114.1, 75.3.

**HRMS** (ESI)  $m/z$ :  $[\text{M} + \text{Na}]^+$  Calcd for  $\text{C}_8\text{H}_5\text{ClNaO}_2$  190.9875; Found 190.9878.

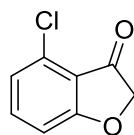

**2j** 76.7 mg, 91%, white solid.

**$^1\text{H}$  NMR** (400 MHz,  $\text{CDCl}_3$ )  $\delta$  7.51 (dd,  $J$  = 8.4, 7.8 Hz, 1H), 7.03 (m, 2H), 4.66 (s, 2H).

**$^{13}\text{C}$  NMR** (101 MHz,  $\text{CDCl}_3$ )  $\delta$  196.7, 174.6, 138.0, 131.7, 123.1, 118.3, 112.1, 75.0.

**HRMS** (ESI)  $m/z$ :  $[\text{M} + \text{Na}]^+$  Calcd for  $\text{C}_8\text{H}_5\text{ClNaO}_2$  190.9875; Found 190.9876.

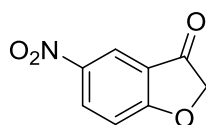

**2k** 85.0 mg, 95%, light yellow solid.

**$^1\text{H}$  NMR** (400 MHz,  $\text{CDCl}_3$ )  $\delta$  8.61 (d,  $J$  = 2.5 Hz, 1H), 8.55 (dd,  $J$  = 9.1, 2.5 Hz, 1H), 7.33 – 7.26 (m, 1H), 4.85 (s, 2H).

**$^{13}\text{C}$  NMR** (101 MHz,  $\text{CDCl}_3$ )  $\delta$  197.2, 176.5, 143.0, 132.8, 121.5, 121.0, 114.4, 76.4.

**HRMS** (ESI)  $m/z$ :  $[\text{M} + \text{H}]^+$  Calcd for  $\text{C}_8\text{H}_6\text{NO}_4$  180.0296; Found 180.0292.

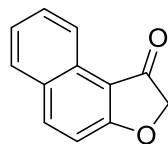

**2l** 84.6 mg, 92%, white solid.

**$^1\text{H}$  NMR** (400 MHz,  $\text{CDCl}_3$ )  $\delta$  8.79 (dq,  $J$  = 8.3, 0.9 Hz, 1H), 8.09 (d,  $J$  = 9.0 Hz, 1H), 7.86 (dt,  $J$  = 8.2, 0.9 Hz, 1H), 7.69 (ddd,  $J$  = 8.3, 7.0, 1.3 Hz, 1H), 7.50 (ddd,  $J$  = 8.3, 7.0, 1.3 Hz, 1H), 7.32 – 7.26 (m, 1H), 4.78 (s, 2H).

**$^{13}\text{C}$  NMR** (101 MHz,  $\text{CDCl}_3$ )  $\delta$  199.3, 176.7, 139.8, 129.9, 129.2, 129.1, 128.5, 125.5, 123.2, 114.0, 113.3, 75.5.

**HRMS** (ESI)  $m/z$ :  $[M + H]^+$  Calcd for  $C_{12}H_9O_2$  185.0605; Found 180.0601.

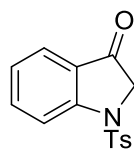

**6a** 122.0 mg, 85%, light yellow solid.

**$^1H$  NMR** (400 MHz,  $CDCl_3$ )  $\delta$  8.06 (dd,  $J = 8.4, 0.8$  Hz, 1H), 7.74 (d,  $J = 8.4$  Hz, 2H), 7.70 – 7.65 (m, 2H), 7.32 – 7.26 (m, 2H), 7.23 – 7.17 (m, 1H), 4.15 (s, 2H), 2.40 (s, 3H).

**$^{13}C$  NMR** (101 MHz,  $CDCl_3$ )  $\delta$  194.8, 153.6, 145.2, 137.3, 133.5, 130.1, 127.1, 125.0, 124.4, 124.0, 115.9, 56.1, 21.6.

**HRMS** (ESI)  $m/z$ :  $[M + H]^+$  Calcd for  $C_{15}H_{14}NO_3S$  288.0699; Found 288.0695.

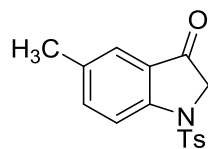

**6b** 134.0 mg, 89%, light yellow solid.

**$^1H$  NMR** (400 MHz,  $CDCl_3$ )  $\delta$  7.95 (d,  $J = 8.5$  Hz, 1H), 7.73 – 7.68 (m, 2H), 7.50 (dd,  $J = 8.5, 1.9$  Hz, 1H), 7.44 (dt,  $J = 1.9, 0.9$  Hz, 1H), 7.27 (d,  $J = 8.3$  Hz, 2H), 4.12 (s, 2H), 2.39 (s, 3H), 2.37 (s, 3H).

**$^{13}C$  NMR** (101 MHz,  $CDCl_3$ )  $\delta$  194.9, 151.8, 145.0, 138.5, 134.2, 133.3, 130.0, 127.2, 125.2, 124.0, 115.9, 56.4, 21.6, 20.6.

**HRMS** (ESI)  $m/z$ :  $[M + H]^+$  Calcd for  $C_{16}H_{16}NO_3S$  302.0852; Found 302.0857.

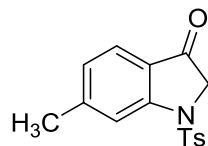

**6c** 132.4 mg, 88%, light yellow solid.

**$^1H$  NMR** (400 MHz,  $CDCl_3$ )  $\delta$  7.87 (dt,  $J = 1.5, 0.7$  Hz, 1H), 7.75 – 7.70 (m, 2H), 7.54 (d,  $J = 7.9$  Hz, 1H), 7.29 (d,  $J = 7.7$  Hz, 2H), 7.01 (ddd,  $J = 7.9, 1.4, 0.7$  Hz, 1H), 4.12 (s, 2H), 2.52 (s, 3H), 2.41 (s, 3H).

**$^{13}C$  NMR** (101 MHz,  $CDCl_3$ )  $\delta$  194.2, 154.0, 149.3, 145.1, 133.6, 130.1, 127.1, 125.6, 124.1, 122.9, 116.0, 56.4, 22.8, 21.6.

**HRMS** (ESI)  $m/z$ :  $[M + H]^+$  Calcd for  $C_{16}H_{16}NO_3S$  302.0852; Found 302.0855.

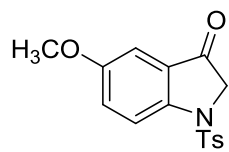

**6d** 145.8 mg, 92%, yellow solid.

**$^1H$  NMR** (400 MHz,  $CDCl_3$ )  $\delta$  8.00 (dd,  $J = 9.1, 0.5$  Hz, 1H), 7.71 – 7.65 (m, 2H), 7.34 – 7.24 (m, 3H), 7.05 (d,  $J = 2.7$  Hz, 1H), 4.13 (s, 2H), 3.81 (s, 3H), 2.39 (s, 3H).

**$^{13}C$  NMR** (101 MHz,  $CDCl_3$ )  $\delta$  194.9, 156.8, 148.3, 145.1, 133.0, 130.1, 127.2, 126.6, 126.1, 117.7, 104.8, 56.7, 55.8, 21.6.

**HRMS** (ESI)  $m/z$ :  $[M + H]^+$  Calcd for  $C_{16}H_{16}NO_4S$  318.0802; Found 318.0806.

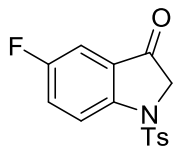

**6e** 122.0 mg, 80%, yellow solid.

**$^1H$  NMR** (400 MHz,  $CDCl_3$ )  $\delta$  8.04 (dd,  $J = 9.1, 3.9$  Hz, 1H), 7.68 (d,  $J = 8.1$  Hz, 2H), 7.40 (td,  $J = 8.7, 2.8$  Hz, 1H), 7.30 – 7.25 (m, 3H), 4.16 (s, 2H), 2.39 (s, 3H).

**$^{13}C$  NMR** (101 MHz,  $CDCl_3$ )  $\delta$  193.9 (d,  $J = 3.0$  Hz), 160.6, 158.1, 149.9, 145.4, 133.1, 130.2, 127.2, 124.8 (d,  $J = 25.3$  Hz), 117.7 (d,  $J = 8.1$  Hz), 109.9 (d,  $J = 24.2$  Hz), 56.8, 21.6.

**HRMS** (ESI)  $m/z$ :  $[M + Na]^+$  Calcd for  $C_{15}H_{12}FNNaO_3S$  328.0423; Found 328.0426.

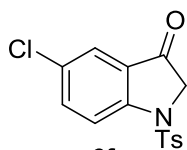

**6f** 135.2 mg, 84%, yellow solid.

**$^1H$  NMR** (400 MHz,  $CDCl_3$ )  $\delta$  8.02 (d,  $J = 8.8$  Hz, 1H), 7.74 – 7.70 (m, 2H), 7.65 – 7.59 (m, 2H), 7.31 (d,  $J = 8.1$  Hz, 2H), 4.17 (s, 2H), 2.42 (s, 3H).

**$^{13}C$  NMR** (101 MHz,  $CDCl_3$ )  $\delta$  193.4, 151.9, 145.5, 137.1, 133.1, 130.2, 130.1, 127.1, 126.3, 123.9, 117.2, 56.5, 21.6.

**HRMS** (ESI)  $m/z$ :  $[M + Na]^+$  Calcd for  $C_{15}H_{12}ClNNaO_3S$  344.0125; Found 344.0123.



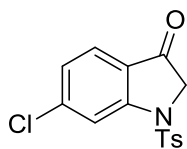

**6g** 127.2 mg, 79%, yellow solid.

**$^1\text{H}$  NMR** (400 MHz,  $\text{CDCl}_3$ )  $\delta$  8.06 (d,  $J$  = 1.6 Hz, 1H), 7.73 (d,  $J$  = 8.2 Hz, 2H), 7.56 (d,  $J$  = 8.3 Hz, 1H), 7.32 (d,  $J$  = 8.1 Hz, 2H), 7.14 (dd,  $J$  = 8.2, 1.6 Hz, 1H), 4.14 (s, 2H), 2.41 (s, 3H).

**$^{13}\text{C}$  NMR** (101 MHz,  $\text{CDCl}_3$ )  $\delta$  193.3, 154.1, 145.6, 144.0, 133.3, 130.3, 127.1, 125.3, 124.8, 123.4, 116.0, 56.3, 21.6.

**HRMS** (ESI)  $m/z$ :  $[\text{M} + \text{Na}]^+$  Calcd for  $\text{C}_{15}\text{H}_{12}\text{ClNNaO}_3\text{S}$  344.0125; Found 344.0127.

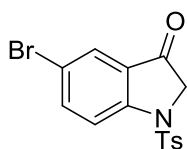

**6h** 137.2 mg, 75%, brown solid.

**$^1\text{H}$  NMR** (400 MHz,  $\text{CDCl}_3$ )  $\delta$  7.94 (d,  $J$  = 9.4 Hz, 1H), 7.74 (dq,  $J$  = 4.3, 2.1 Hz, 2H), 7.72 – 7.67 (m, 2H), 7.29 (d,  $J$  = 8.2 Hz, 2H), 4.14 (s, 2H), 2.40 (s, 3H).

**$^{13}\text{C}$  NMR** (101 MHz,  $\text{CDCl}_3$ )  $\delta$  193.2, 152.4, 145.5, 139.8, 133.2, 130.3, 127.1, 127.1, 126.7, 117.6, 117.3, 56.4, 21.6.

**HRMS** (ESI)  $m/z$ :  $[\text{M} + \text{H}]^+$  Calcd for  $\text{C}_{15}\text{H}_{13}\text{BrNO}_3\text{S}$  365.9802; Found 365.9807.

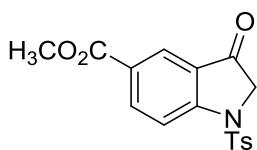

**6i** 126.0 mg, 73%, yellow solid.

**$^1\text{H}$  NMR** (400 MHz,  $\text{CDCl}_3$ )  $\delta$  8.38 – 8.33 (m, 2H), 8.09 (dd,  $J$  = 8.6, 0.8 Hz, 1H), 7.78 – 7.74 (m, 2H), 7.34 – 7.30 (m, 2H), 4.23 (s, 2H), 3.94 (s, 3H), 2.42 (s, 3H).

**$^{13}\text{C}$  NMR** (101 MHz,  $\text{CDCl}_3$ )  $\delta$  193.7, 165.5, 156.2, 145.7, 138.3, 133.4, 130.3, 127.1, 126.5, 126.0, 124.9, 115.4, 56.6, 52.5, 21.6.

**IR** (neat): 2930, 1716, 1602, 1488, 1445, 1363, 1280, 1165, 1090, 1028, 913, 745, 662, 589, 545.

**HRMS** (ESI)  $m/z$ :  $[\text{M} + \text{H}]^+$  Calcd for  $\text{C}_{17}\text{H}_{16}\text{NO}_5\text{S}$  346.0747; Found 346.0743.

#### 4. Procedure for the preparation of compounds 7a-c and 8a'-c'

Compound **7a**,<sup>6</sup> **7b**<sup>7</sup> and **7c**<sup>8</sup> were prepared by reported procedures. **8a'-c'** were prepared by the same procedure as the preparation of coumaran-3-ones.

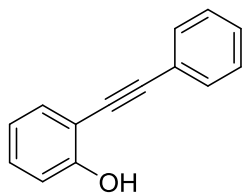

**7a**

305 mg, 91%, colorless oil.

<sup>1</sup>H NMR (400 MHz, CDCl<sub>3</sub>) δ 7.58 - 7.50 (m, 2H), 7.46 - 7.42 (m, 1H), 7.39 - 7.35 (m, 3H), 7.32 - 7.28 (m, 1H), 7.02 - 6.98 (m, 1H), 6.92 (t, J = 7.6 Hz, 1H), 5.84 (br s, 1H). The data is in accordance with the literature.<sup>6</sup>

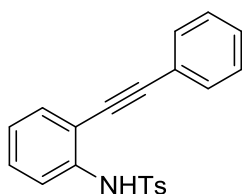

**7b**

425 mg, 82%, yellow solid.

<sup>1</sup>H NMR (400 MHz, CDCl<sub>3</sub>) δ 7.68 (d, J = 8.3 Hz, 2H), 7.63 (d, J = 8.3 Hz, 1H), 7.49 - 7.45 (m, 2H), 7.42 - 7.36 (m, 4H), 7.32 - 7.27 (m, 1H), 7.20 (br s, 1H), 7.17 (d, J = 8.2 Hz, 2H), 7.07 (t, J = 7.6 Hz, 1H), 2.34 (s, 3H). The data is in accordance with the literature.<sup>7</sup>

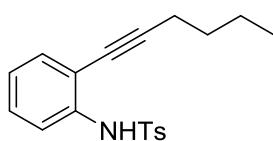

**7c**

363 mg, 84%, yellow solid.

<sup>1</sup>H NMR (400 MHz, CDCl<sub>3</sub>) δ 7.66 (d, J = 7.6 Hz, 2H), 7.57 (d, J = 8.4 Hz, 1H), 7.28 (bs, 1H), 7.22 - 7.17 (m, 4H), 6.96 (t, J = 8.0 Hz, 1H), 2.40 (t, J = 7.2 Hz, 2H), 2.33 (s, 3H), 1.60 - 1.54 (m, 2H), 1.50 - 1.40 (m, 2H), 0.96 (t, J = 7.6 Hz, 3H). The data is in accordance with the literature.<sup>8</sup>

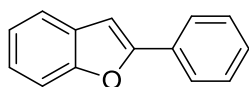

**8a'**, 92.2 mg, 95%, white solid.

**<sup>1</sup>H NMR** (400 MHz, CDCl<sub>3</sub>) δ 7.95 - 7.90 (m, 2H), 7.66 - 7.57 (m, 2H), 7.50 (t, J = 7.6 Hz, 2H), 7.44 - 7.25 (m, 3H), 7.08 - 7.05 (m, 1H).

**<sup>13</sup>C NMR** (101 MHz, CDCl<sub>3</sub>) δ 156.0, 155.0, 130.6, 129.3, 128.8, 128.6, 125.0, 124.3, 123.0, 121.0, 111.2, 101.4.

**HRMS** (ESI) m/z: [M + H]<sup>+</sup> Calcd for C<sub>14</sub>H<sub>11</sub>O 195.0810; Found 195.0814.

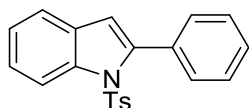

**8b'**, 159.6 mg, 92%, yellow solid.

**<sup>1</sup>H NMR** (400 MHz, CDCl<sub>3</sub>) δ 8.38 (d, J = 8.4 Hz, 1H), 7.57 (dd, J = 7.2, 2.5 Hz, 2H), 7.53 - 7.48 (m, 4H), 7.42 (ddd, J = 8.5, 7.2, 1.4 Hz, 1H), 7.36 - 7.30 (m, 3H), 7.10 (d, J = 8.1 Hz, 2H), 6.61 (s, 1H), 2.35 (s, 3H).

**<sup>13</sup>C NMR** (101 MHz, CDCl<sub>3</sub>) δ 144.5, 142.1, 138.3, 134.7, 132.4, 130.6, 130.3, 129.2, 128.6, 127.5, 126.8, 124.8, 124.3, 120.7, 116.7, 113.6, 21.5.

**HRMS** (ESI) m/z: [M + H]<sup>+</sup> Calcd for C<sub>21</sub>H<sub>18</sub>NO<sub>2</sub>S 348.1058; Found 348.1051.

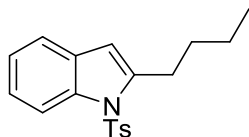

**8c'**, 142.2 mg, 87%, yellow solid.

**<sup>1</sup>H NMR** (400 MHz, CDCl<sub>3</sub>) δ 8.19 (d, J = 8.2 Hz, 1H), 7.64 (d, J = 8.3 Hz, 2H), 7.45 - 7.40 (m, 1H), 7.29 - 7.17 (m, 4H), 6.40 (s, 1H), 3.05 - 2.95 (m, 2H), 2.35 (s, 3H), 1.75 (p, J = 7.6 Hz, 2H), 1.46 (h, J = 7.4 Hz, 2H), 0.98 (t, J = 7.3 Hz, 3H).

**<sup>13</sup>C NMR** (101 MHz, CDCl<sub>3</sub>) δ 144.6, 142.5, 137.2, 136.3, 129.8, 129.7, 126.2, 123.7, 123.4, 120.0, 114.8, 108.6, 31.0, 28.7, 22.5, 21.5, 13.9.

**HRMS** (ESI) m/z: [M + H]<sup>+</sup> Calcd for C<sub>19</sub>H<sub>22</sub>NO<sub>2</sub>S 328.1371; Found 328.1376.

## 5. References

- (1) For compounds **2a-b**, **2g-i** and **2k**, see: (a) Shu, C.; Liu, R.; Liu, S.; Li, J.-Q.; Yu, Y.-F.; He, Q.; Lu, X.; Ye, L.-W. *Chem. Asian J.* **2015**, *10*, 91. For compound **2c**, see: (b) González, A. G.; Barrera, J. B.; Hernández, C. Y. *Heterocycles* **1992**, *34*, 1311. For compound **2e**, see: (c) Jung, M. E.; Abrecht, S. *J. Org. Chem.* **1988**, *53*, 423. For compound **2f**, see: (d) Tomaszewski, Z.; Johnson, M. P.; Huang, X.; Nichols, D. E. *J. Med. Chem.* **1992**, *35*, 2061. For compound **2j**, see: (e) Mulholland, T. P. C.; Honeywood, R. I. W.; Preston, H. D.; Rosevear, D. T. *J. Chem. Soc.* **1965**, 4939. For compound **2i**, see: (f) Anderson, N. G.; Parvez, M.; Keay, B. A. *Org. Lett.* **2000**, *2*, 2817. For compounds **6a-h**, see: (g) Shu, C.; Li, L.; Xiao, X.-Y.; Yu, Y.-F.; Ping, Y.-F.; Zhou, J.-M.; Ye, L.-W. *Chem. Commun.* **2014**, *50*, 8689. For compound **8a'**, see: (h) Duan, X.-F.; Zeng, J.; Zhang, Z.-B.; Zi, G.-F. *J. Org. Chem.* **2007**, *72*, 10283. For compounds **8b'** and **8c'**, see: (i) Yin, Y.; Ma, W.; Chai, Z.; Zhao, G. *J. Org. Chem.* **2007**, *72*, 5731.
- (2) Sahani, R. L.; Patil, M. D.; Wagh, S. B.; Liu, R.-S. *Angew. Chem., Int. Ed.*, **2018**, *57*, 14878.
- (3) Bucher, J.; Wurm, T.; Nalivela, K. S.; Rudolph, M.; Rominger F.; Hashmi, A. S. K. *Angew. Chem., Int. Ed.*, **2014**, *53*, 3854.
- (4) Noyce, D. S.; Nichols, R. *J. Org. Chem.* **1972**, *37*, 4311.
- (5) Beekman, A. M.; O'Connell, M. A.; Howell, L. A. *Angew. Chem., Int. Ed.*, **2017**, *56*, 10446.
- (6) Li, Y.; Gryn'ova, G.; Saenz, F.; Jeanbourquin, X.; Sivula, K.; Corminboeuf, C.; Waser, J. *Chem. Eur. J.* **2017**, *23*, 8058.
- (7) Chong, E.; Blum, S. A. *J. Am. Chem. Soc.* **2015**, *137*, 10144.
- (8) Liu, J.; Xie, X.; Liu, Y. *Chem. Commun.* **2013**, *49*, 11794.

## 6. $^1\text{H}$ NMR and $^{13}\text{C}$ NMR Spectra

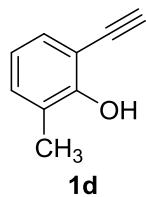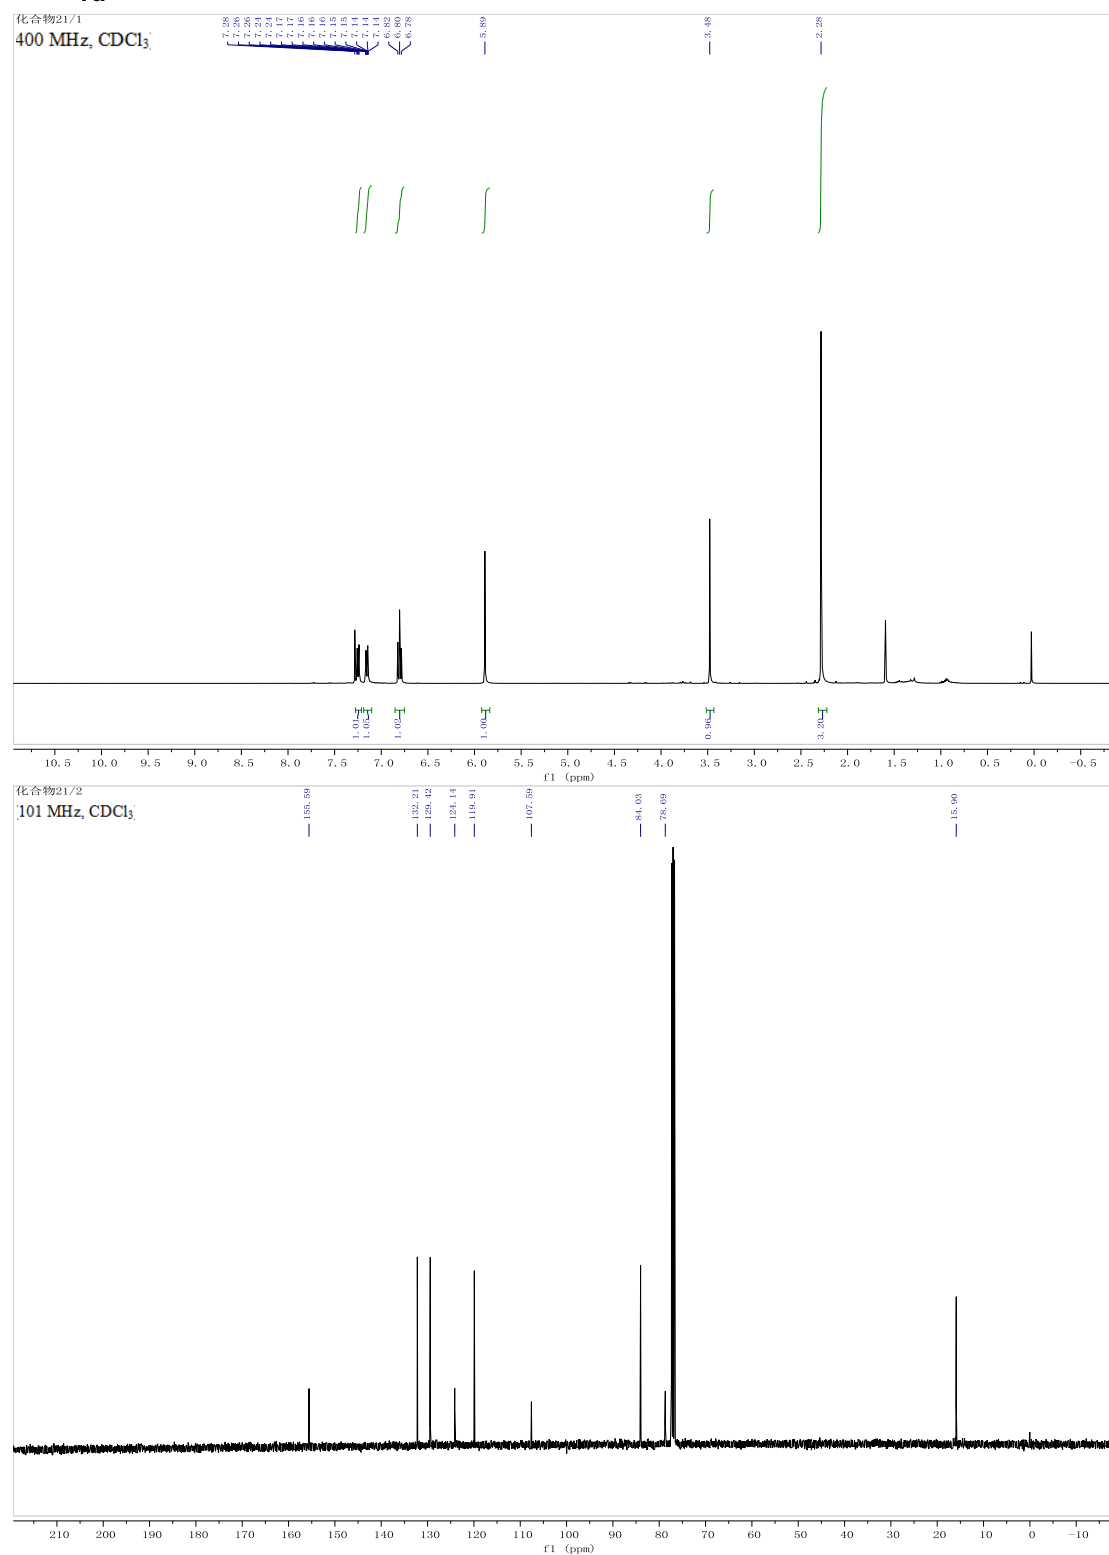

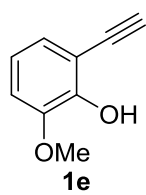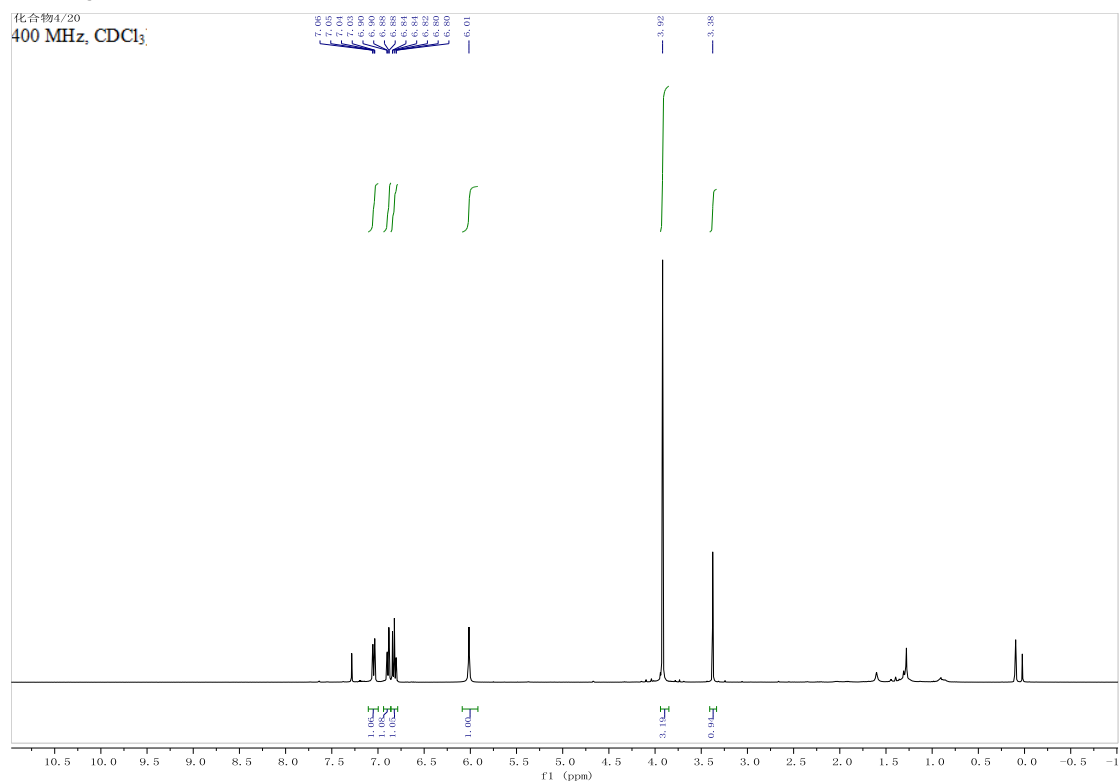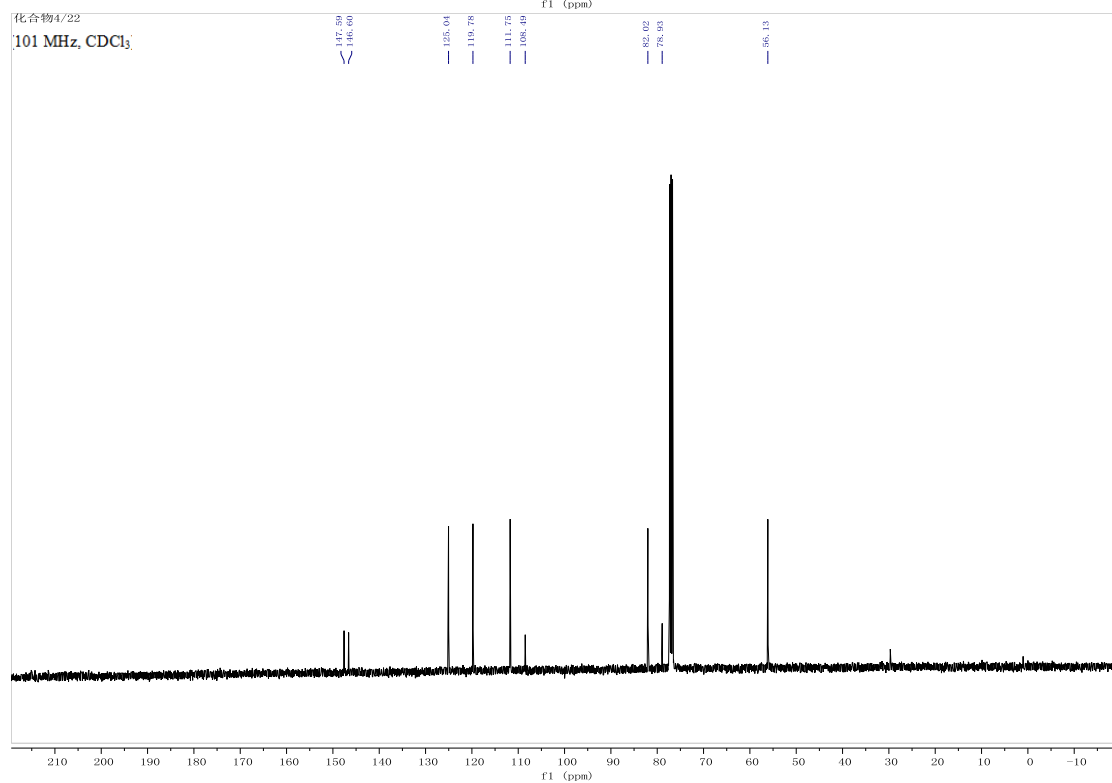

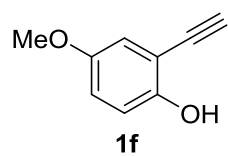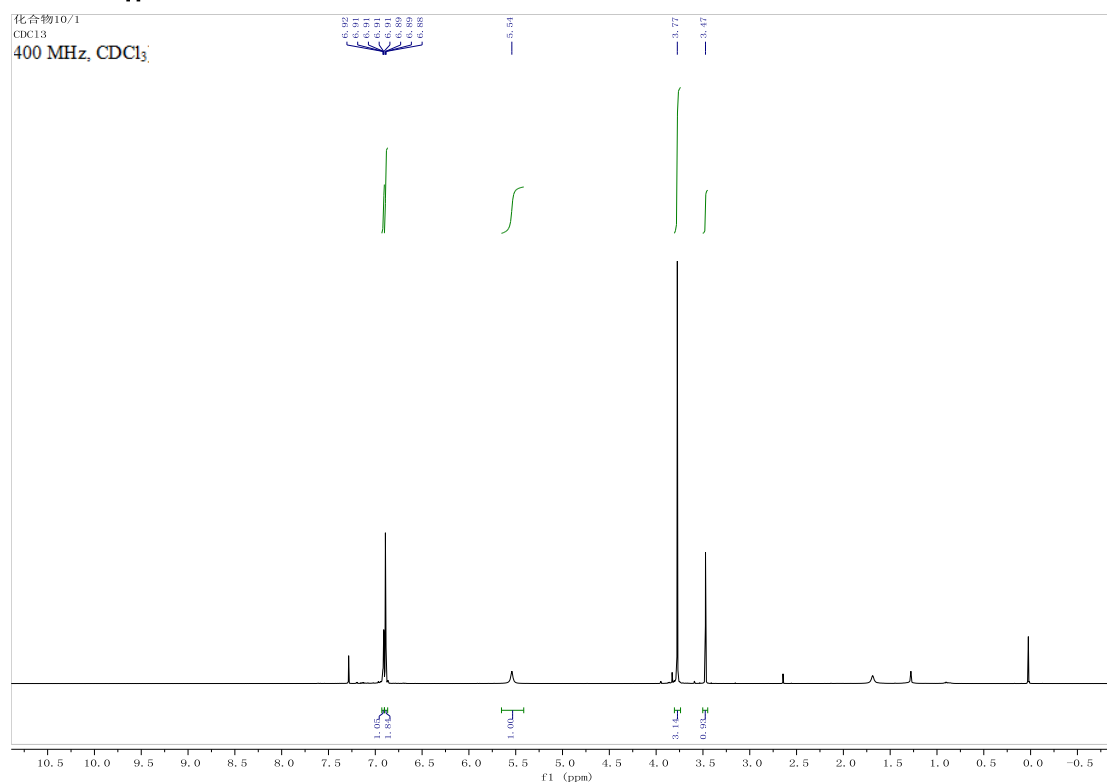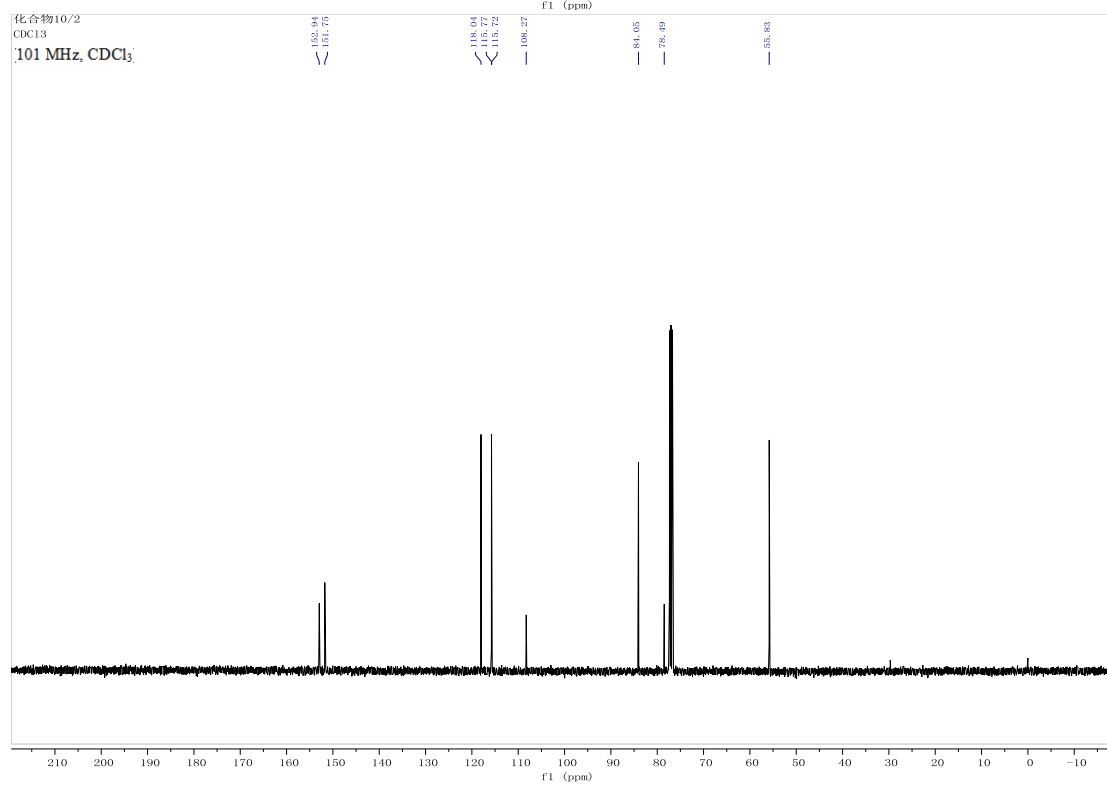

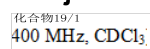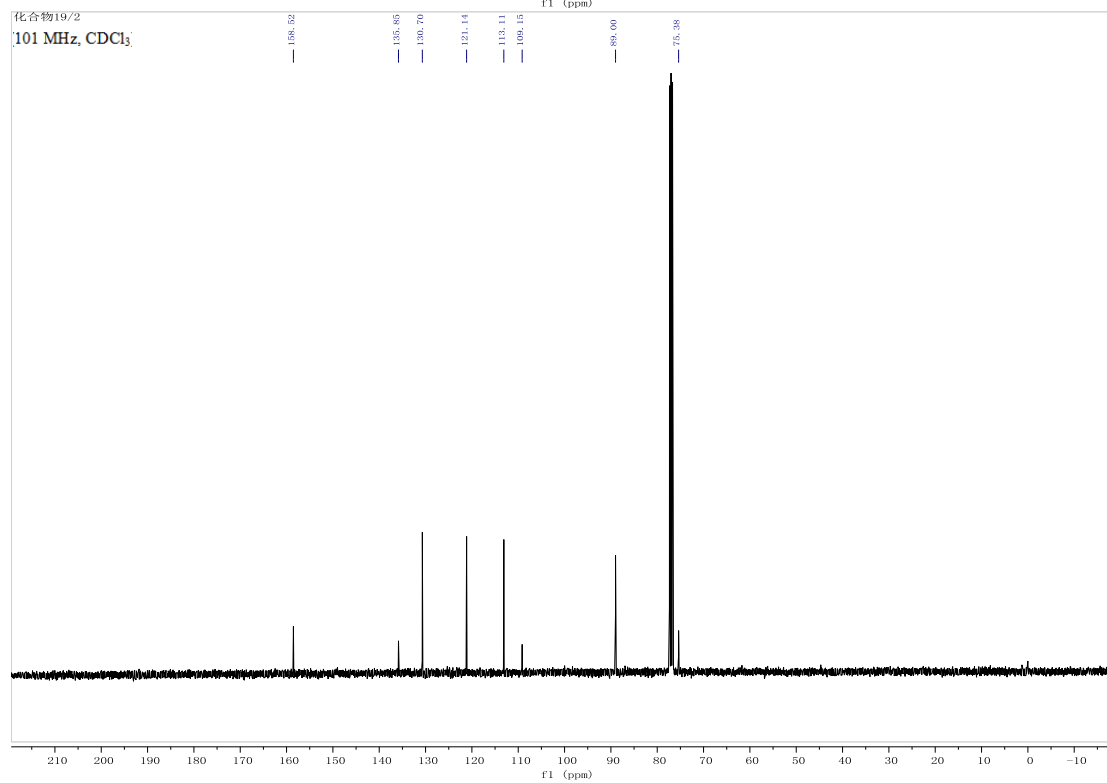



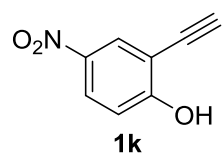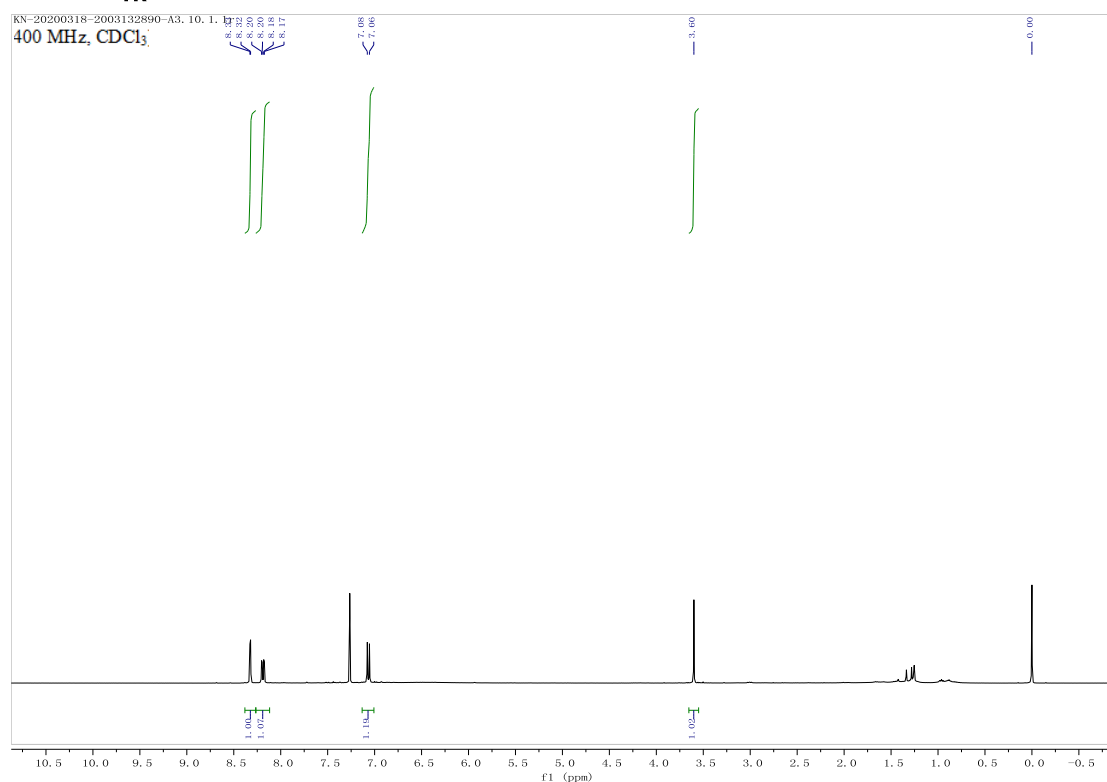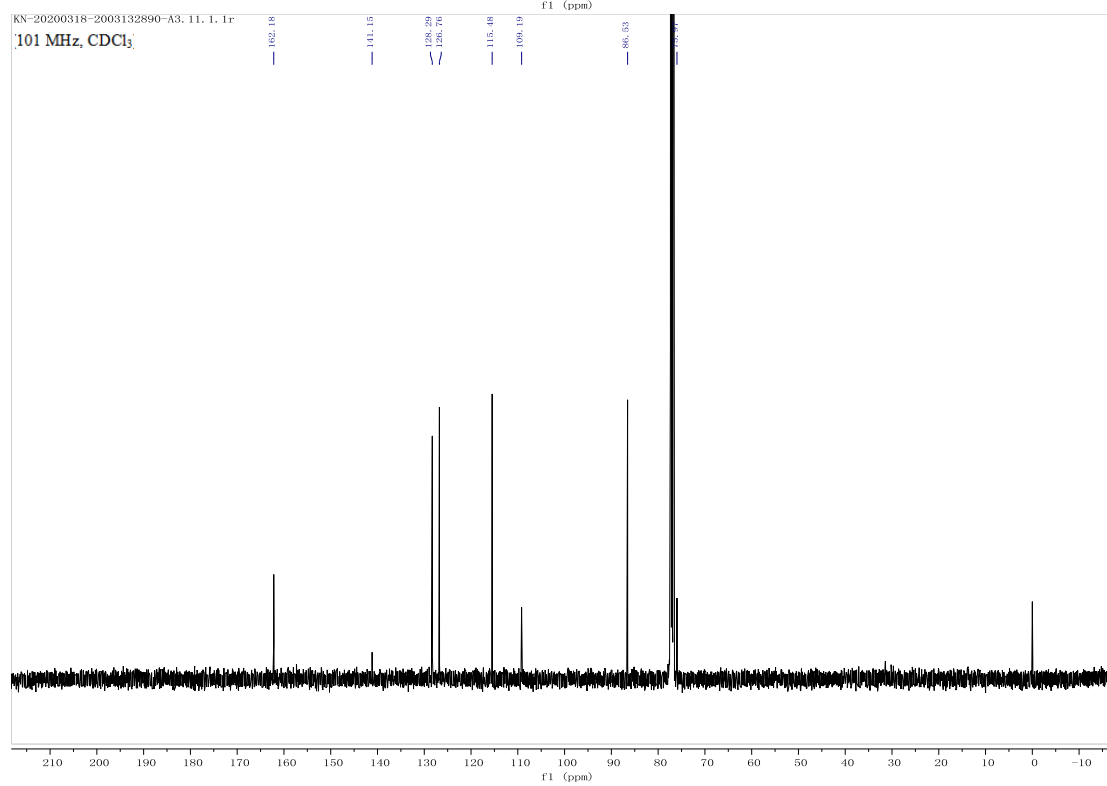

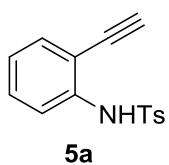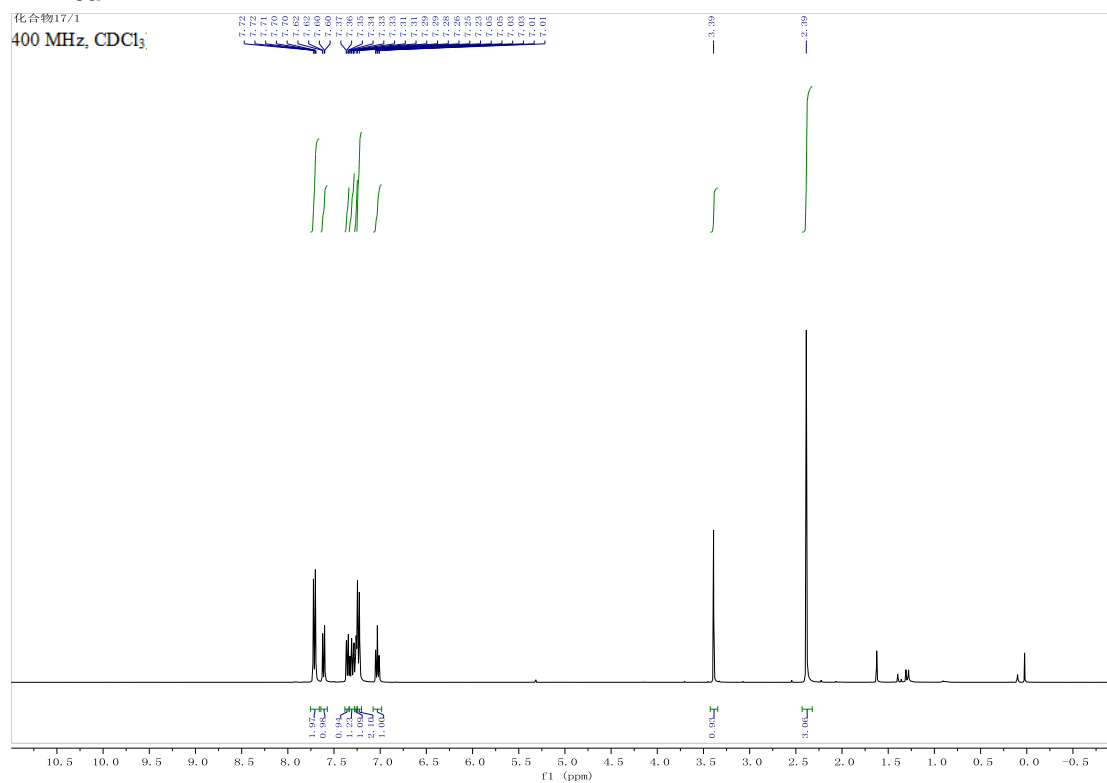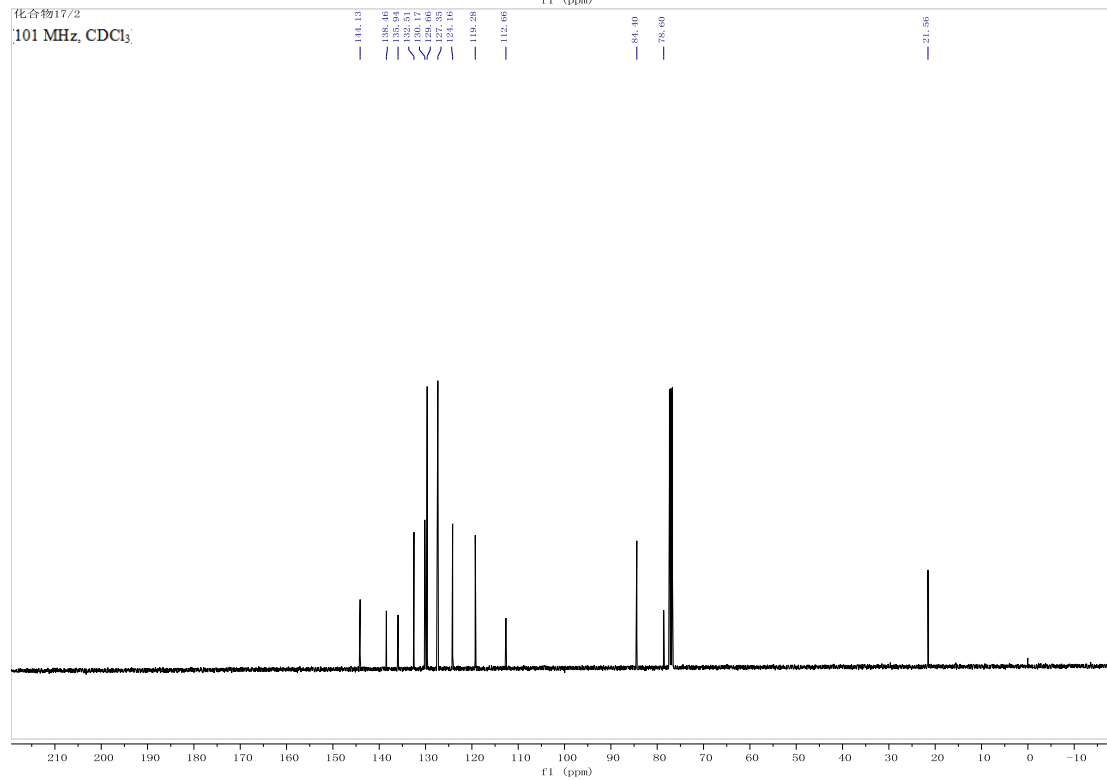

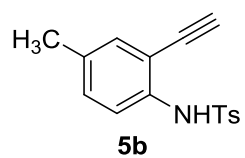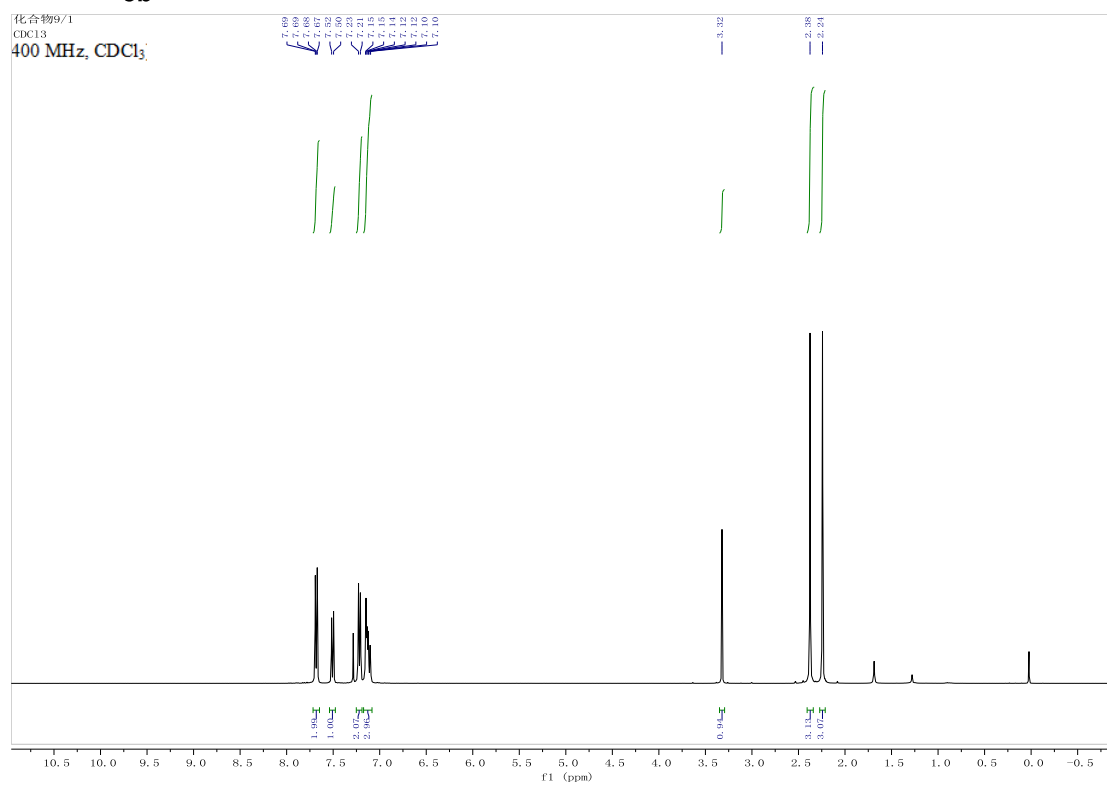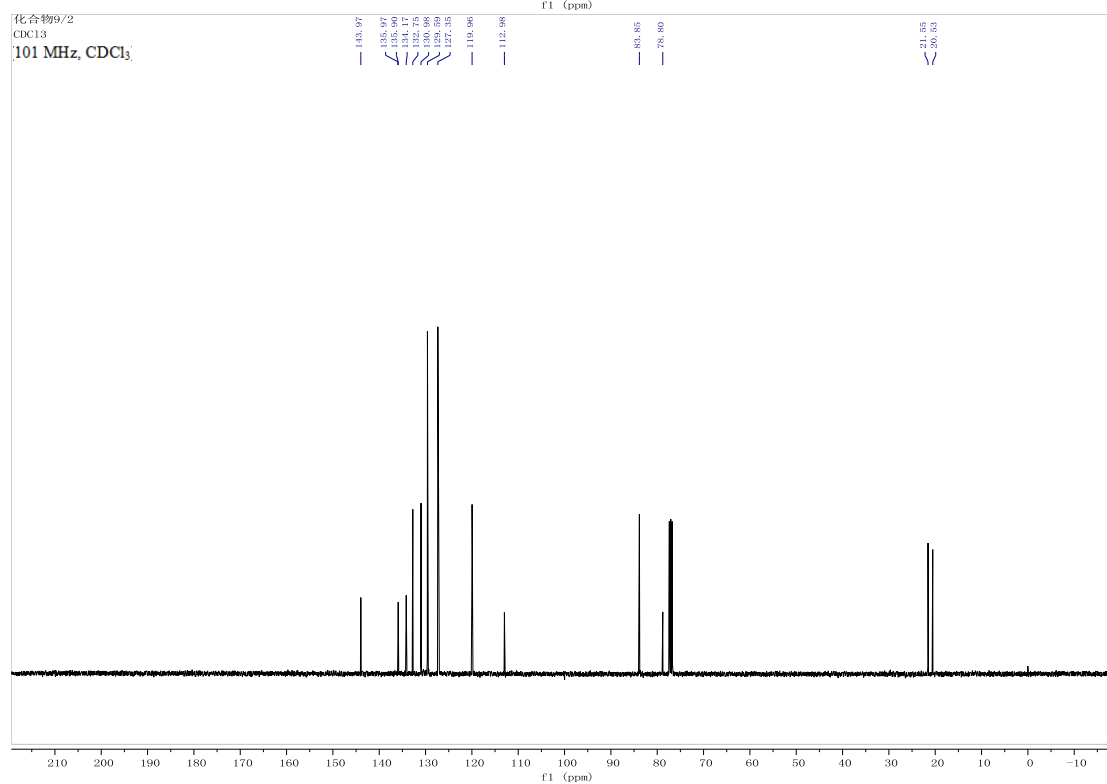

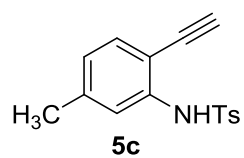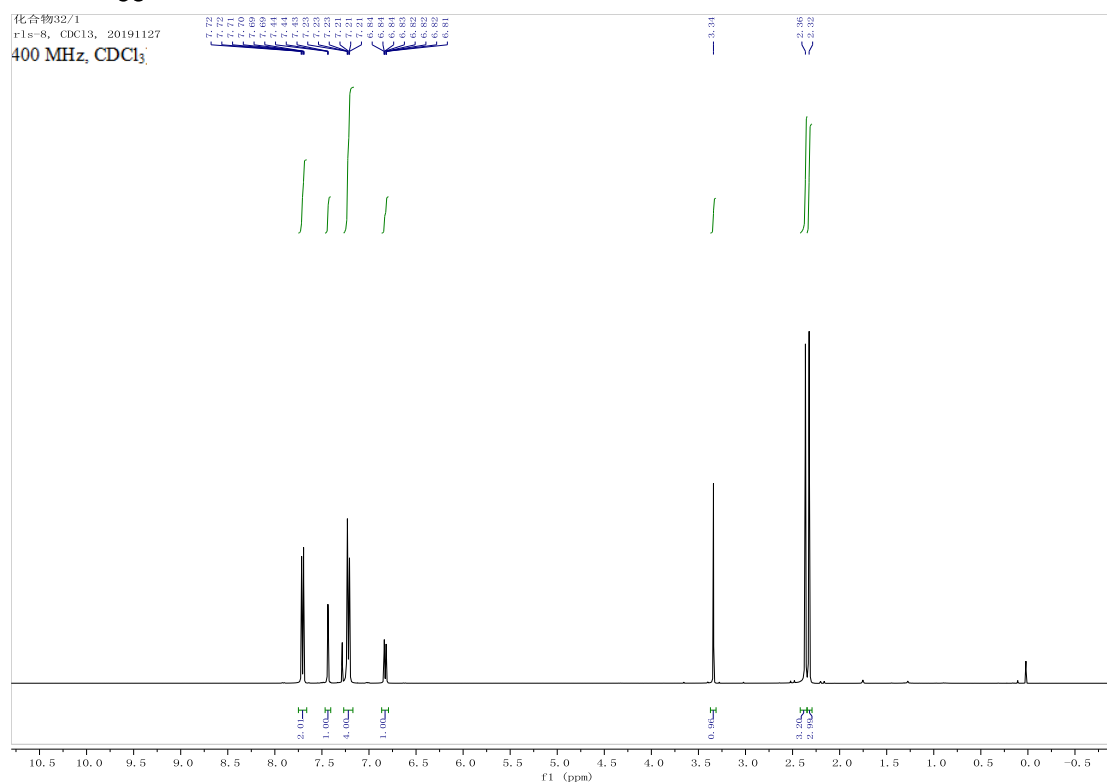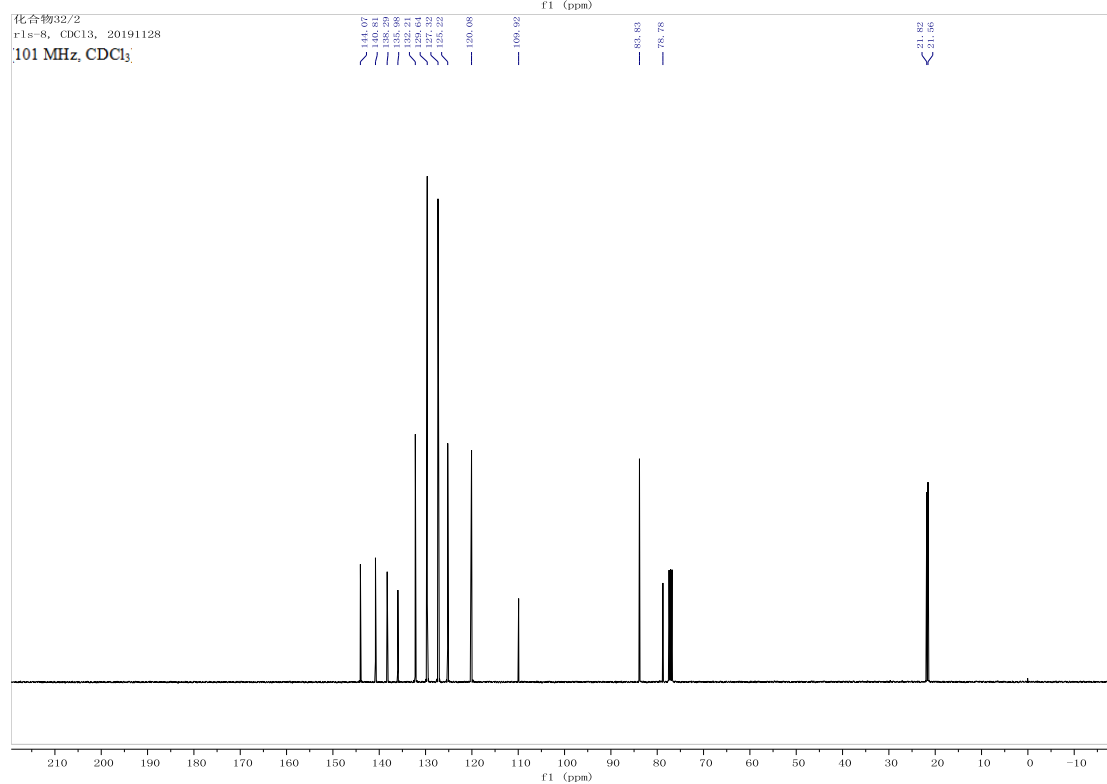

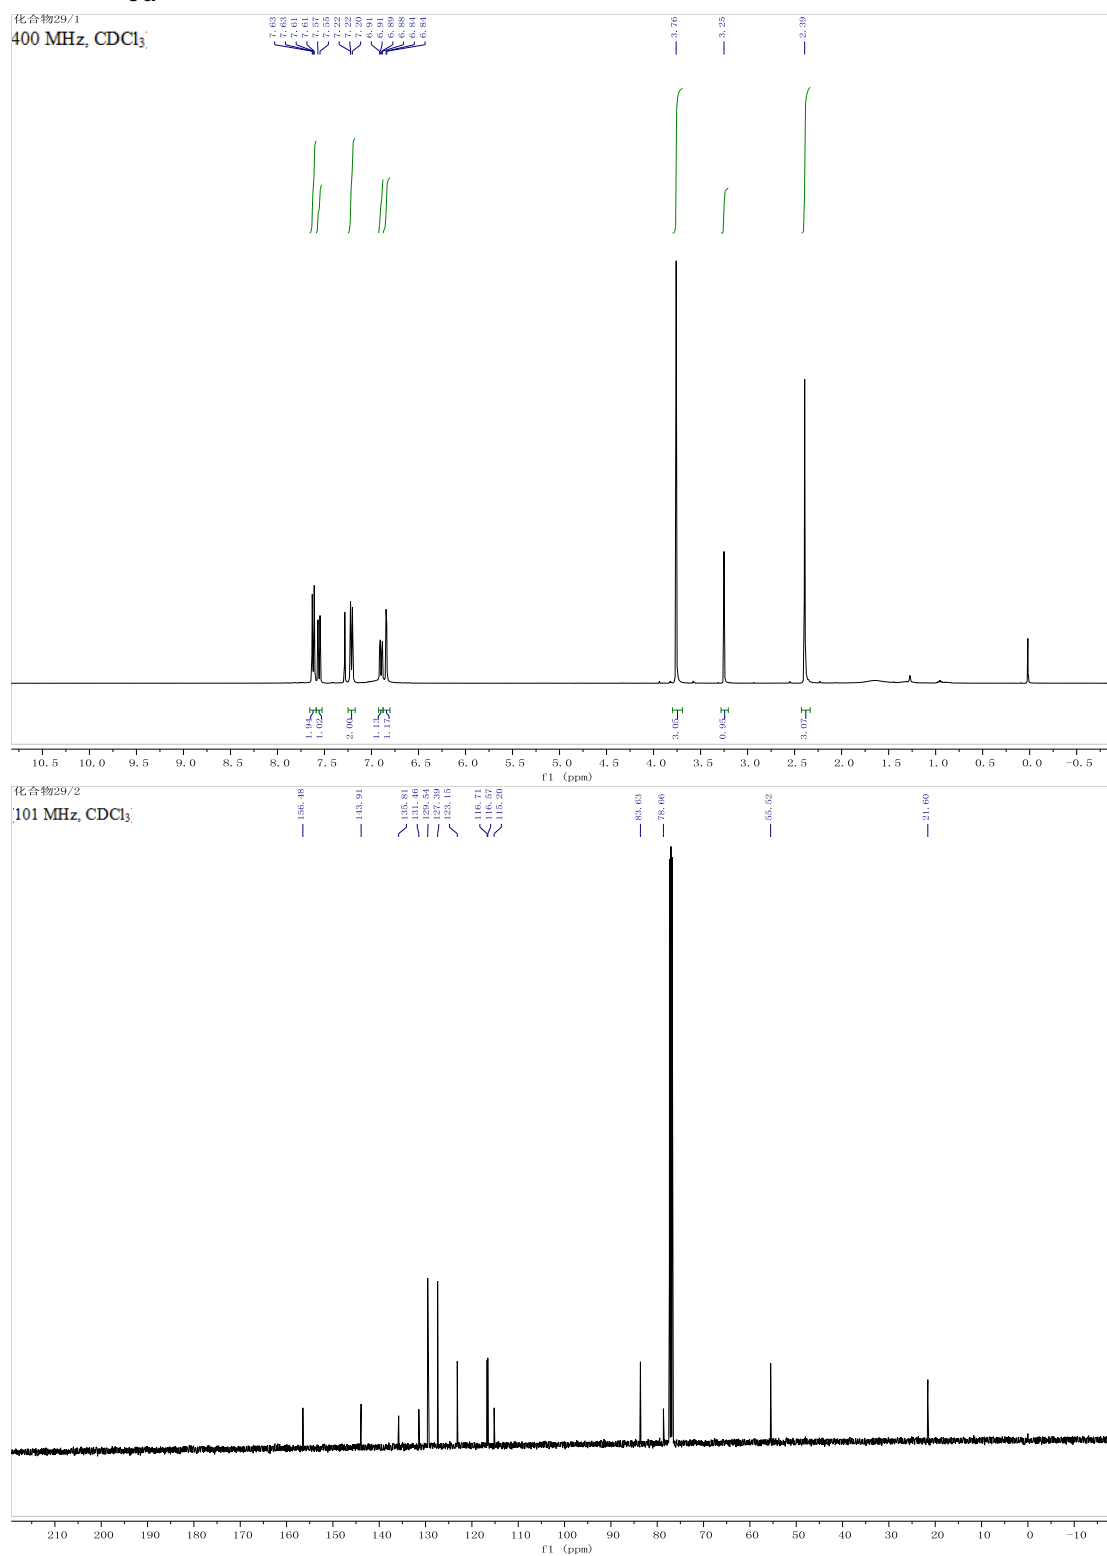

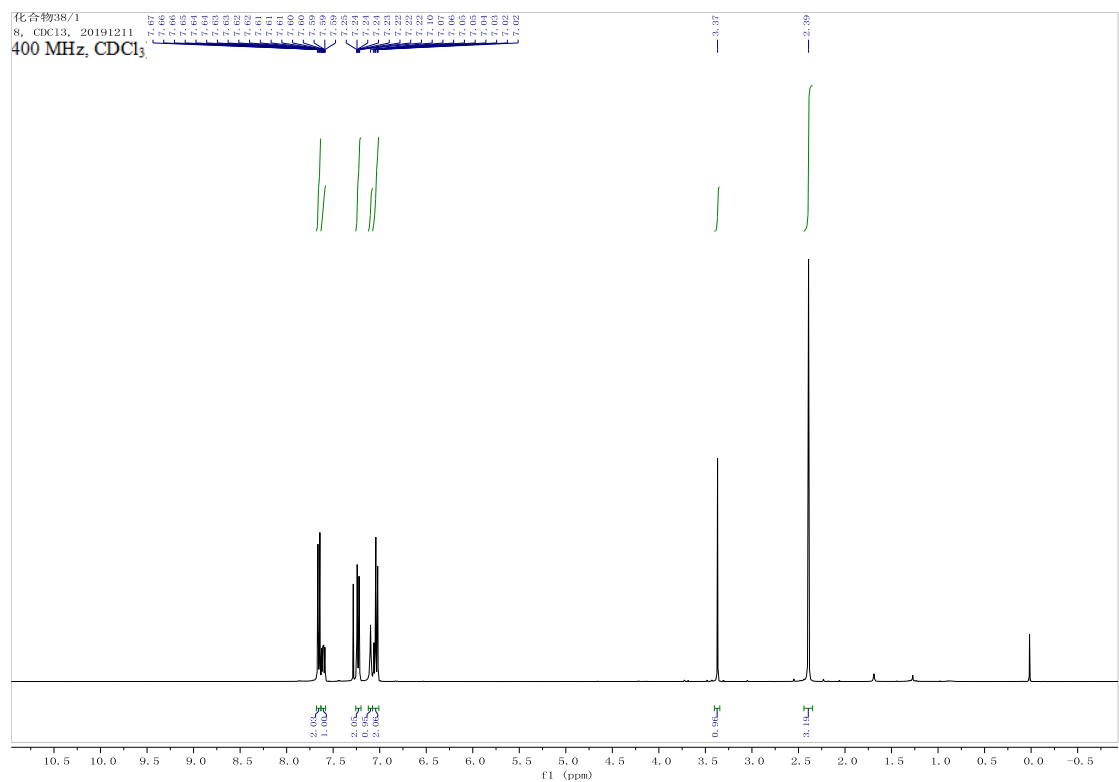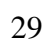

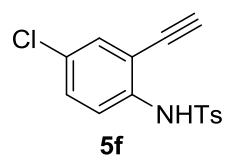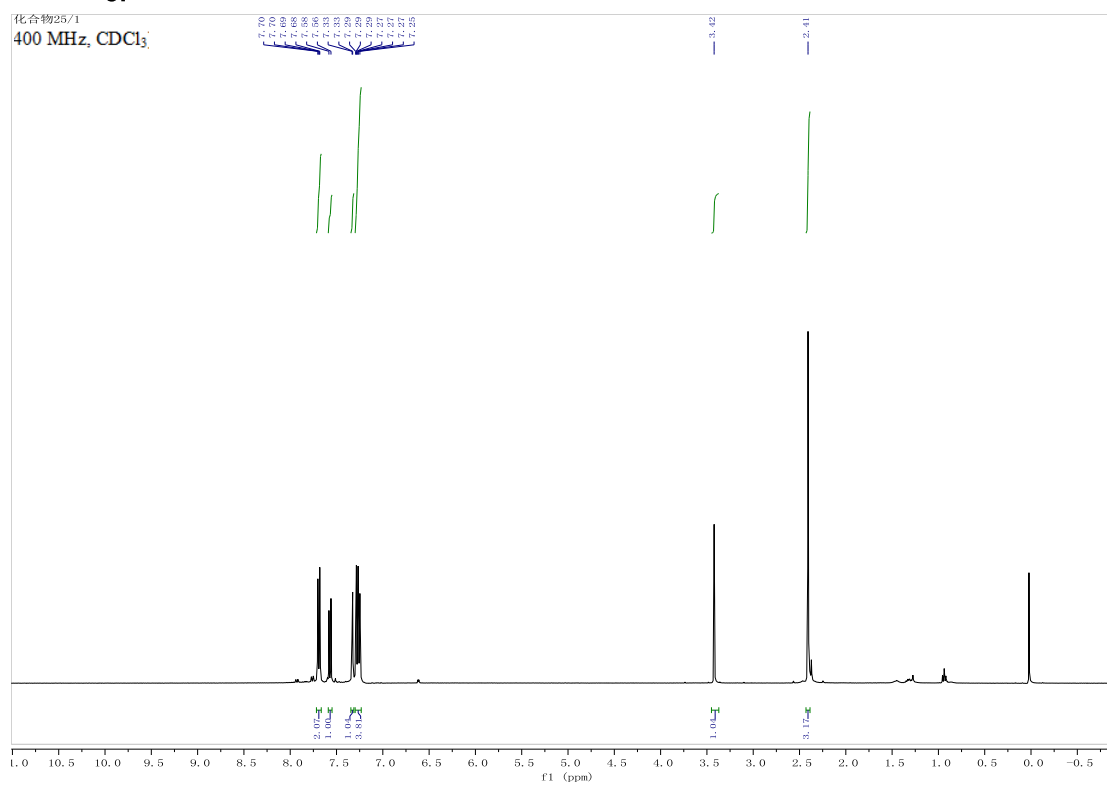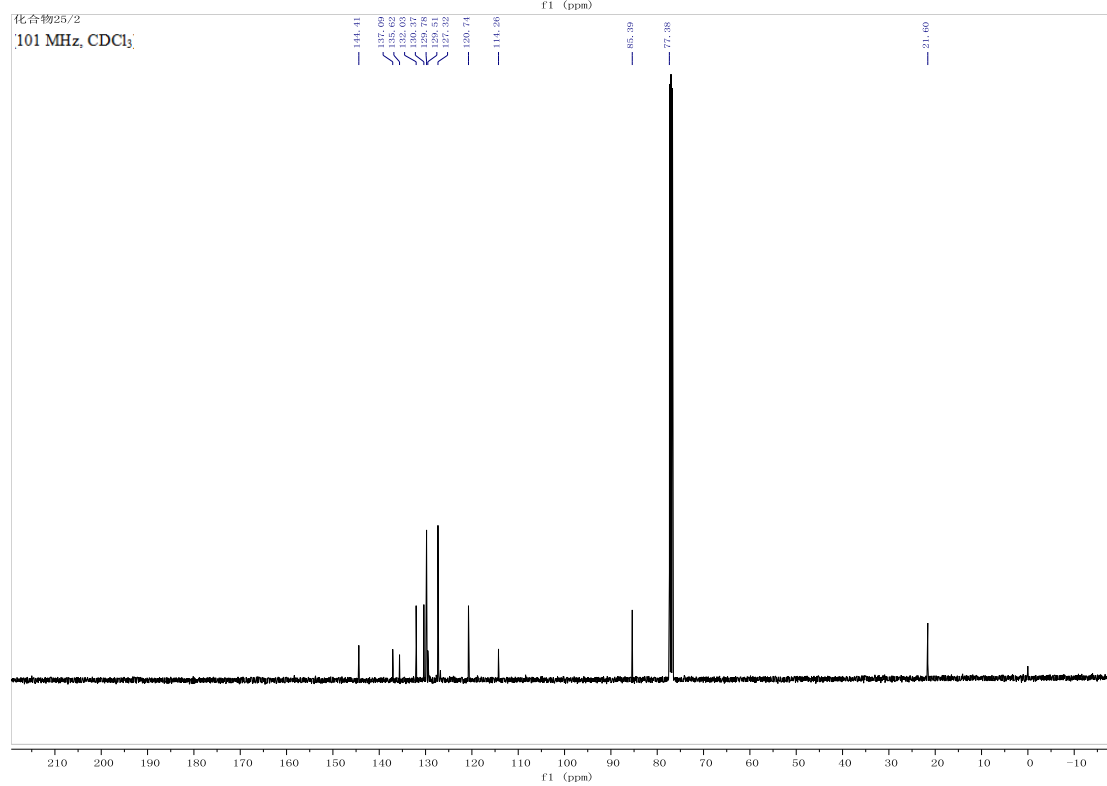

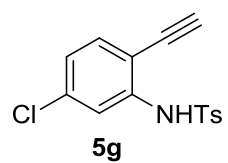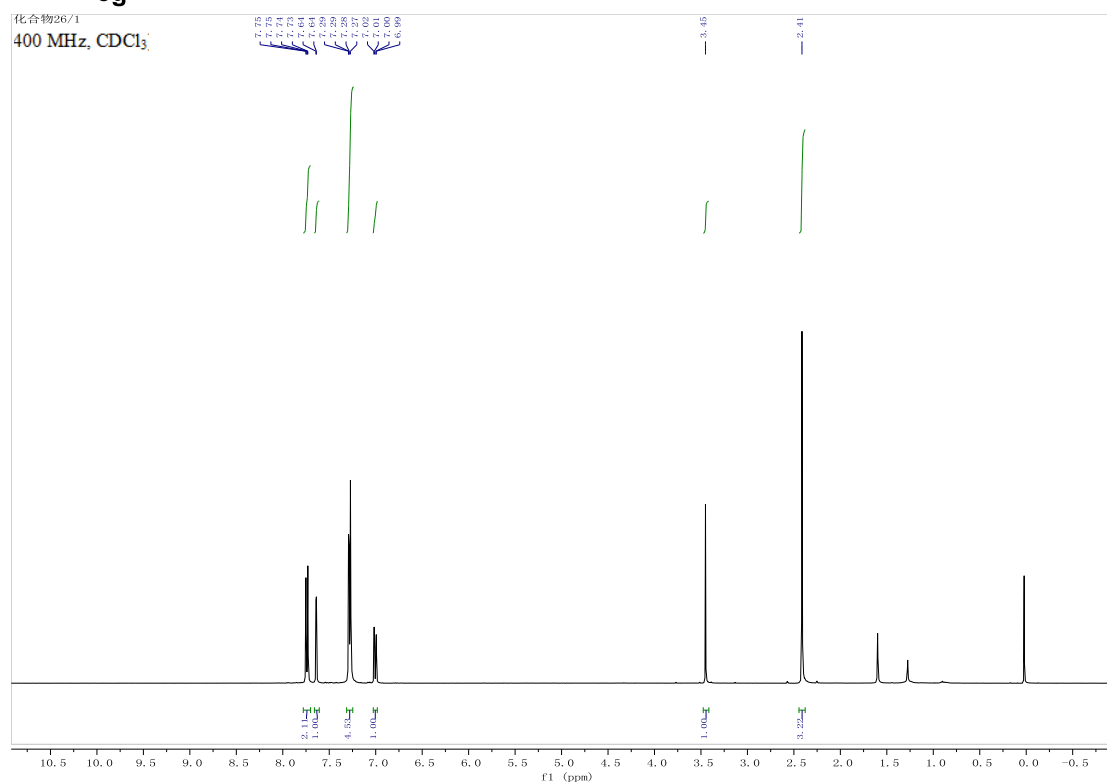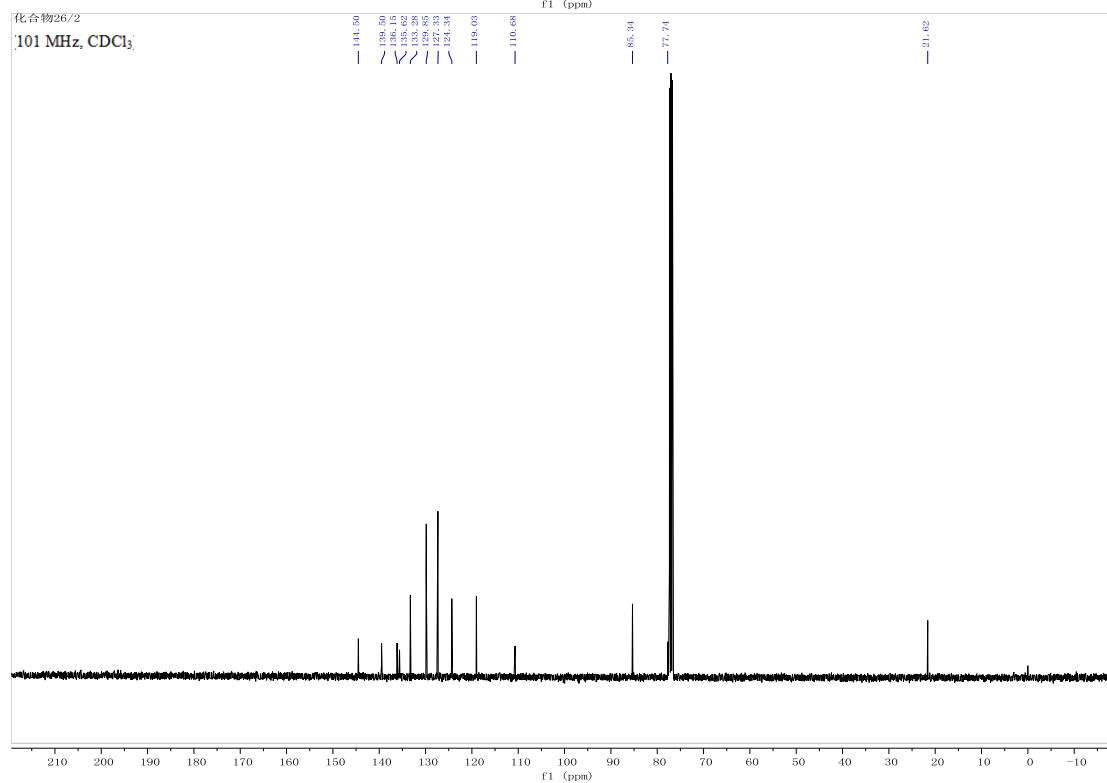



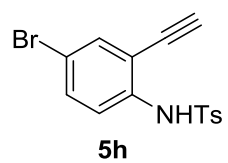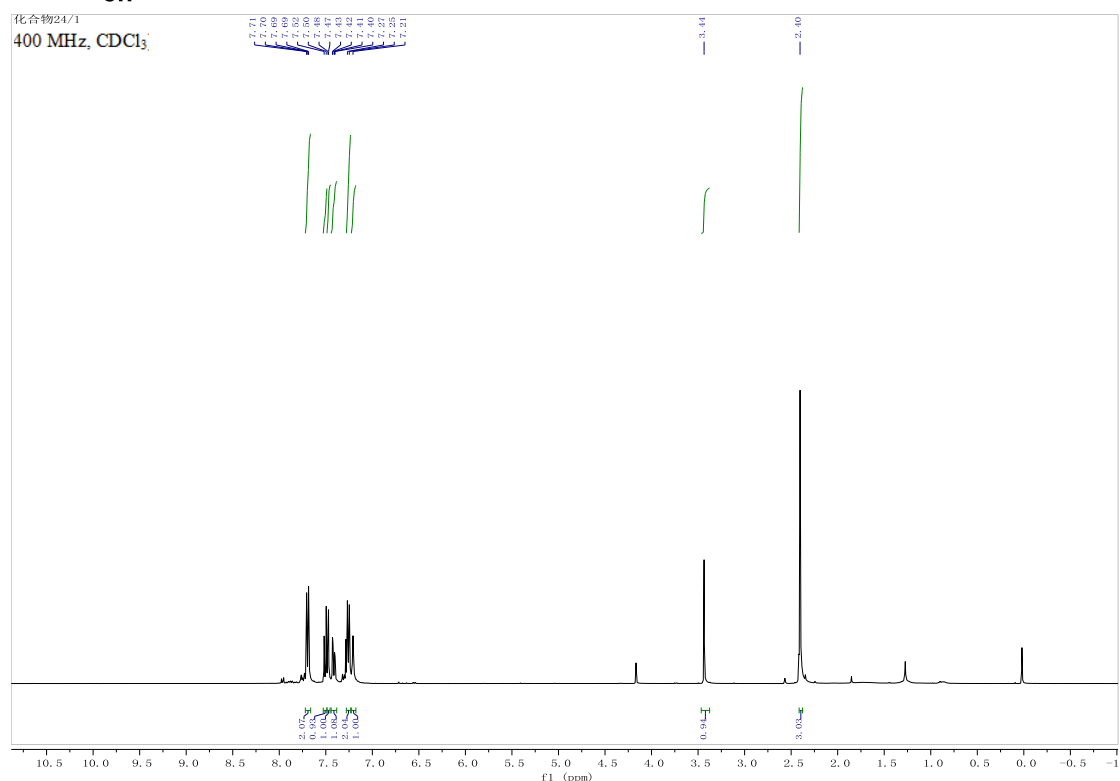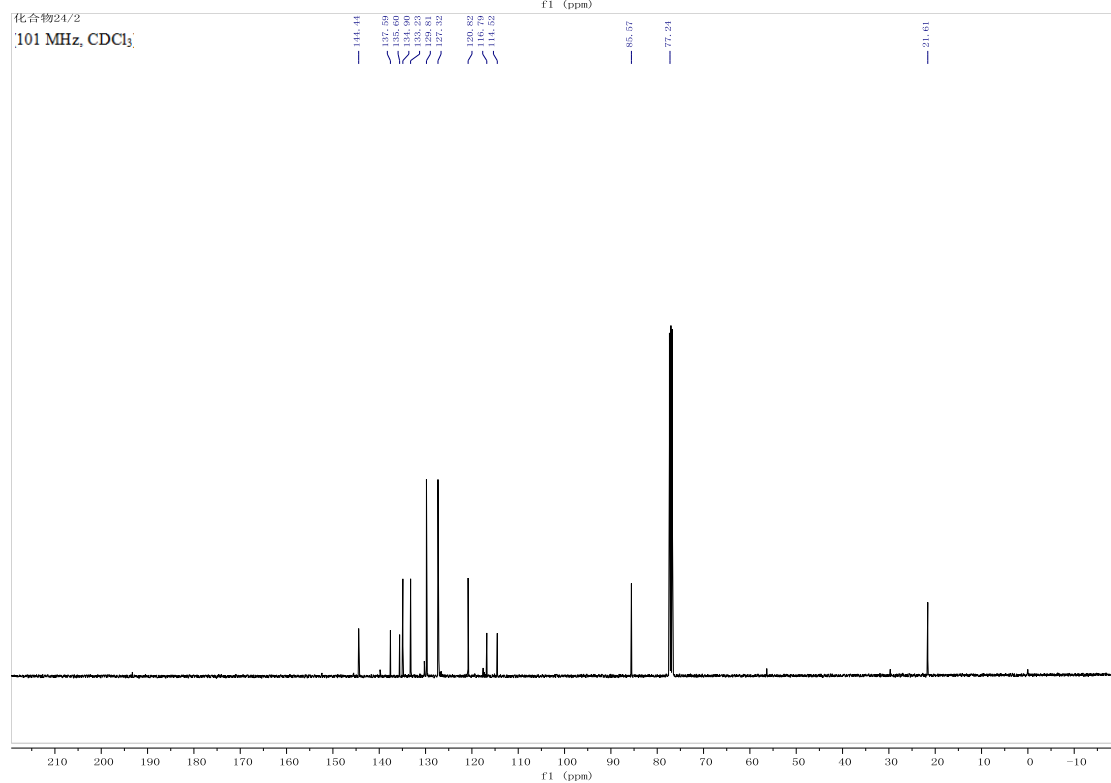

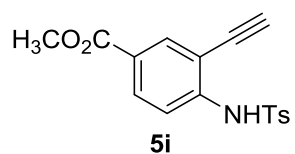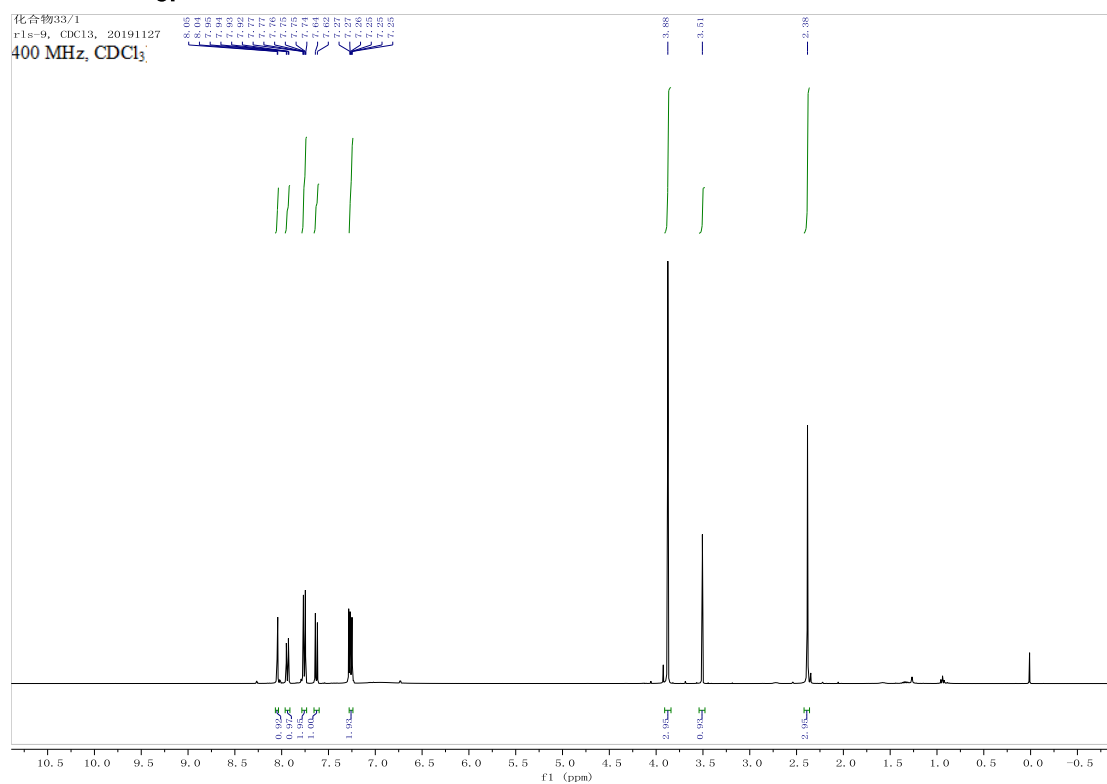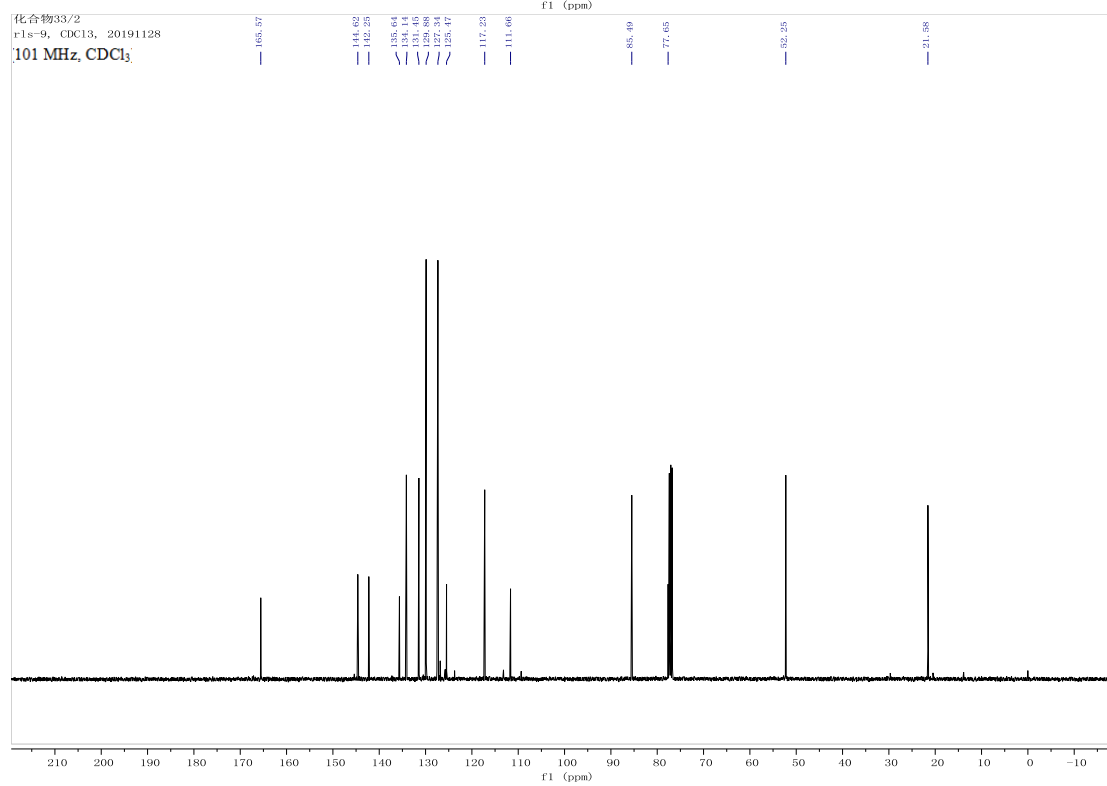

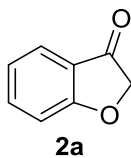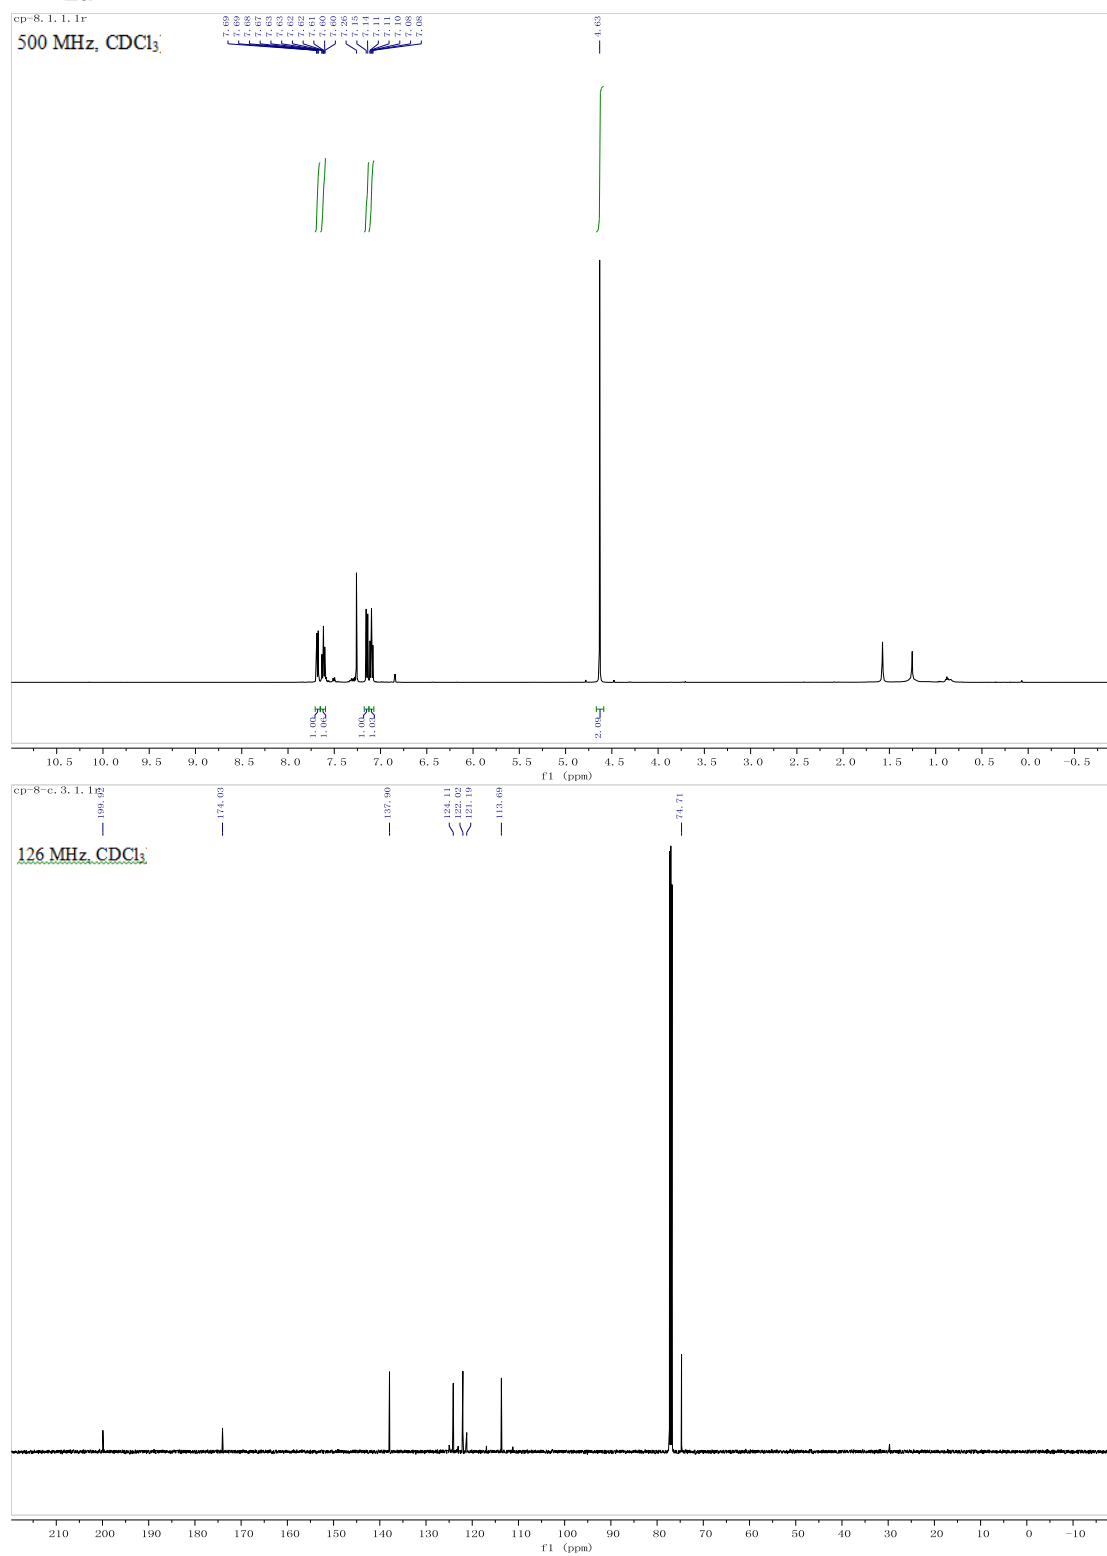

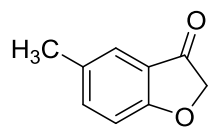

**2b**

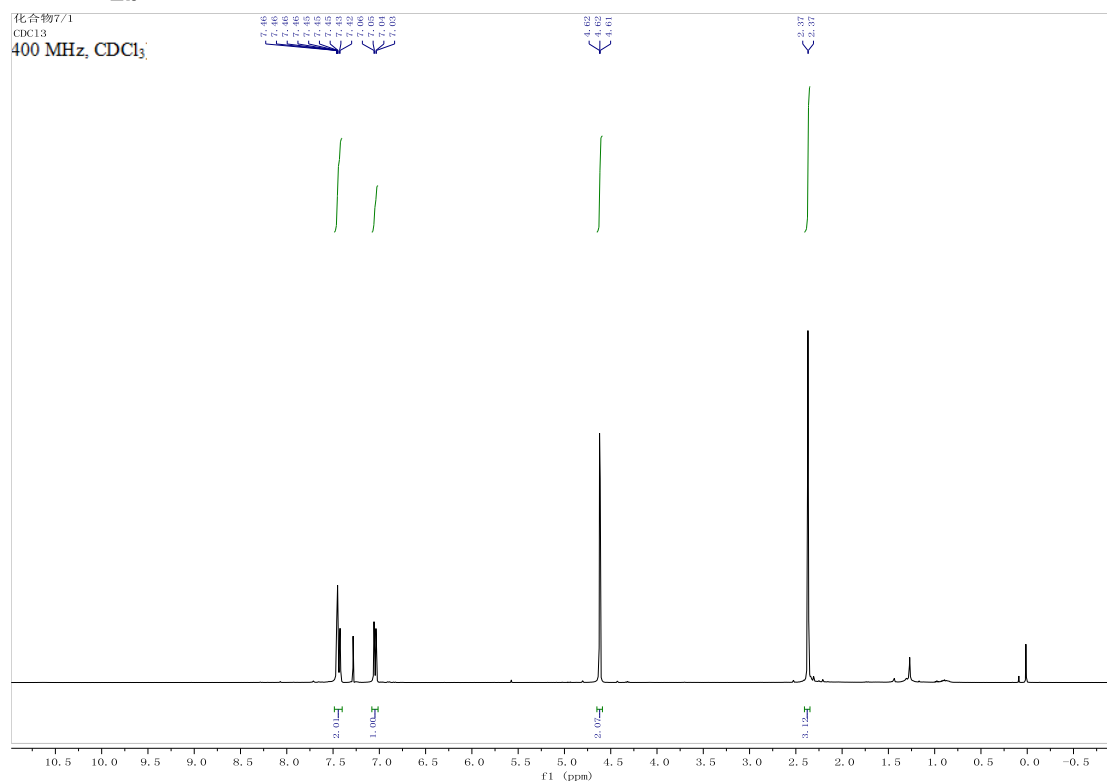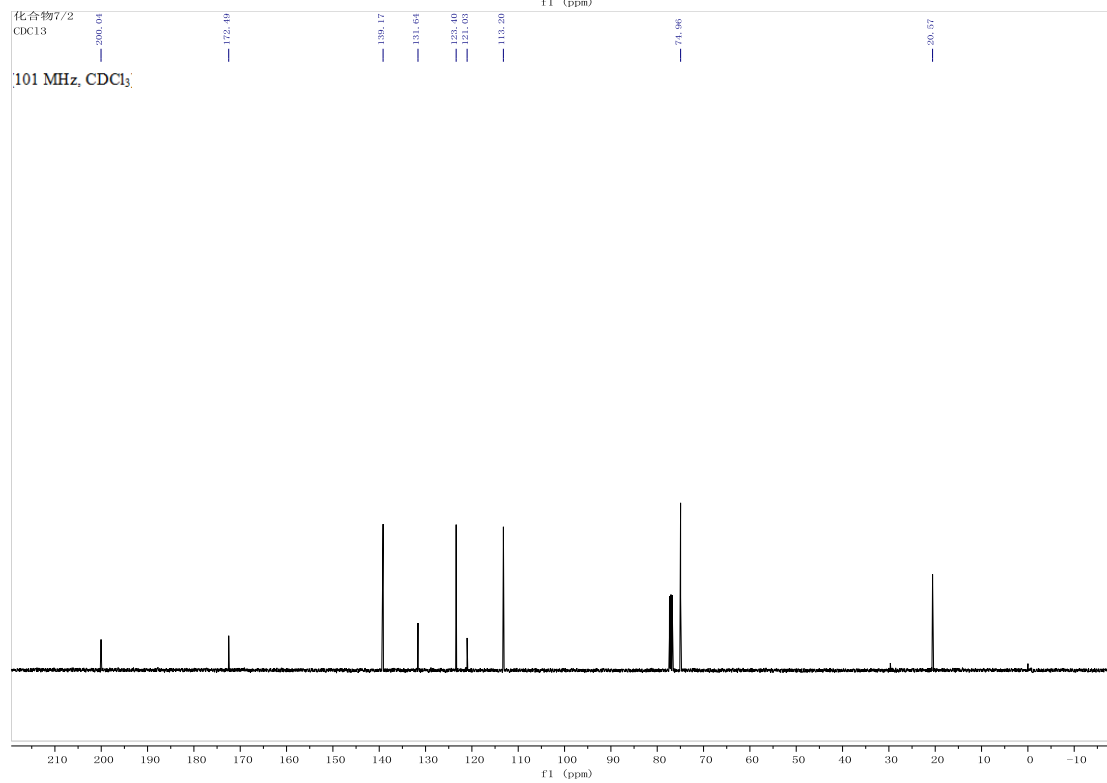

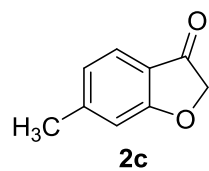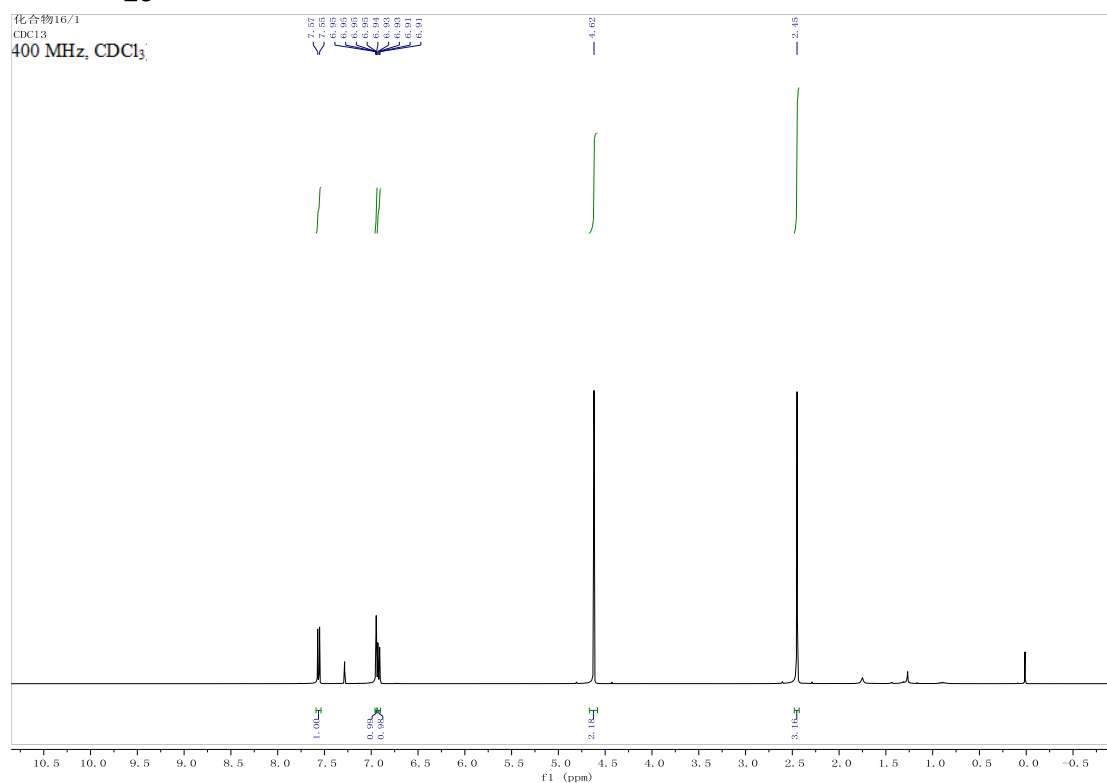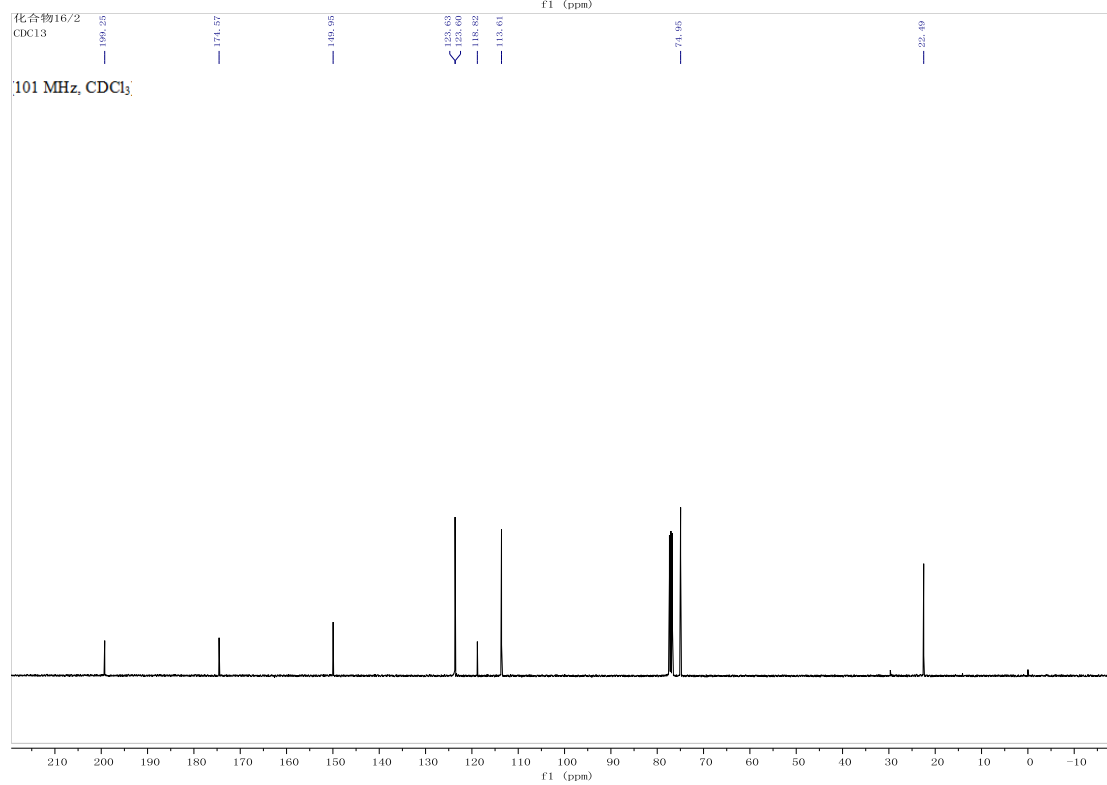

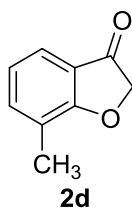

化合物22/1  
400 MHz, CDCl<sub>3</sub>

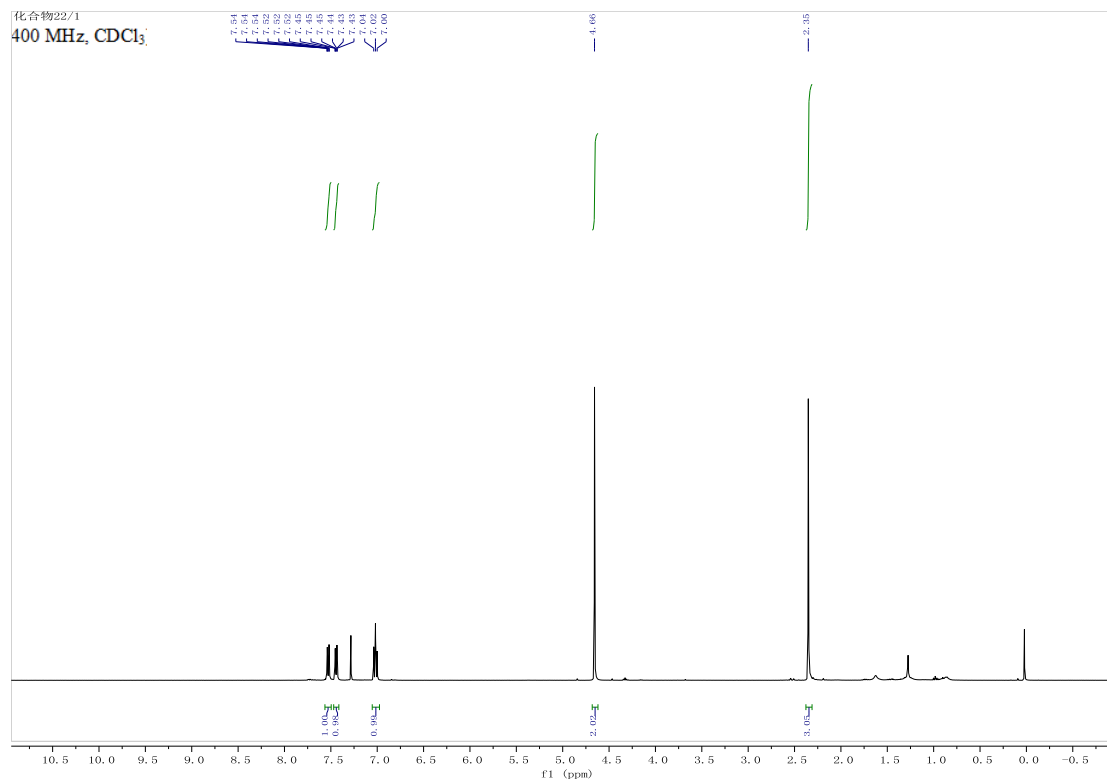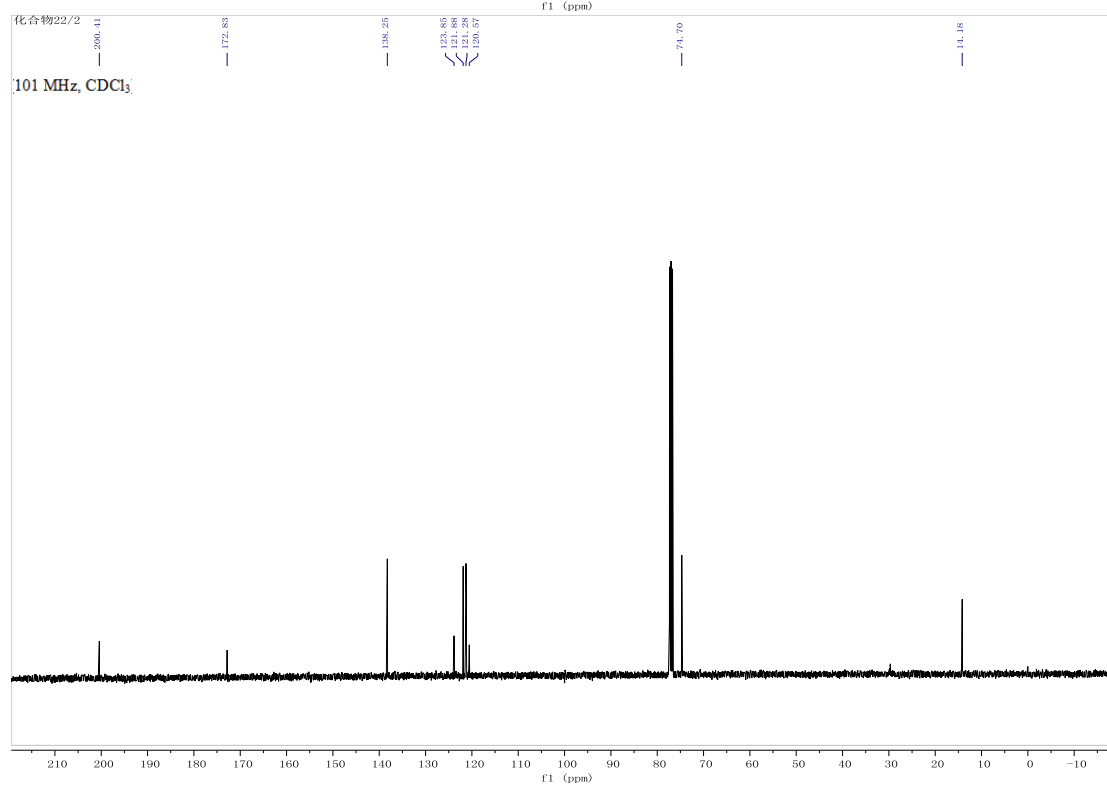

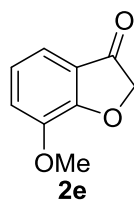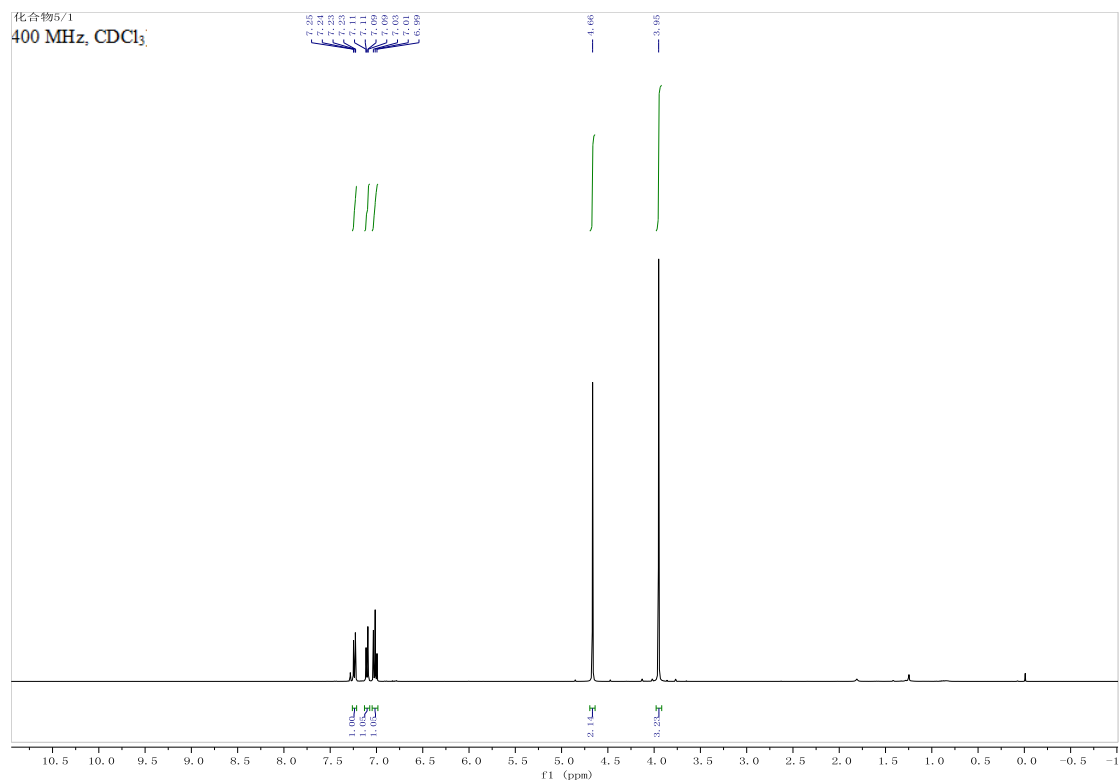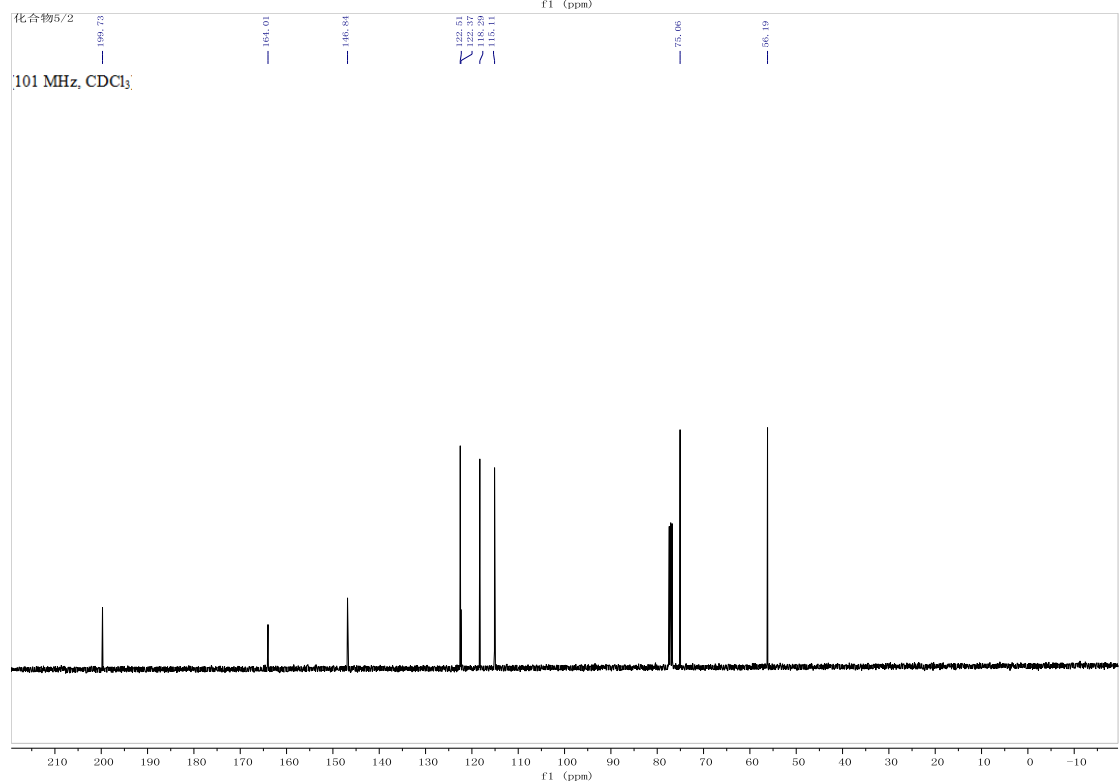

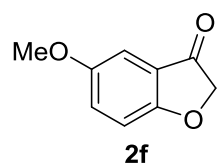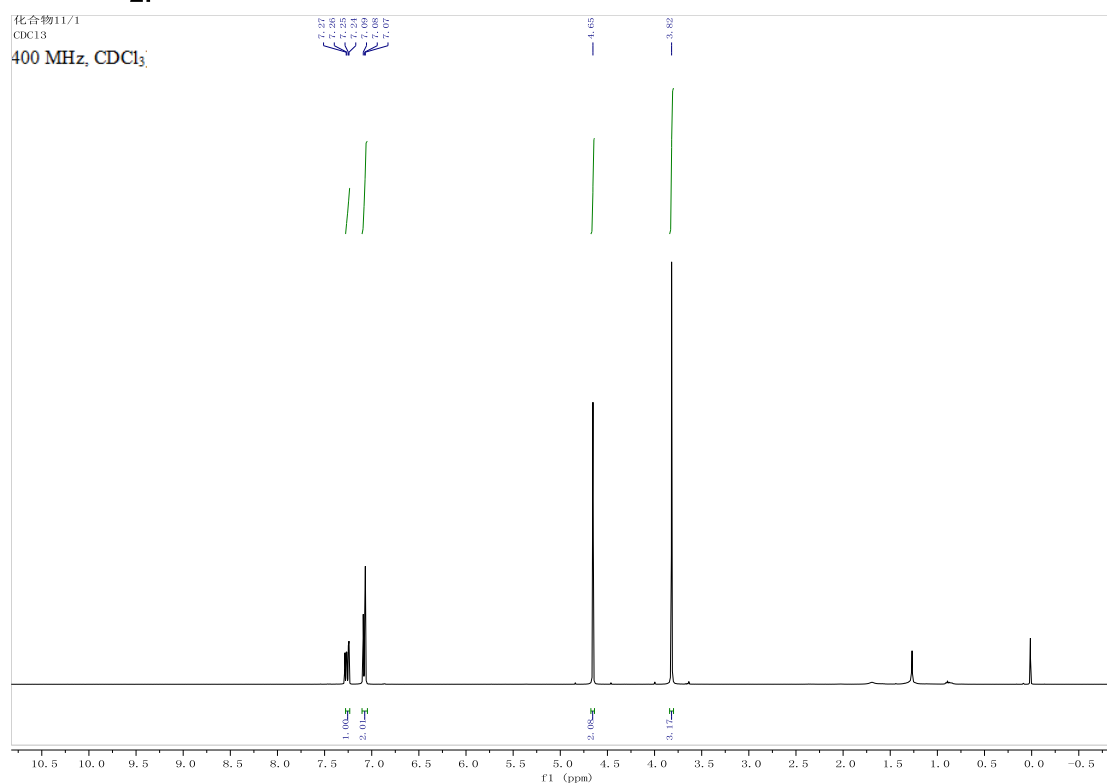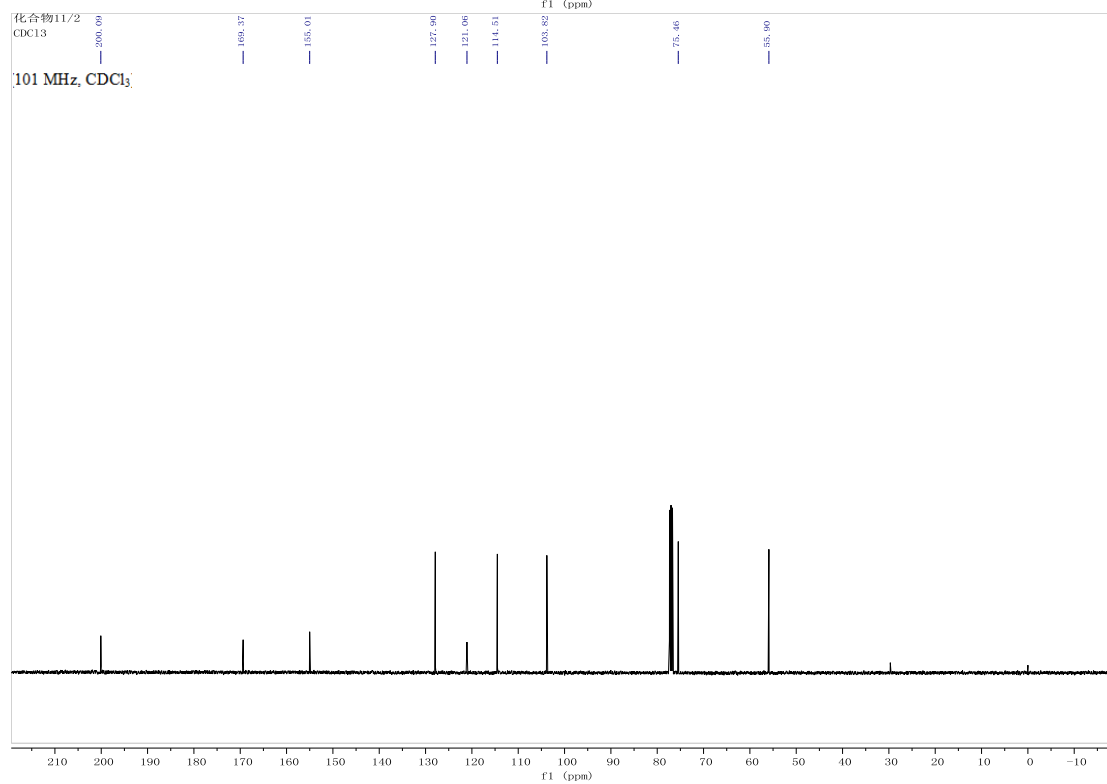



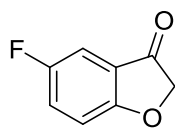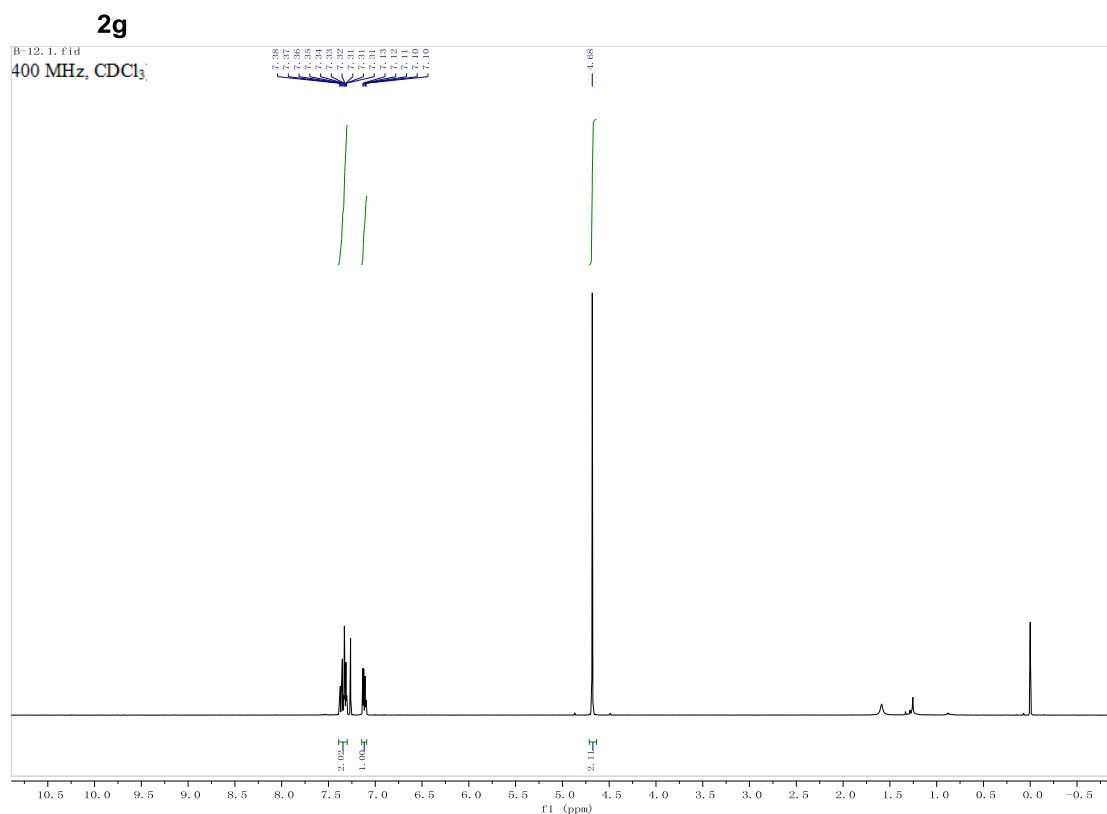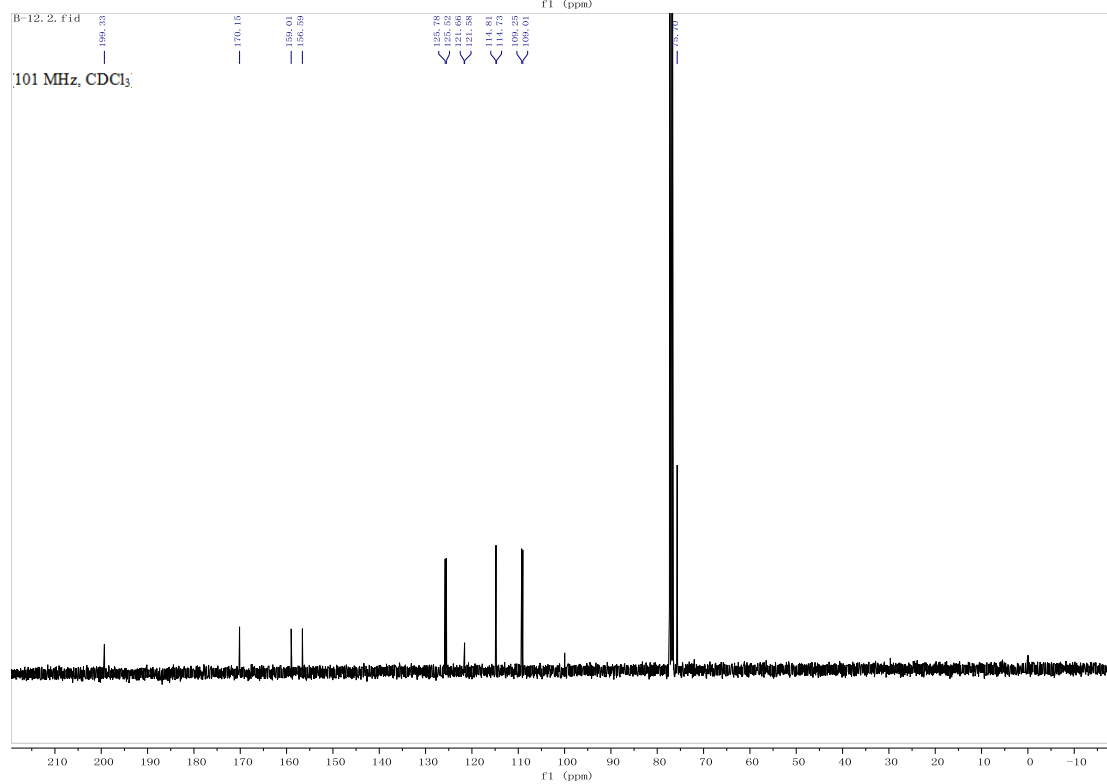

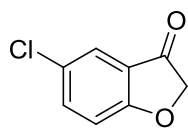

**2h**

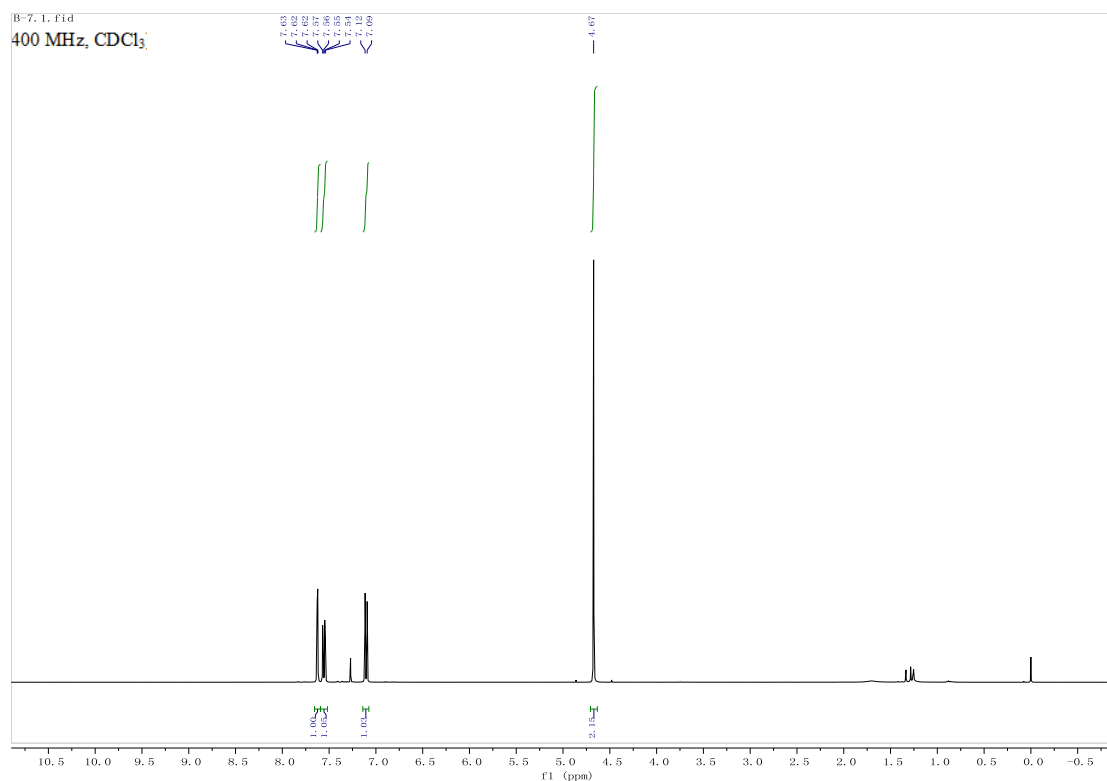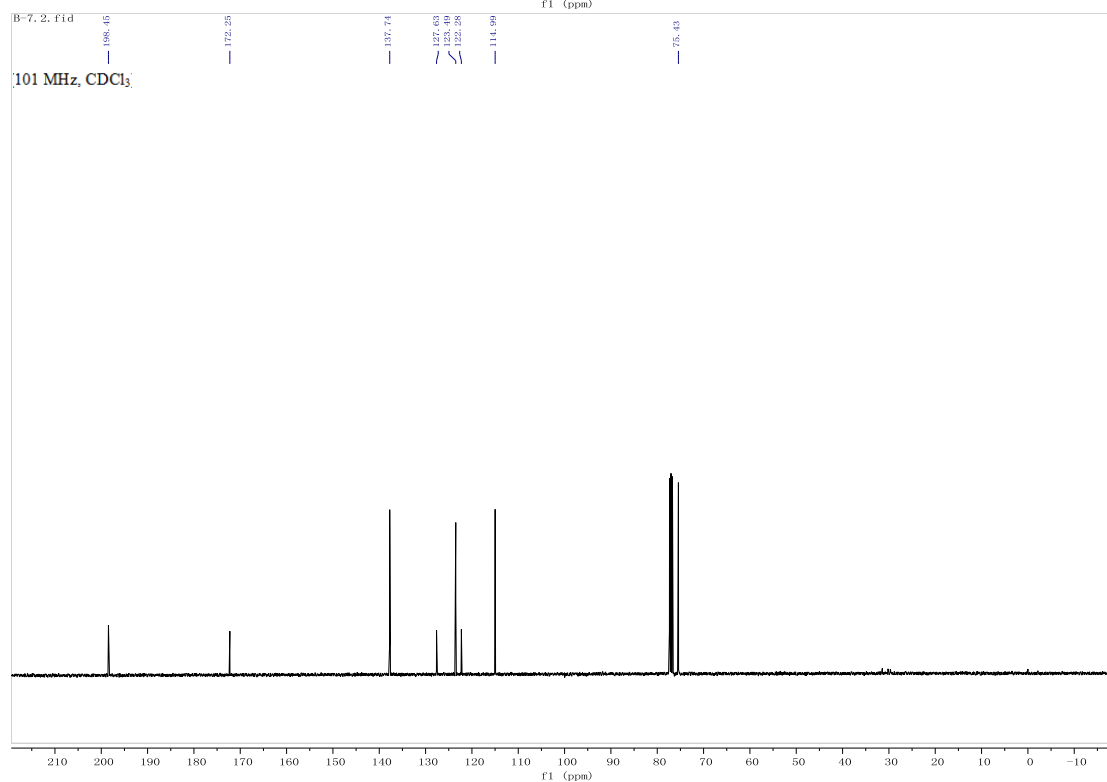

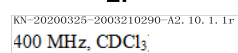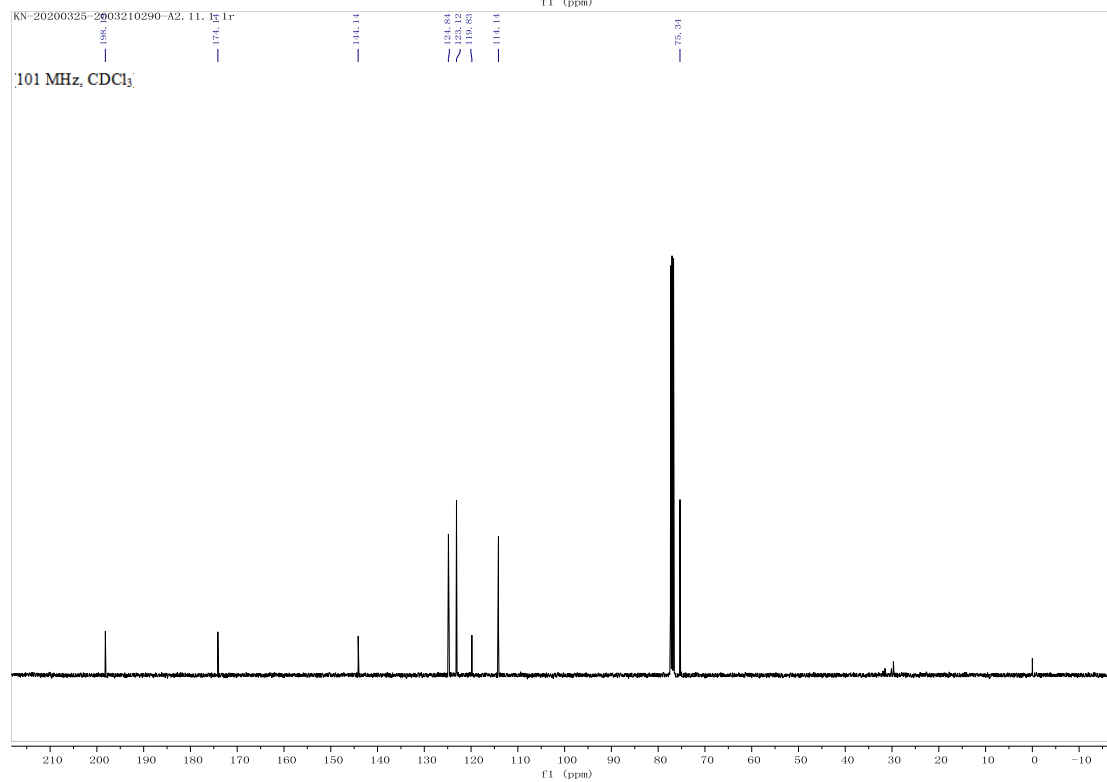

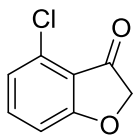

2j

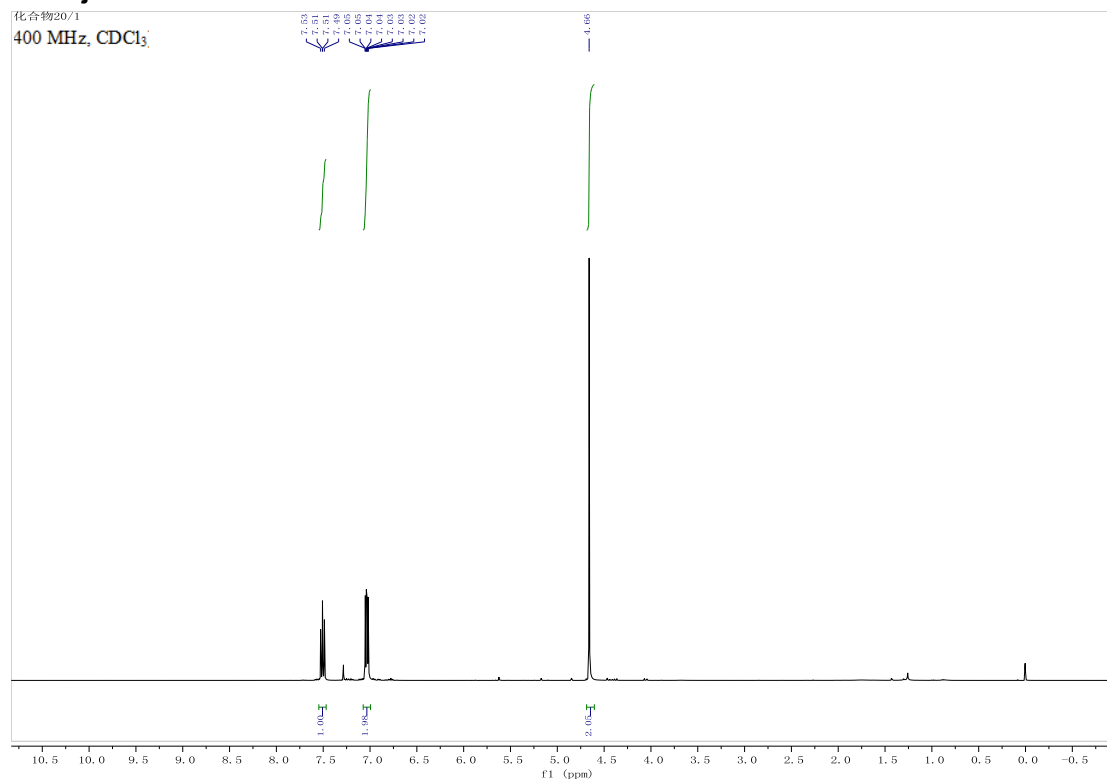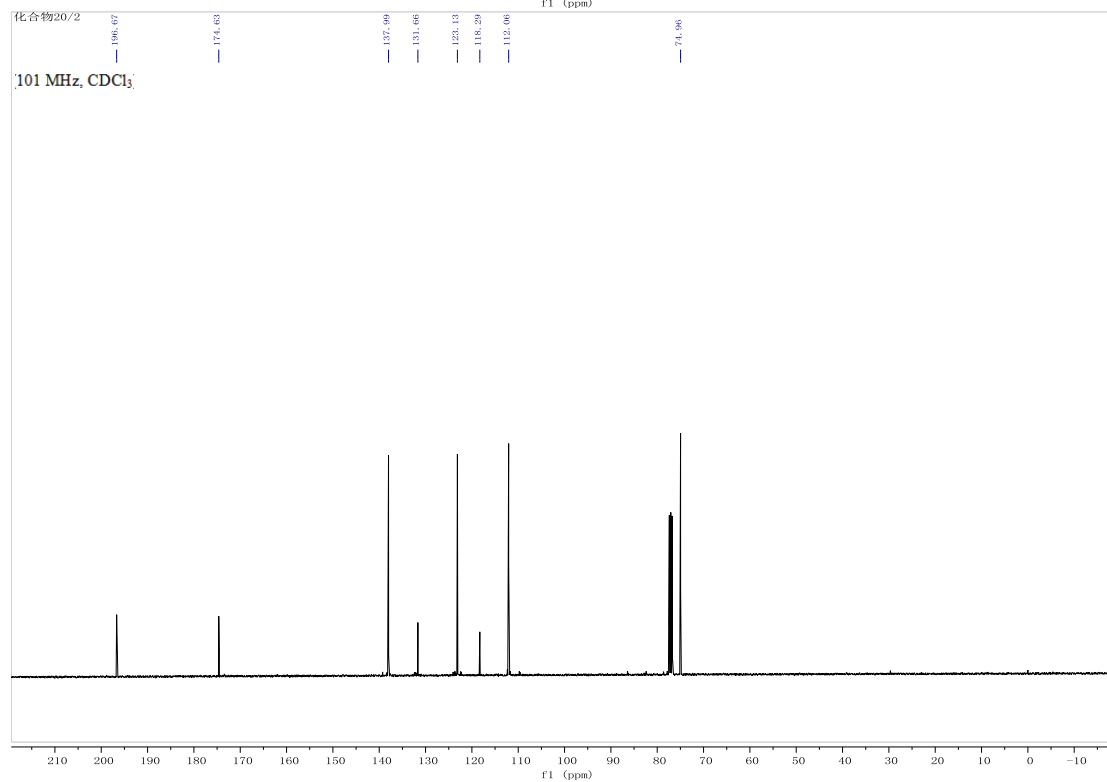

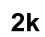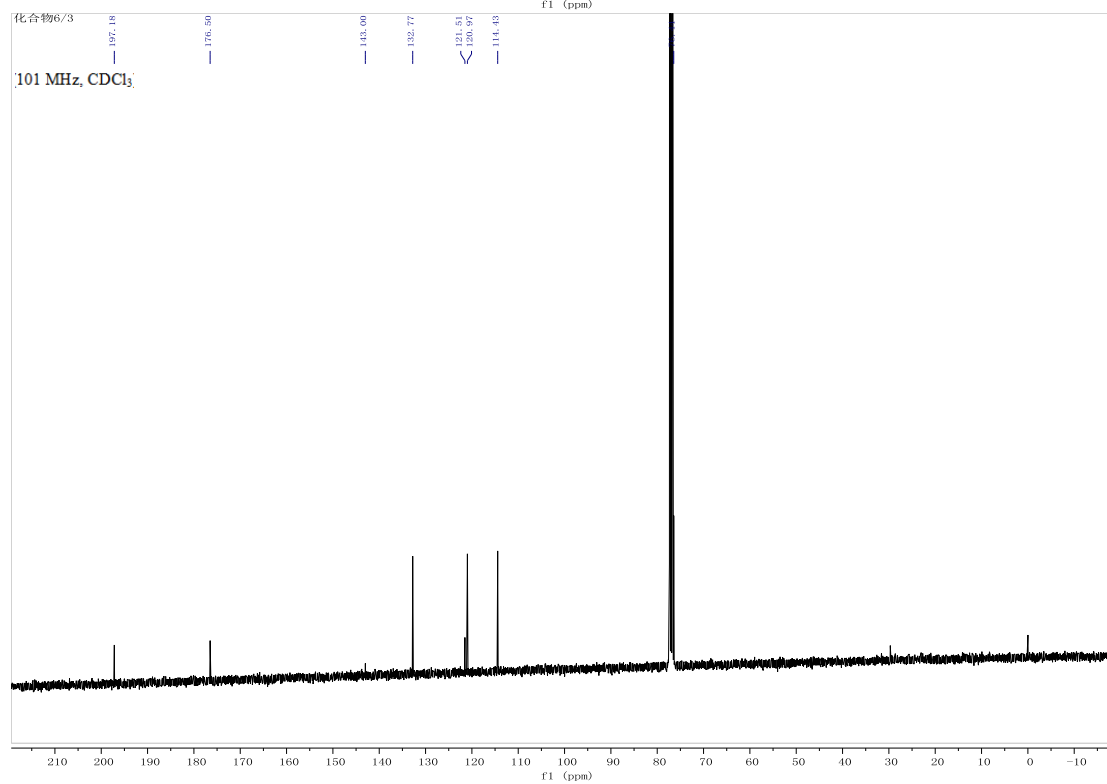

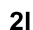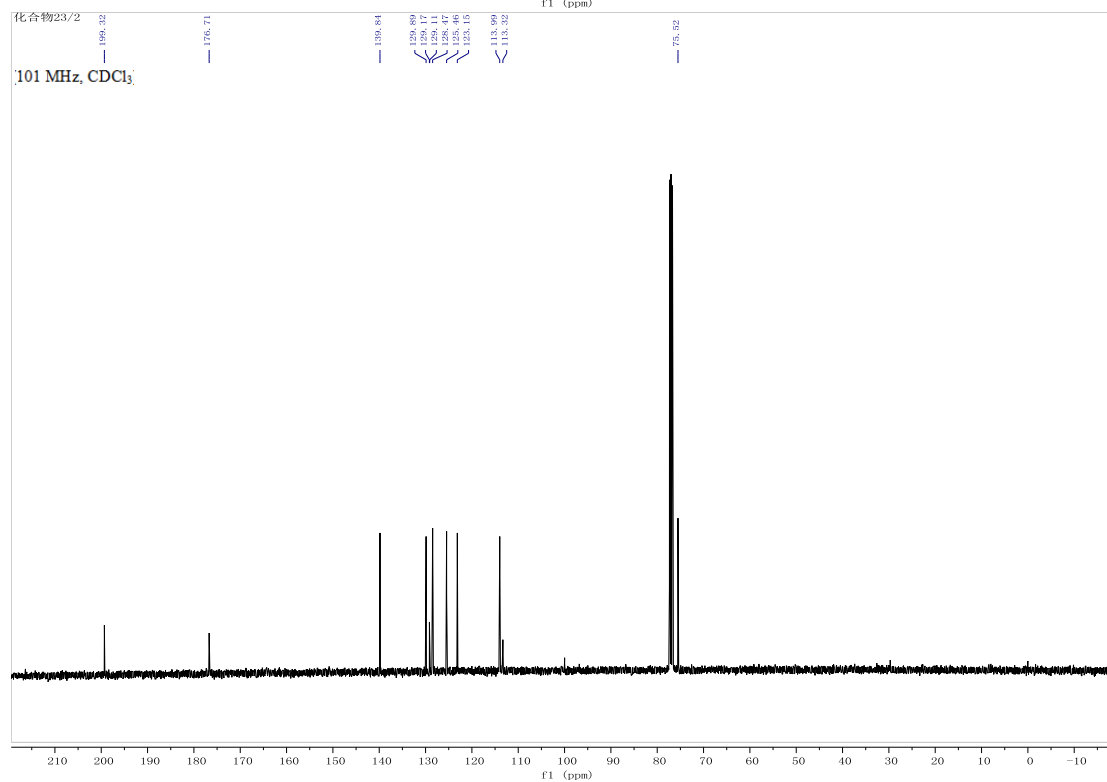

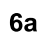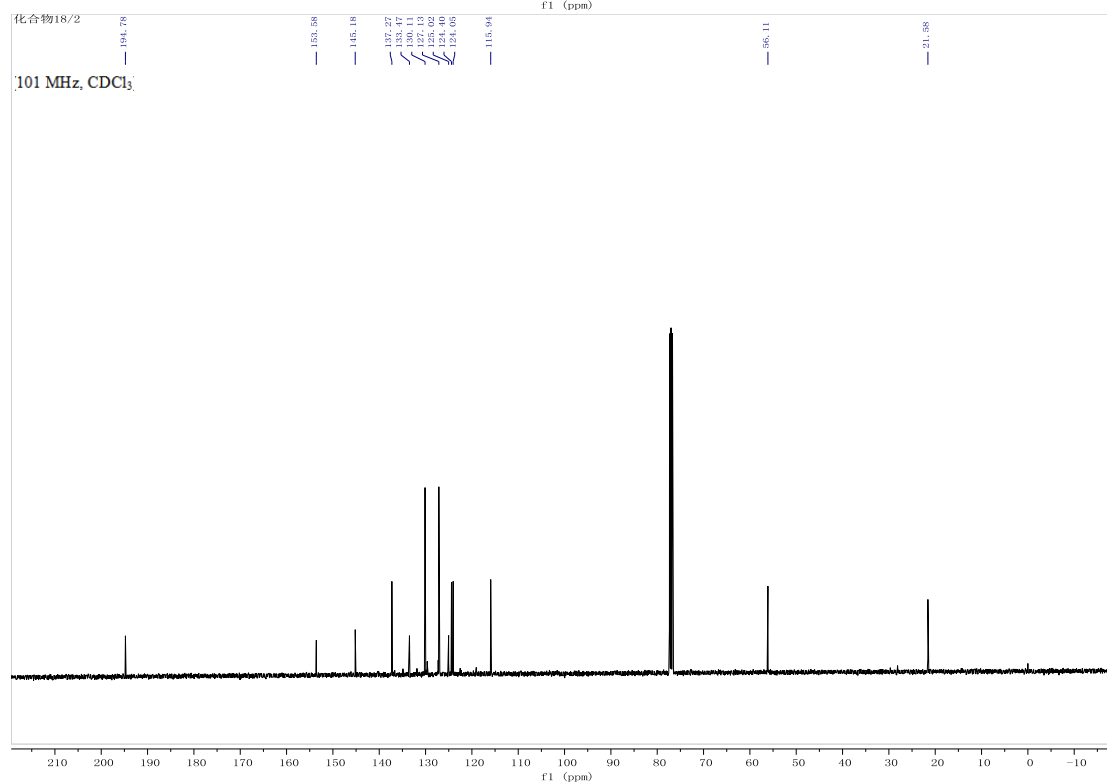

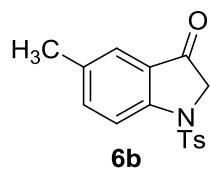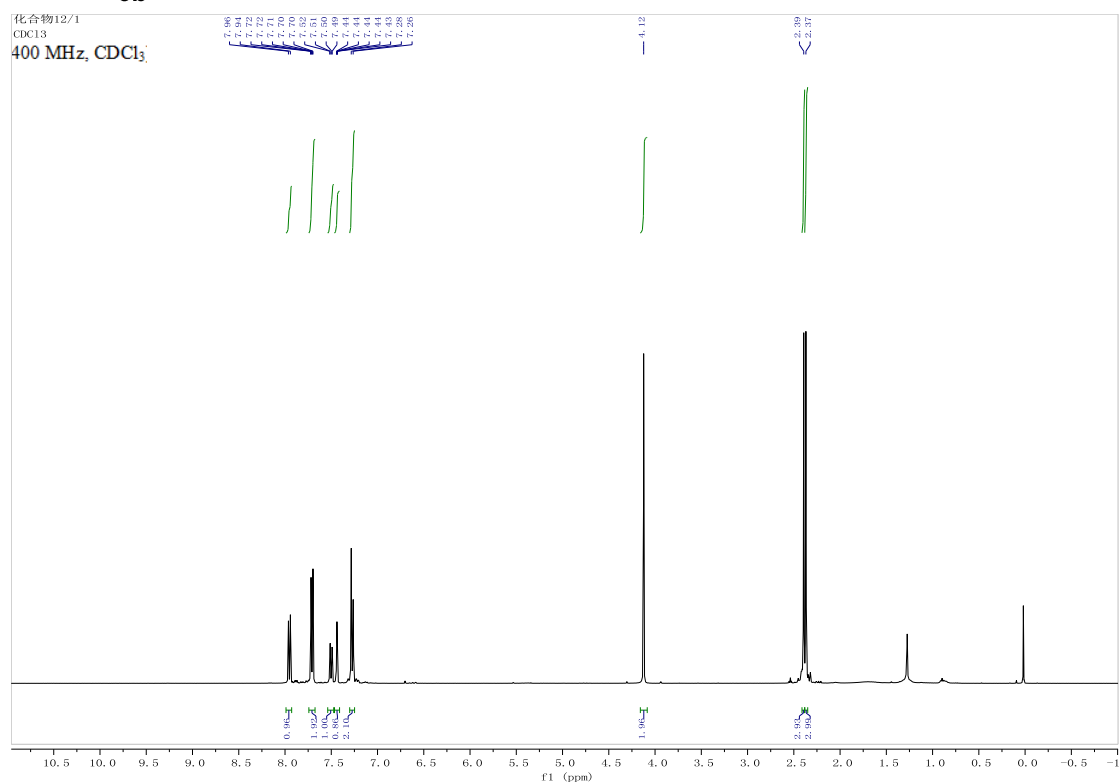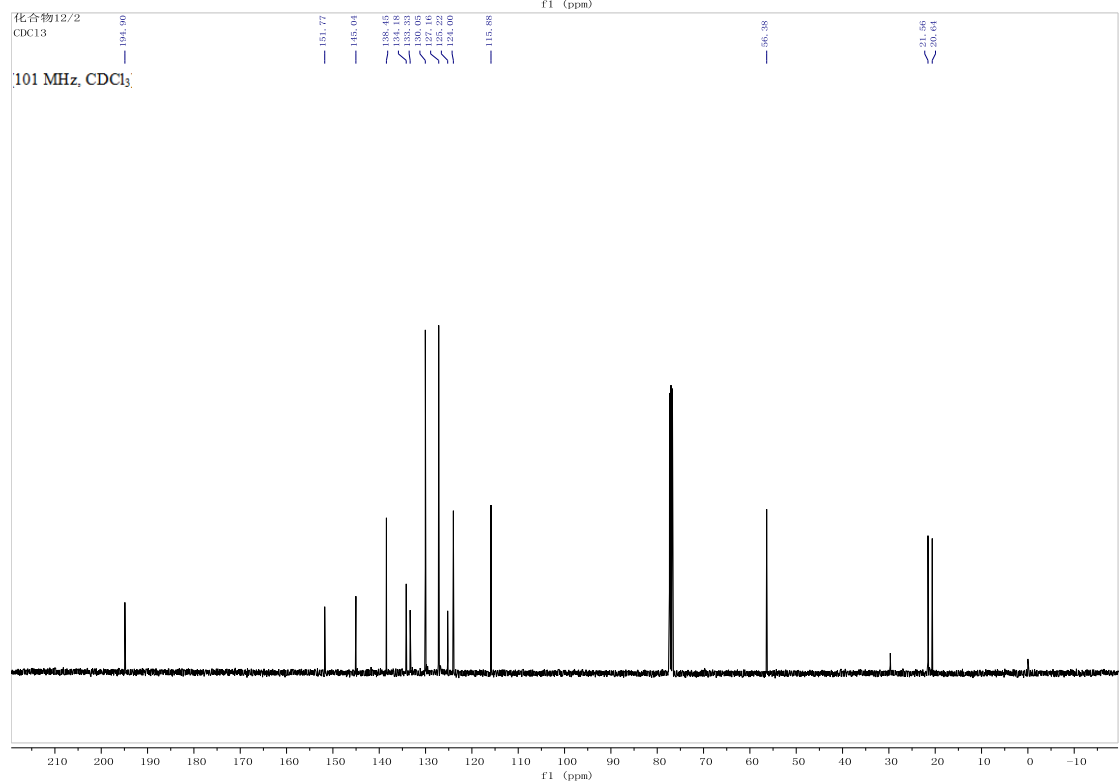



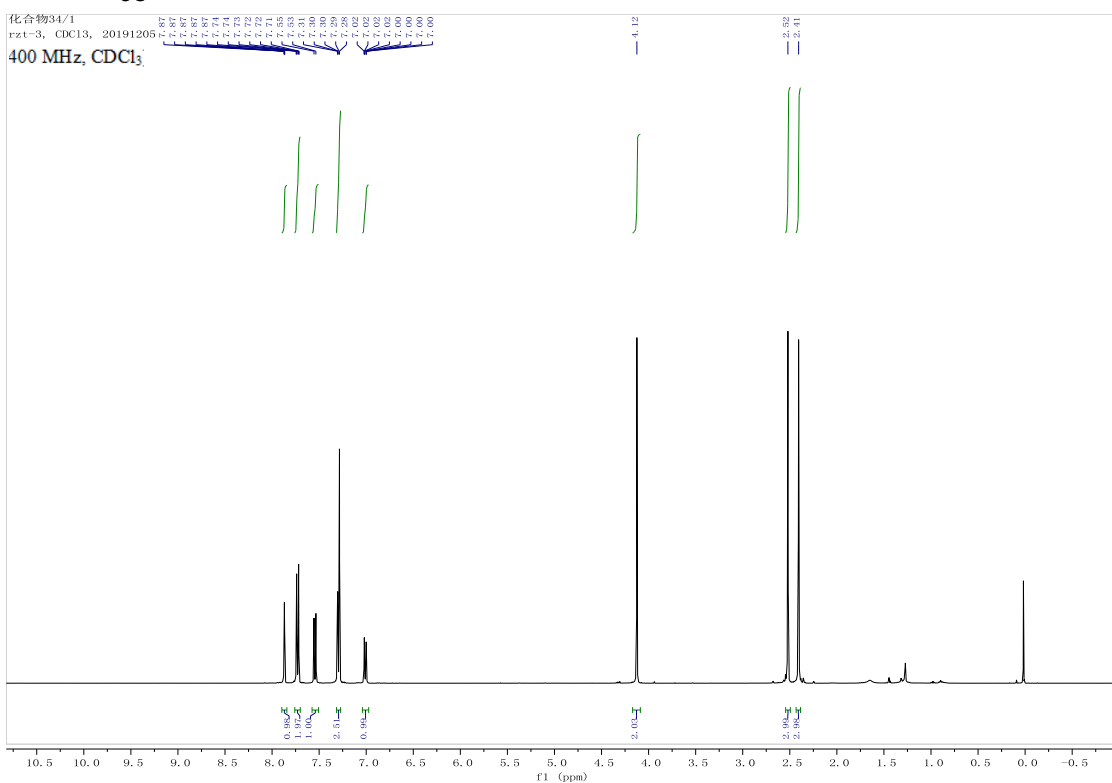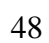

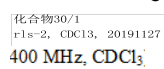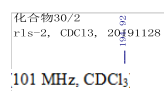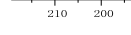

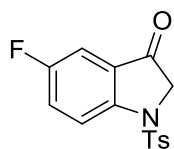

**6e**

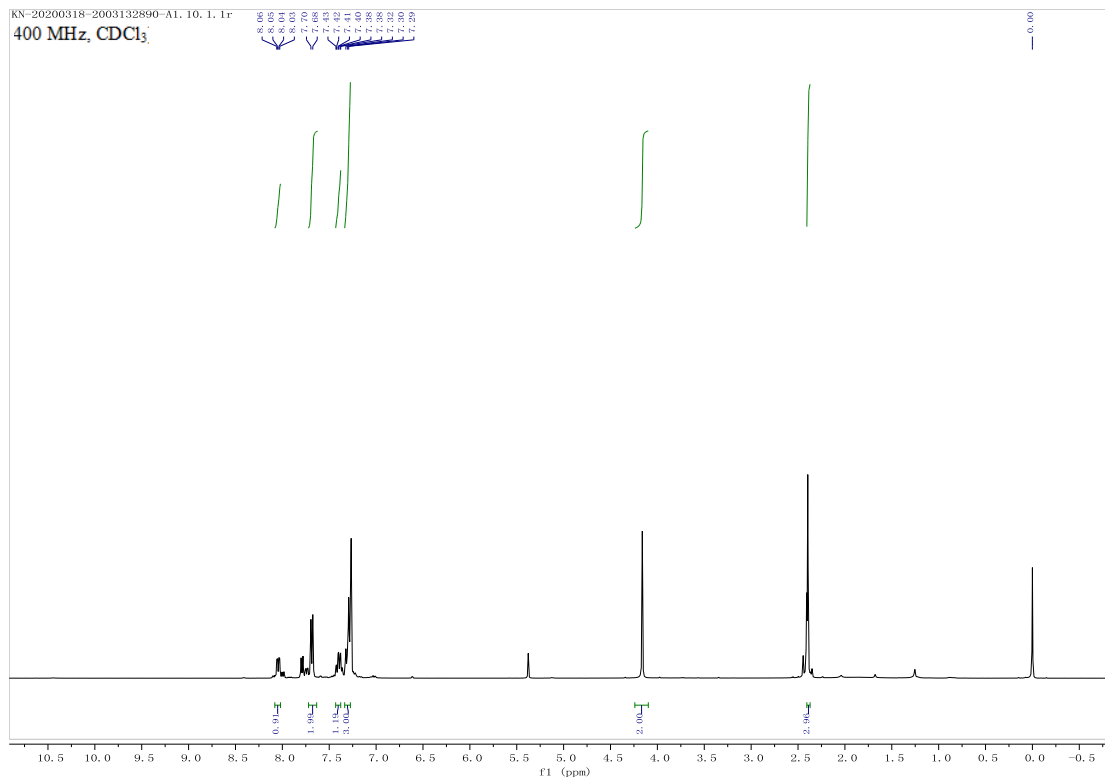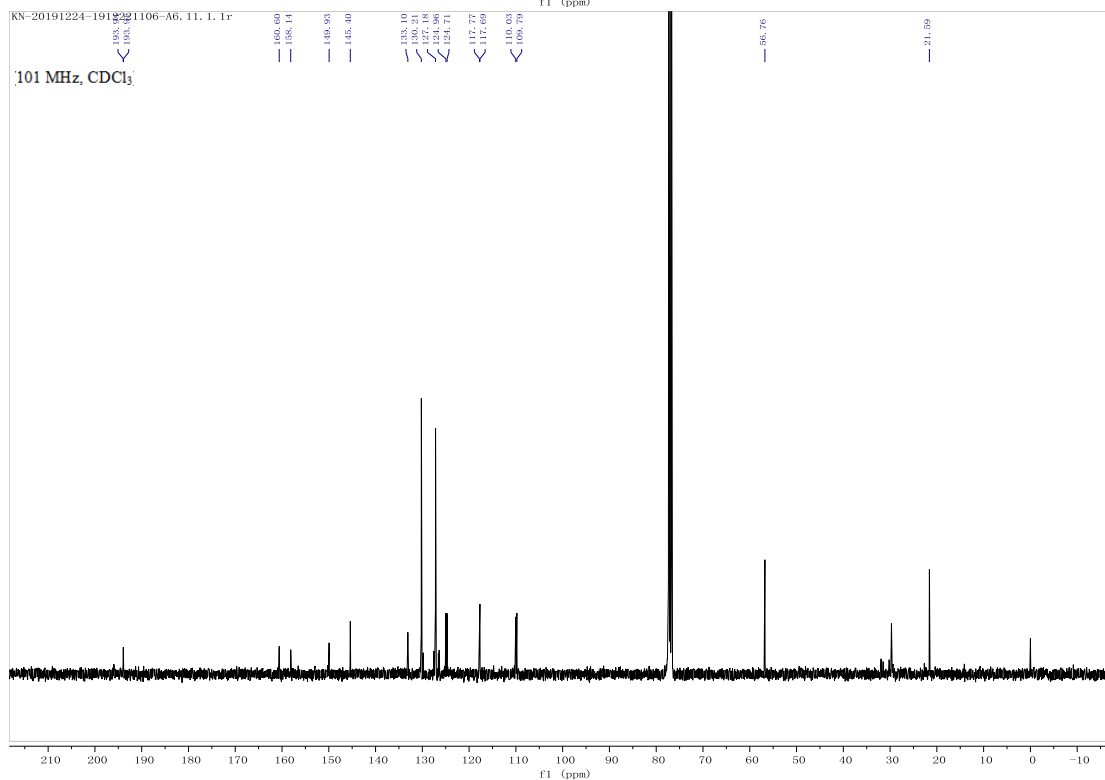

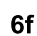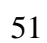

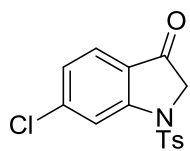

**6g**

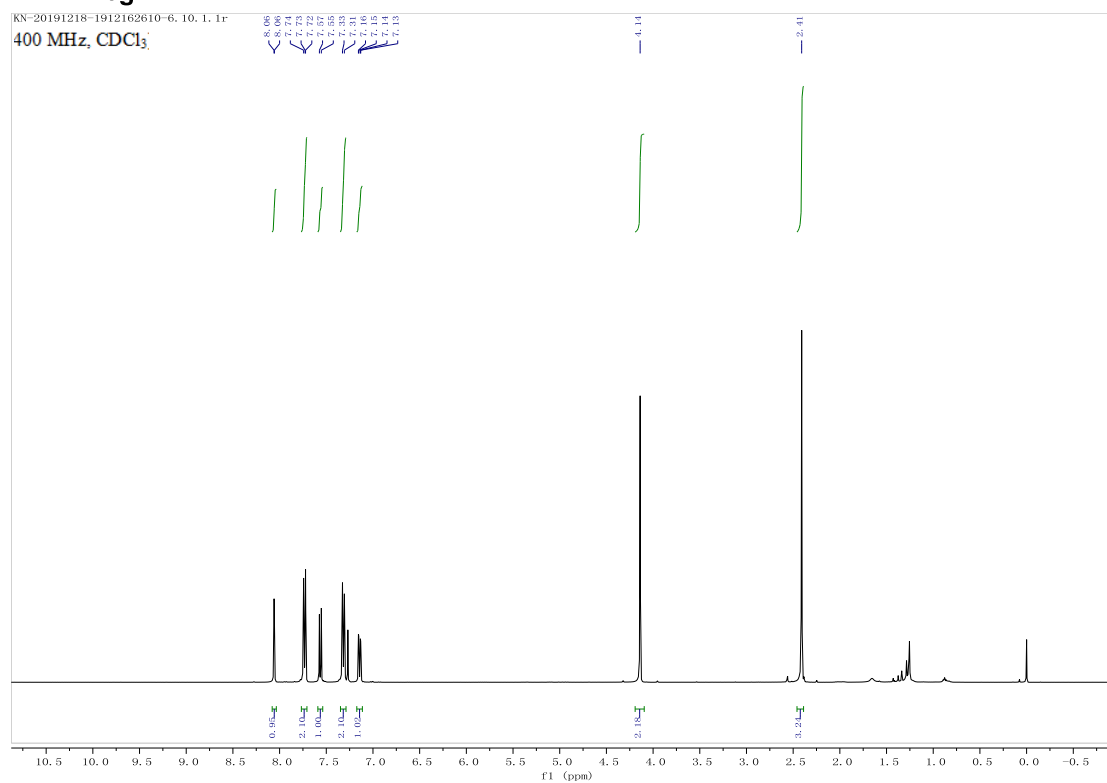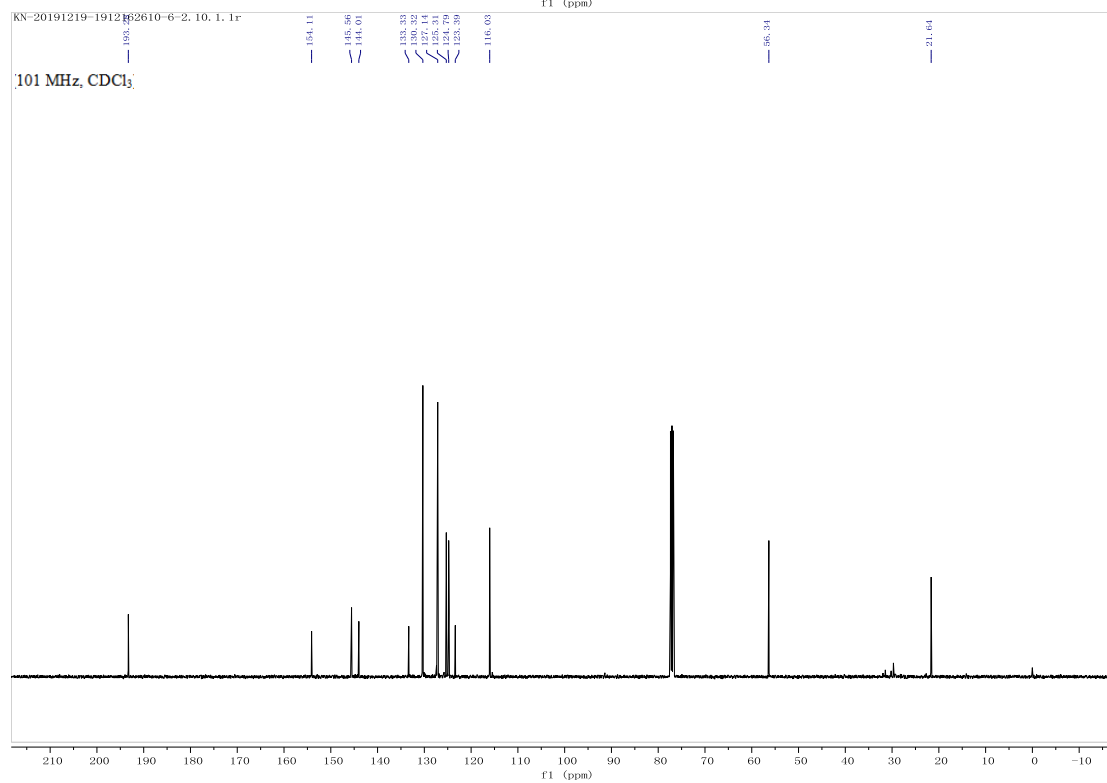

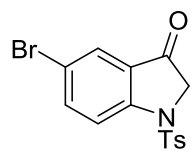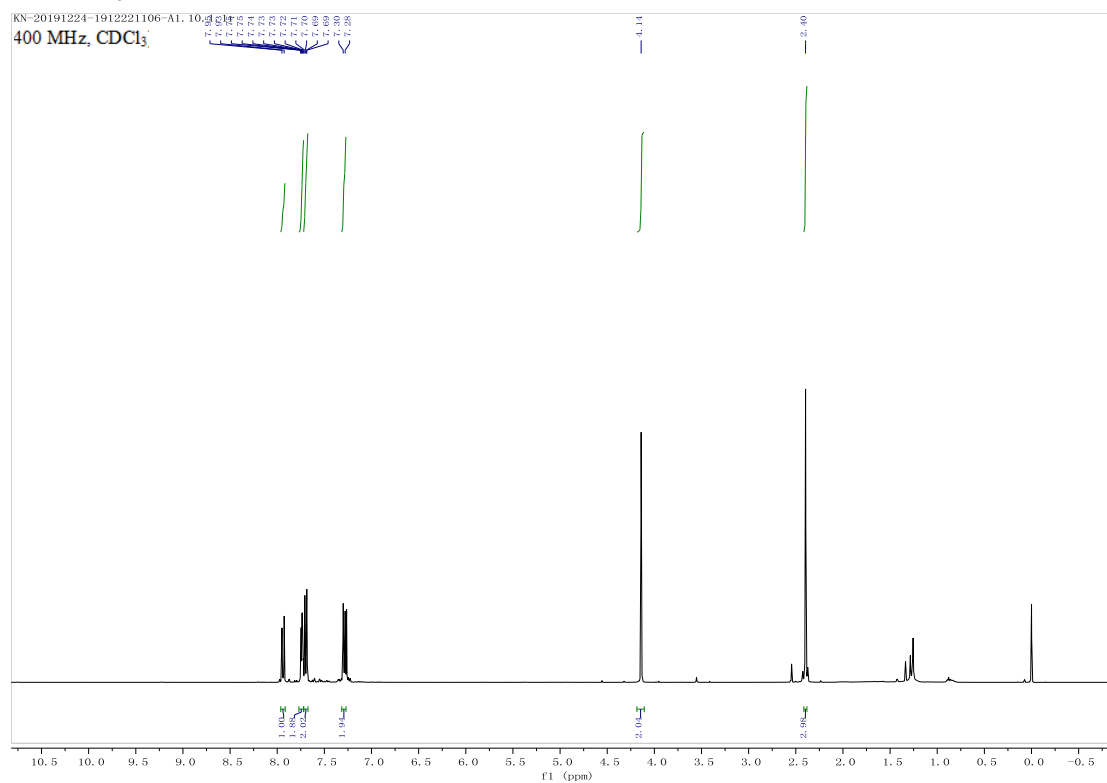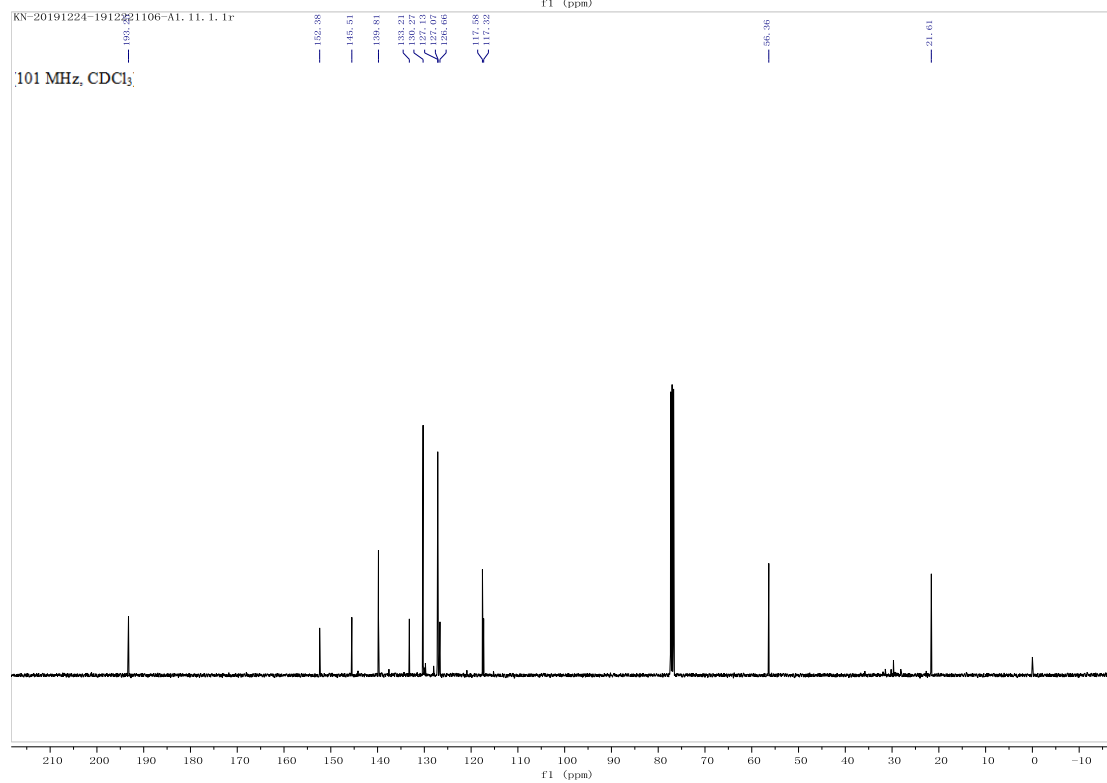

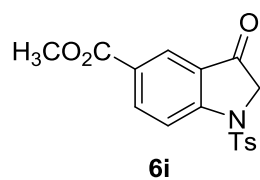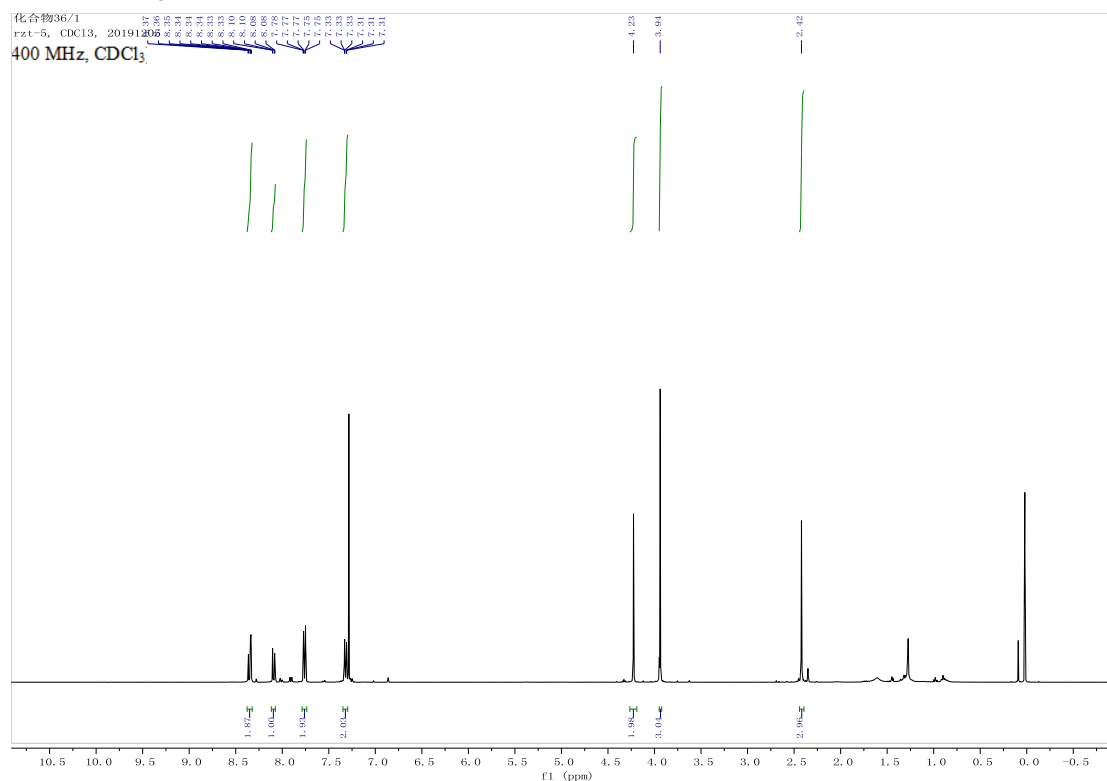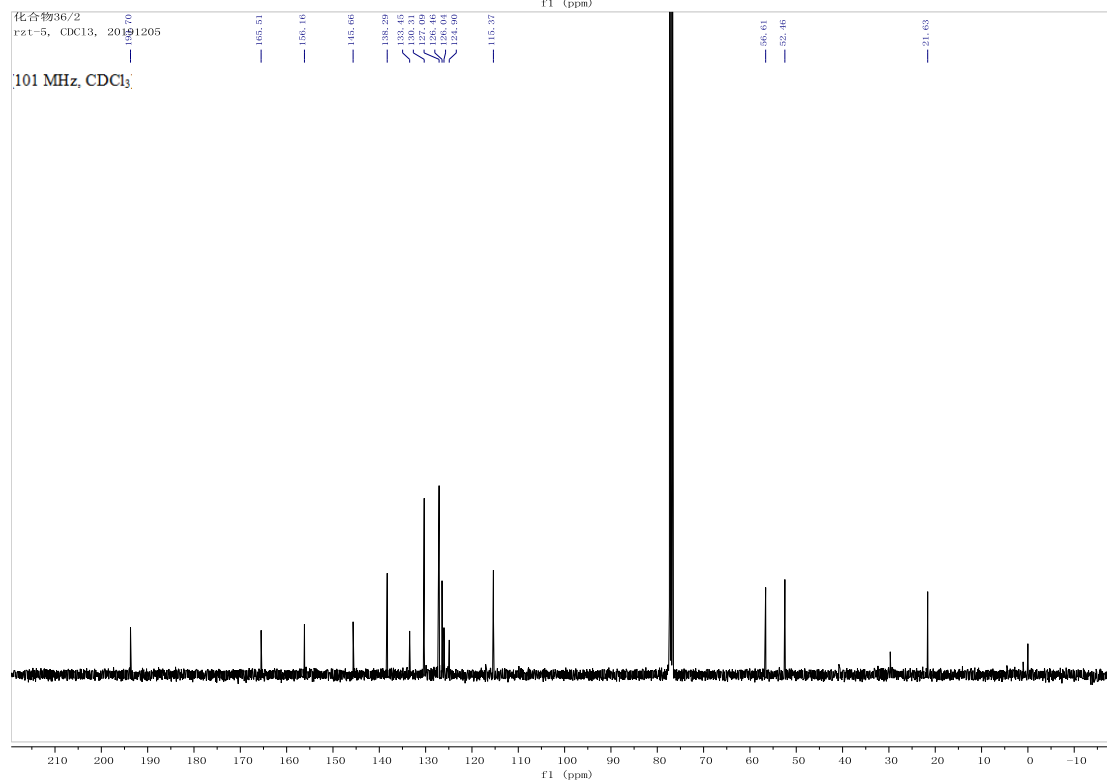

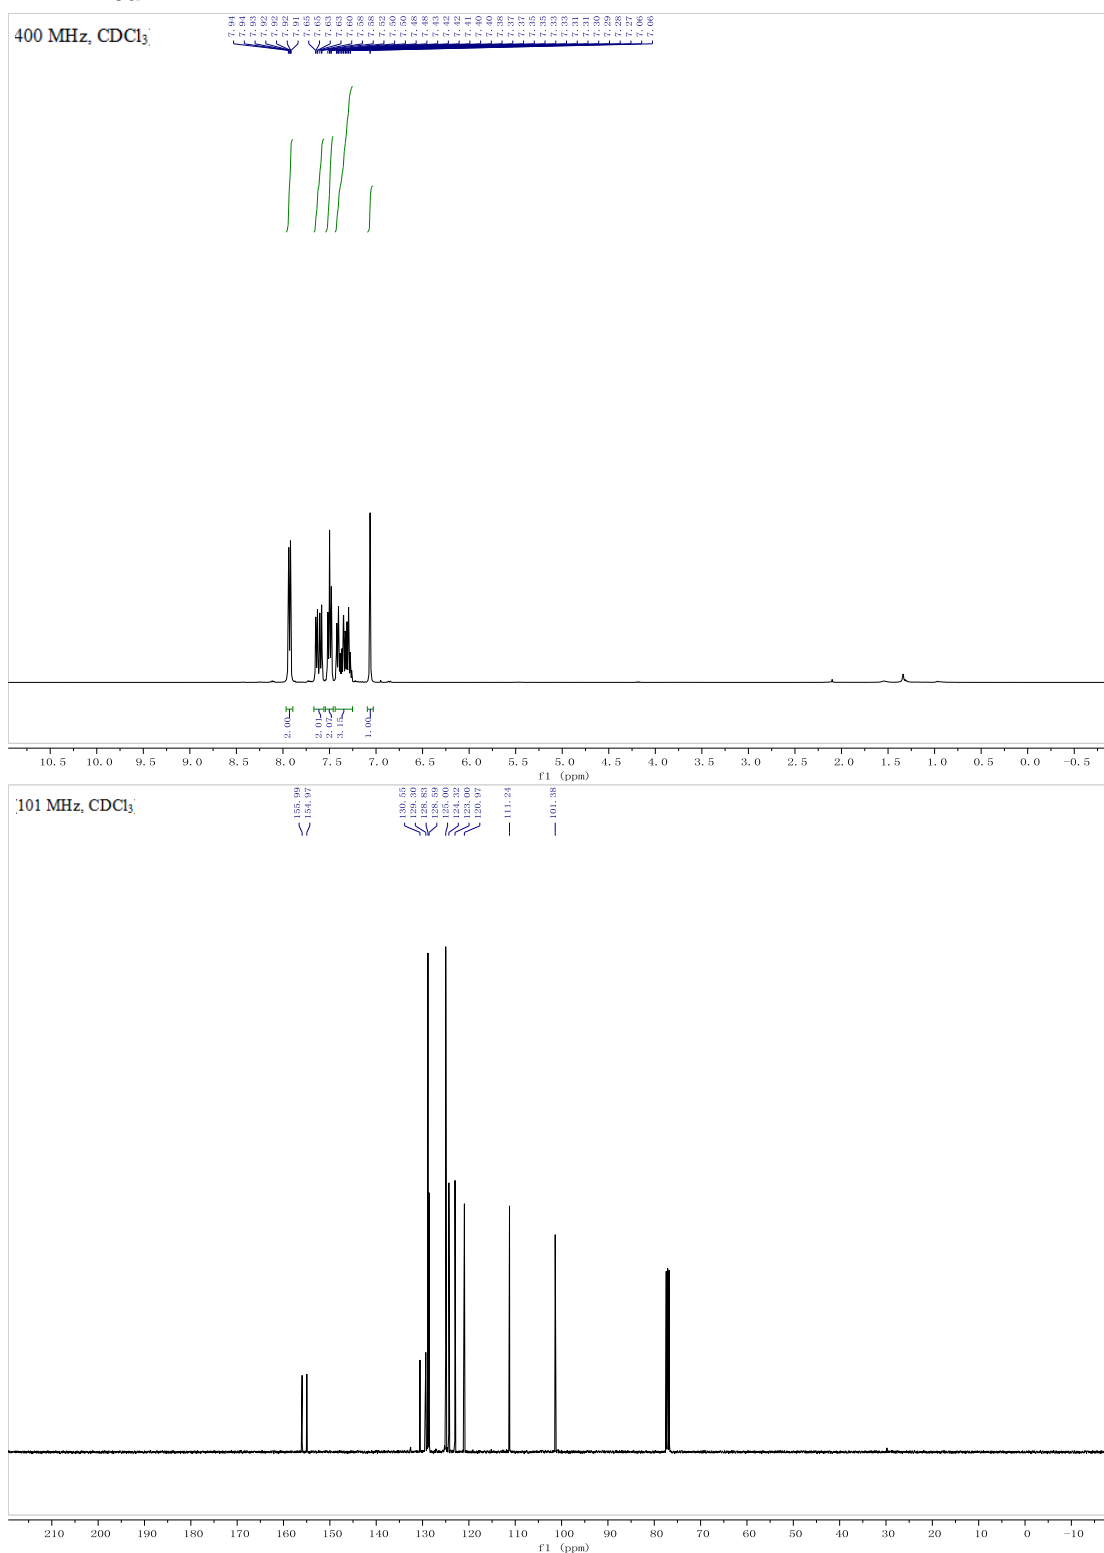



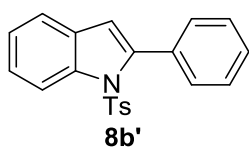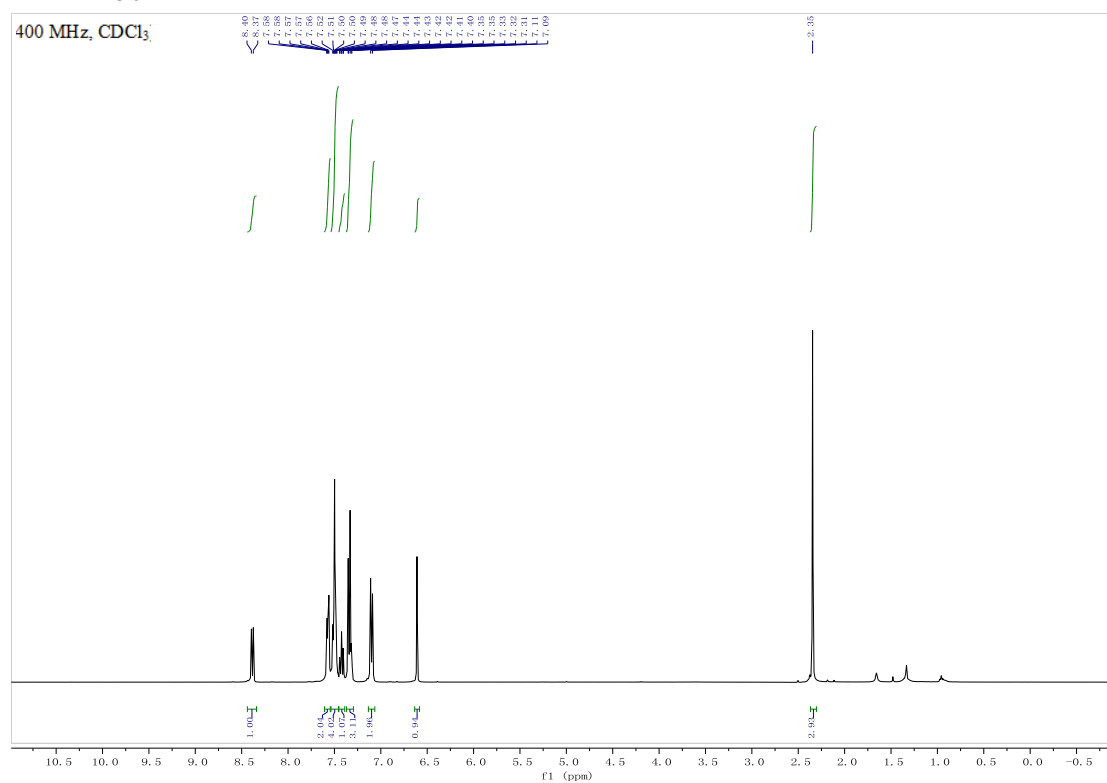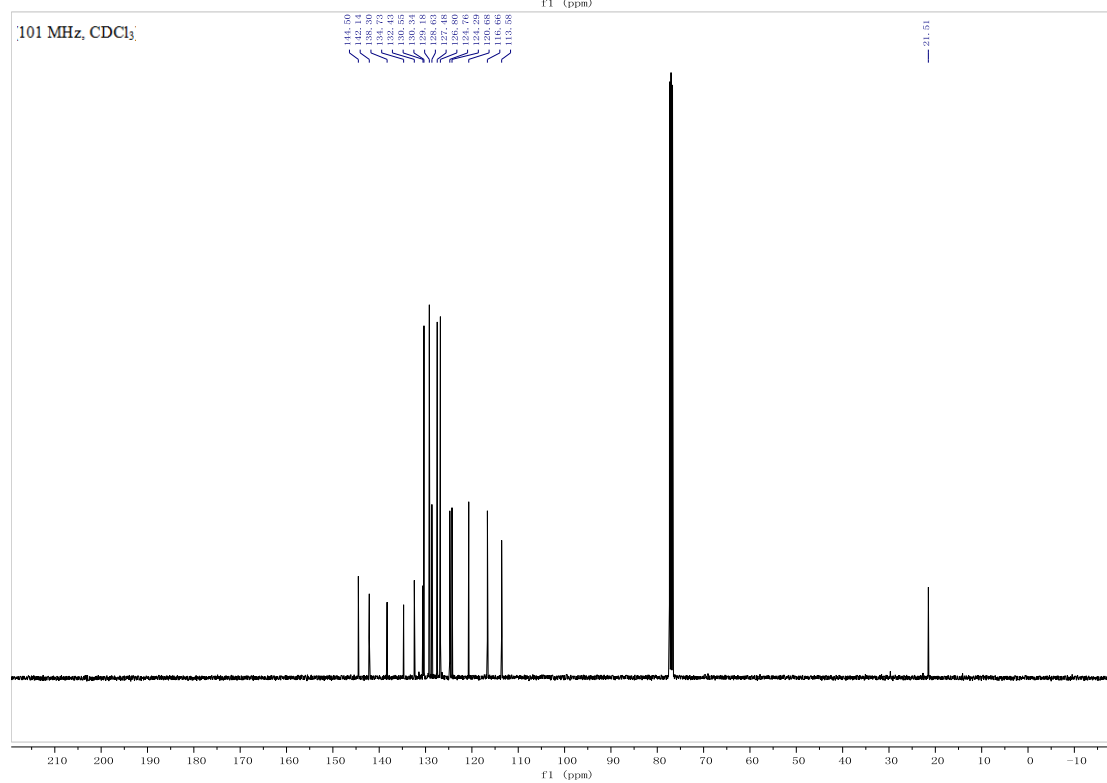

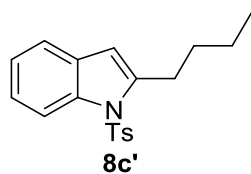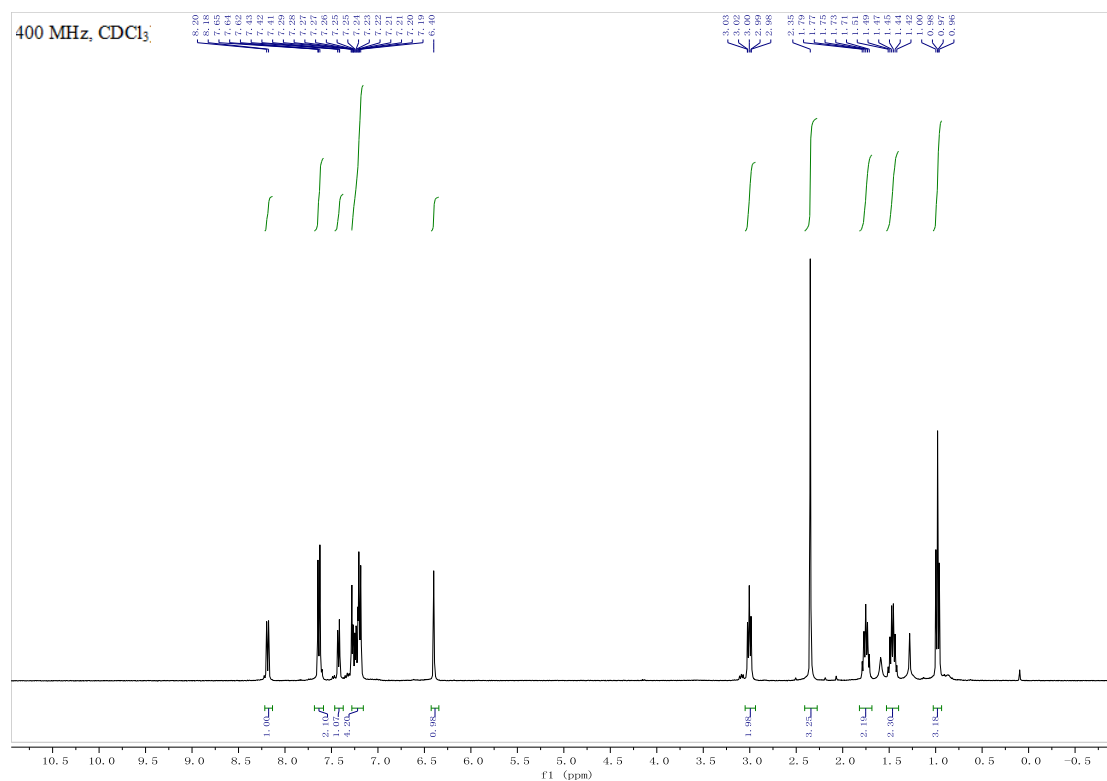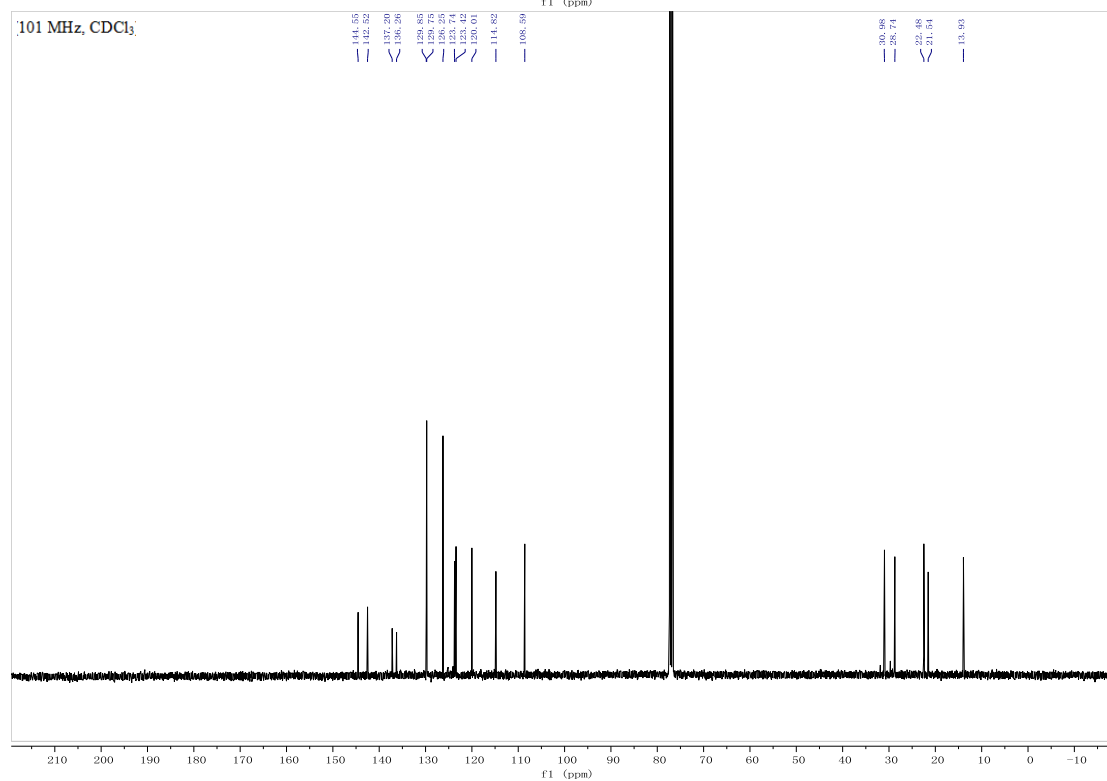

Supplement: Supplementary file 1 [file 22221984]
